# Supplementary material for: Emerging investigator series: impacts of land use on dissolved organic matter quality in agricultural watersheds: a molecular perspective
Source: Royal Society of Chemistry journal article supplement (doi:10.1039/d3em00506b), 2024-01-01
Supplement: d3em00506b1.xlsx [file d3em00506b1.xlsx]

## Sheet: Table S1  Sampling Location
Sub-Watershed	Description	Latitude	Longitude	SamplingDate	Discharge_m3/s	Drainage Area (km²)	Slope of Main Channel (m/km)	Slope of Main Channel (%)	Area Lakes/Wetlands (km²)	Area - Lakes (km²)	Area - Wetlands (km²)	Mean Elevation (m)	Mean Slope (%)	Annual Mean Temperature (°C)	Annual Precipitation (mm)	Swamp (%)	Bog (%)	Treed Upland (%)	Deciduous Treed (%)	Mixed Treed (%)	Coniferous Treed (%)	Plantations - Treed Cultivated (%)	Hedge Rows (%)	Community/Infrastructure (%)	Agriculture and Undifferentiated Rural Land Use (%)
KC12	Layton River, Saintfield Rd.	44.205	-78.961	2022-08-22	0.176263	40.8	3.8	0.4	7.8	0.2	7.6	284.7	4.5	6.8	870	7.9	0	0.2	1.4	1.8	1.9	0.2	0.8	1.1	24.7
KC14	Nonquon River, River St, Seagrave, 400m upstrm Reg Rd 2	44.2	-78.949	2022-08-08	n/a	1348.4	1.9	0.2	287.3	210.2	77.1	374.1	8.7	4.8	1058	16.5	17.6	0.5	472.4	396.7	80.6	0.2	0.1	18	53.3
KC17	Osler Marsh Outlet	44.103	-78.93	2022-08-22	n/a	22.2	5.7	0.6	6.9	1.5	5.4	271.7	3.8	6.9	891	1.2	0	0	0	0	0	0	0	0.2	4.3
KC2	Layton River	44.268	-78.985	2022-08-19	n/a	10.2	6.9	0.7	2.2	0	2.2	286.2	5	6.6	877	2.4	0	0.1	0.1	0.2	0.7	0.1	0.4	0.4	5.6
KC20	Lake Scugog, Cesarea	44.208	-78.855	2022-09-07	n/a	1.3	11.3	1.1	0.6	0.5	0	259.6	3.3	6.8	879	0.1	0	0	0.1	0	0	0.2	0	0.1	0.3
KC21	Sucker Creek	44.334	-78.724	2022-08-12	n/a	11.2	3.5	0.3	1.3	0	1.3	270.1	2	6.6	897	0.1	0	0	0.1	0	0.1	0	0	0	1.7
KC3	Stoney Creek, Settlers Rd.	44.327	-78.649	2022-08-12	n/a	20.1	2.1	0.2	8	0	7.9	273	1.4	6.6	897	7.7	0	0	0	0	0	0	0	0.6	11.6
KC4	Jennings Creek, Angeline St. N	44.371	-78.761	2022-08-12	n/a	15.2	2.4	0.2	1.2	0	1.1	271.5	1.8	6.6	897	1	0	0	0.1	0	0	0	0	1.9	12
KC5	Lake Scugog, Nonquon R. Outlet	44.177	-78.916	2022-09-07	n/a	66.3	3.3	0.3	21.4	12.9	8.5	267.5	2.9	6.8	889	4.1	0	0.3	2.2	0.4	1	0.1	0.4	8.7	31.2
KC6	Stoney Creek, Pigeon Lake Rd.	44.373	-78.658	2022-08-12	n/a	12.4	2	0.2	7.2	0	7.2	276.4	1.1	6.5	907	7	0	0	0	0	0	0	0	0.4	5
KC9	Unnamed Trib on Hwy 7	44.114	-78.845	2022-09-19	n/a	10.9	7.3	0.7	0.7	0	0.7	304.5	3.9	6.8	899	0.8	0	0.1	0.4	0.6	0	0	0.1	0.2	8.7
KC1	Burnt River, 11th Ln Somerville, 5 Km S of Kinmount	44.741	-78.659	2022-08-08	9.08	1051.2	1.5	0.1	261.4	75.2	186.2	274.9	3	6.7	887	173.3	0.4	4.1	34.9	22.7	25.3	7.6	7.6	60	616.1
KC11	Layton River	44.213	-78.986	2022-08-19	0.187	34	4.1	0.4	7.1	0.1	7	288.8	4.3	6.6	877	7.3	0	0.2	0.9	1.4	1.7	0.2	0.7	1	19.9
KC8	Layton River	44.227	-78.988	2022-08-19	0.15	30.5	4.2	0.4	7.1	0.1	7	288.4	4.2	6.6	877	7.3	0	0.2	0.8	1.1	1.6	0.2	0.6	0.9	17.3
KC13	Blackstock Creek, Hwy 57 N of McKee Rd.	44.1	-78.81	2022-08-17	0.113	1.6	12.4	1.2	0	0	0	302.7	3.6	6.8	899	0.1	0	0	0	0.1	0	0	0	0.1	1.3
KC7	Blackstock Creek, Hwy 57 N of Devitts Rd.	44.085	-78.803	2022-09-21	0.057	13.1	8.2	0.8	0.5	0	0.5	313.4	4.4	6.9	904	0.7	0	0.1	0.7	1.5	1.3	0.4	0	0.6	7.8
KC16	Blackstock Creek, Scugog Rd, Reg Rd 57, N of Blackstock	44.132	-78.829	2022-08-08	0.034	189.3	1.5	0.1	29	0.4	28.6	276	2.3	6.6	888	28.1	0.3	0.4	4.3	0	1.4	0.2	1.3	6.7	144.8
KC15	Blackstock Creek, Hwy 57 N of Edgerton Rd.	44.111	-78.815	2022-08-17	0.00531	1.5	10.4	1	0	0	0	294.3	3.1	6.8	899	0	0	0	0	0	0	0	0	0.5	0.9
KC19	East Cross Creek	44.083	-78.751	2022-08-17	0.003	5.7	11.1	1.1	N/A	N/A	N/A	329.2	4.5	6.6	911	0	0	0.1	0.3	0.9	1.1	0.1	0	0	0.3
KC10	Scugog River Down, Dwnstrm Lindsay lagoons	44.371	-78.761	2022-08-08	0	1633.8	1.8	0.2	405.4	267.6	137.8	356.1	7.6	5	1047	73.8	18.2	1.4	503.1	403.2	95.1	0.9	0.6	27.5	154
KC18	Stoney Creek, Post Rd.	44.29	-78.651	2022-08-12	0	37.6	1.7	0.2	12.1	0	12.1	267.1	2	6.6	897	11.1	0	0.1	0.3	0	0.2	0	0.1	1.2	23.9
KC22	Scugog River Up, Hwys 7 and 35, upstrm Lindsay	44.328	-78.73	2022-08-08	0	35.1	5.4	0.5	3.6	0.1	3.5	298.1	3.9	6.8	899	4	0	0.3	1	2.3	1.5	0.5	0.3	1.8	23.2

## Sheet: Table S2 DOM and Water Quality
Site	mzwa	a254	a275-295	C	H	N	O	P	S	oc	hc	nc	sc	nosc	dbe	Temperature_oC	pH	Conductivity_uScm	Turbidity_NTU	DO_mgL	Chloride_mgL	Nitrate_mgL	Nitrite_mgL	AmmoniaTotal_mgL	TotalKjeldahlNitrogen_mgL	PhosphorusTotal_mgL
KC1	485	0.348407	0.075	21.8	35.7	0.01	8.9	1.48	0	0.503	1.734	0.0002	0	-1.106	5.7	24.5	8	116.2	6.05	8.42
KC10	348	0.226669	0.0325	16.1	19.1	0	6.6	0.55	0.44	0.43	1.148	0	0.0364	-0.423	7.9	25.6	7.7	430.3	1.48	5.38
KC11	447	0.214574	0.011	22.9	29.7	0.03	8.3	0.29	0	0.392	1.303	0.0021	0	-0.579	9.3	13.68	7.88	517	2.1	5.38	22.1	0.57	0.05	0.1	0.6	0.033
KC12	459	0.14694	0.023	25.6	33.1	0.4	3.5	1.86	0	0.155	1.253	0.0113	0	-1.337	11.1		7.81	590	9.3	3.04	34.8	0.76	0.05	0.01	0.7	0.051
KC13	461	0.0808948	0.0075	26	27.9	0.09	3.9	1.88	0.01	0.175	1.072	0.0057	0.0004	-1.094	14	12.01	8.1	582	0.9	7.35	27.3	7.76	0.05	0.01	0.19	0.009
KC14	475	0.445789	0.0205	25	24.5	0.57	5.1	1.73	0.23	0.301	0.873	0.0382	0.0203	-0.558	14.9	25.9	7.69	560	5.89	6.51
KC15	366	0.173717	0.0185	18.6	23.8	0.13	6.9	0.23	0.02	0.397	1.279	0.0077	0.0011	-0.515	7.9	16.91	7.65	1500	3.1	5.06	273	0.19	0.15	0.01	0.69	0.086
KC16	436	0.451013	0.033	22.5	26.1	0.09	6.3	1.24	0	0.395	1.037	0.0063	0	-0.543	11.1	22	7.99	584	5.32	7.74
KC17	457	0.0756384	0.063	22.3	35.4	0.07	6.2	1.7	0.04	0.316	1.616	0.0023	0.003	-1.403	6.5	19	7.9	1206	4.3	3.07	91.6	0.05	0.05	0.03	1	0.022
KC18	456	0.348221	0.016	20.5	32.8	0	8.2	1.55	0	0.445	1.644	0	0	-1.166	5.8
KC19	477	1.31203	0.013	25.8	32	0	4.9	1.84	0.05	0.226	1.233	0	0.0038	-1.197	11.7	16.71	8.11	333	4.5	6.5	1.9	0.05	0.05	0.01	0.35	0.06
KC2	485	0.557641	0.0185	25.9	32.7	0.76	4.1	2.09	0.01	0.191	1.323	0.0445	0.0006	-1.261	12	18.01	7.23	637	15.2	0	24.2	0.05	0.05	0.38	2.35	0.199
KC20	488	0.189779	0.023	25.5	28.3	0.44	5.7	1.74	0.11	0.271	1.156	0.029	0.0068	-0.897	13.4	21	9.09	340.5	0.5	9.76	48.2	0.05	0.05	0.01	1.04	0.025
KC21	464	0.29223	0.015	26.1	28.6	0.22	3.8	1.96	0	0.168	1.131	0.0137	0	-1.154	13.9
KC22	537	0.161942	0.024	30.4	42.1	0	5.1	1.56	0	0.211	1.393	0	0	-1.309	11.1	26.5	7.85	361.1	6.15	9.64
KC3	346	0.378818	0.02	18	22.8	0.05	6.1	0.31	0.01	0.387	1.267	0.0029	0.0007	-0.553	7.8
KC4	418	0.161942	0.015	23.5	27.3	0.02	2.9	2.02	0	0.139	1.16	0.0009	0	-1.361	11.9
KC5	430	0.106536	0.022	22.2	30.5	0.04	4.7	1.83	0.05	0.236	1.374	0.0012	0.0109	-1.333	8.9	21.4	8.71	467.7	1.7	8.97	77.3	0.05	0.05	0.01	1.39	0.042
KC6	503	0.0646995	0.0175	27	32	0.9	4.6	1.99	0	0.197	1.238	0.0507	0.0001	-1.094	13.5
KC7	473	0.121239	0.012	25.2	36.2	0	5.9	0.95	0.38	0.317	1.299	0	0.0317	-0.879	8.5	14.46	7.87	615	3	7	54	3.1	0.07	0.01	0.31	0.029
KC9	489	0.357133	0.015	24.8	27.4	0.36	6.6	1.61	0.12	0.333	1.162	0.0221	0.0066	-0.806	13.1	17.45	8.05	8.11	88.1	530	20.9	2.06	0.05	0.03	0.6	0.022

## Sheet: Table S3 P containing DOM
Molecules relating to agricultural impact	dbe	c	h	n	o	p	s	oc	hc	nc	sc	ai	nosc
C33H40OP2	15	33	40	0	1	2	0	0.03	1.212	0	0	0.4	-1.45
C33H44OP2	13	33	44	0	1	2	0	0.03	1.333	0	0	0.3	-1.58
C25H28OP2	13	25	28	0	1	2	0	0.04	1.12	0	0	0.5	-1.44
C38H23O2P	28	38	23	0	2	1	0	0.053	0.605	0	0	0.7	-0.63
C34H44O2P2	14	34	44	0	2	2	0	0.059	1.294	0	0	0.3	-1.47
C33H38O2P2	16	33	38	0	2	2	0	0.061	1.152	0	0	0.4	-1.33
C33H40O2P2	15	33	40	0	2	2	0	0.061	1.212	0	0	0.4	-1.39
C33H42O2P2	14	33	42	0	2	2	0	0.061	1.273	0	0	0.3	-1.45
C33H44O2P2	13	33	44	0	2	2	0	0.061	1.333	0	0	0.3	-1.52
C33H46O2P2	12	33	46	0	2	2	0	0.061	1.394	0	0	0.3	-1.58
C32H38O2P2	15	32	38	0	2	2	0	0.062	1.188	0	0	0.4	-1.38
C32H40O2P2	14	32	40	0	2	2	0	0.062	1.25	0	0	0.4	-1.44
C32H42O2P2	13	32	42	0	2	2	0	0.062	1.312	0	0	0.3	-1.5
C32H44O2P2	12	32	44	0	2	2	0	0.062	1.375	0	0	0.3	-1.56
C23H32O2P2	9	23	32	0	2	2	0	0.087	1.391	0	0	0.3	-1.65
C33H42O3P2	14	33	42	0	3	2	0	0.091	1.273	0	0	0.3	-1.39
C32H38O3P2	15	32	38	0	3	2	0	0.094	1.188	0	0	0.4	-1.31
C32H40O3P2	14	32	40	0	3	2	0	0.094	1.25	0	0	0.3	-1.38
C32H42O3P2	13	32	42	0	3	2	0	0.094	1.312	0	0	0.3	-1.44
C32H44O3P2	12	32	44	0	3	2	0	0.094	1.375	0	0	0.3	-1.5
C31H36O3P2	15	31	36	0	3	2	0	0.097	1.161	0	0	0.4	-1.29
C31H38O3P2	14	31	38	0	3	2	0	0.097	1.226	0	0	0.3	-1.35
C31H40O3P2	13	31	40	0	3	2	0	0.097	1.29	0	0	0.3	-1.42
C31H42O3P2	12	31	42	0	3	2	0	0.097	1.355	0	0	0.3	-1.48
C30H42O3P2	11	30	42	0	3	2	0	0.1	1.4	0	0	0.2	-1.53
C33H40OP2	15	33	40	0	1	2	0	0.03	1.212	0	0	0.4	-1.45
C33H44OP2	13	33	44	0	1	2	0	0.03	1.333	0	0	0.3	-1.58
C25H28OP2	13	25	28	0	1	2	0	0.04	1.12	0	0	0.5	-1.44
C38H23O2P	28	38	23	0	2	1	0	0.053	0.605	0	0	0.7	-0.63
C34H44O2P2	14	34	44	0	2	2	0	0.059	1.294	0	0	0.3	-1.47
C33H38O2P2	16	33	38	0	2	2	0	0.061	1.152	0	0	0.4	-1.33
C33H40O2P2	15	33	40	0	2	2	0	0.061	1.212	0	0	0.4	-1.39
C33H42O2P2	14	33	42	0	2	2	0	0.061	1.273	0	0	0.3	-1.45
C33H44O2P2	13	33	44	0	2	2	0	0.061	1.333	0	0	0.3	-1.52
C33H46O2P2	12	33	46	0	2	2	0	0.061	1.394	0	0	0.3	-1.58
C32H38O2P2	15	32	38	0	2	2	0	0.062	1.188	0	0	0.4	-1.38
C32H40O2P2	14	32	40	0	2	2	0	0.062	1.25	0	0	0.4	-1.44
C32H42O2P2	13	32	42	0	2	2	0	0.062	1.312	0	0	0.3	-1.5
C32H44O2P2	12	32	44	0	2	2	0	0.062	1.375	0	0	0.3	-1.56
C23H32O2P2	9	23	32	0	2	2	0	0.087	1.391	0	0	0.3	-1.65
C33H42O3P2	14	33	42	0	3	2	0	0.091	1.273	0	0	0.3	-1.39
C32H38O3P2	15	32	38	0	3	2	0	0.094	1.188	0	0	0.4	-1.31
C32H40O3P2	14	32	40	0	3	2	0	0.094	1.25	0	0	0.3	-1.38
C32H42O3P2	13	32	42	0	3	2	0	0.094	1.312	0	0	0.3	-1.44
C32H44O3P2	12	32	44	0	3	2	0	0.094	1.375	0	0	0.3	-1.5
C31H36O3P2	15	31	36	0	3	2	0	0.097	1.161	0	0	0.4	-1.29
C31H38O3P2	14	31	38	0	3	2	0	0.097	1.226	0	0	0.3	-1.35
C31H40O3P2	13	31	40	0	3	2	0	0.097	1.29	0	0	0.3	-1.42
C31H42O3P2	12	31	42	0	3	2	0	0.097	1.355	0	0	0.3	-1.48
C30H42O3P2	11	30	42	0	3	2	0	0.1	1.4	0	0	0.2	-1.53
C29H30O5P2	16	29	30	0	5	2	0	0.172	1.034	0	0	0.4	-1.03
C29H32O5P2	15	29	32	0	5	2	0	0.172	1.103	0	0	0.4	-1.1
C29H36O5P2	13	29	36	0	5	2	0	0.172	1.241	0	0	0.3	-1.24
C28H28O5P2	16	28	28	0	5	2	0	0.179	1	0	0	0.4	-1
C28H32O5P2	14	28	32	0	5	2	0	0.179	1.143	0	0	0.3	-1.14
C28H34O5P2	13	28	34	0	5	2	0	0.179	1.214	0	0	0.3	-1.21
C28H36O5P2	12	28	36	0	5	2	0	0.179	1.286	0	0	0.2	-1.29
C27H36O5P2	11	27	36	0	5	2	0	0.185	1.333	0	0	0.2	-1.33
C29H30O6P2	16	29	30	0	6	2	0	0.207	1.034	0	0	0.4	-0.97
C29H32O6P2	15	29	32	0	6	2	0	0.207	1.103	0	0	0.3	-1.03
C29H36O6P2	13	29	36	0	6	2	0	0.207	1.241	0	0	0.2	-1.17
C28H28O6P2	16	28	28	0	6	2	0	0.214	1	0	0	0.4	-0.93
C28H36O6P2	12	28	36	0	6	2	0	0.214	1.286	0	0	0.2	-1.21
C27H30O6P2	14	27	30	0	6	2	0	0.222	1.111	0	0	0.3	-1.04
C27H34O6P2	12	27	34	0	6	2	0	0.222	1.259	0	0	0.2	-1.19
