# Supplementary material for: Emerging investigator series: impacts of land use on dissolved organic matter quality in agricultural watersheds: a molecular perspective
Source: Royal Society of Chemistry journal article supplement (doi:10.1039/d3em00506b), 2024-01-01
Supplement: d3em00506b2.xlsx [file d3em00506b2.xlsx]

## Sheet: Sheet1
file_id	mz	observed_intens	m	m_cal	ppm	nm	sum_formula	dbe	c	h	n	o	p	s	oc	hc	nc	sc	ai	nosc	rel_int
KC20	153.019	1844078	154.027	154.027	-0.4699	154	C7H6O4	5	7	6	0	4	0	0	0.571	0.857	0	0	0.3	0.29	9.0134
KC6	153.019	6885534	154.027	154.027	-0.4699	154	C7H6O4	5	7	6	0	4	0	0	0.571	0.857	0	0	0.3	0.29	9.64373
KC2	153.019	6189707	154.027	154.027	-0.34	154	C7H6O4	5	7	6	0	4	0	0	0.571	0.857	0	0	0.3	0.29	17.3529
KC5	154.918	55880152	155.926	155.926	-0.2763	156	C5HPS2	6	5	1	0	0	1	2	0	0.2	0	0.4	1.5	-0.4	100
KC6	155.035	4960538	156.042	156.042	-0.272	156	C7H8O4	4	7	8	0	4	0	0	0.571	1.143	0	0	0	0	6.94762
KC6	155.071	3163087	156.079	156.079	-0.3072	156	C8H12O3	3	8	12	0	3	0	0	0.375	1.5	0	0	0	-0.75	4.43015
KC20	156.053	1564364	157.06	157.06	0.2026	157	C4H7N5O2	4	4	7	5	2	0	0	0.5	1.75	1.25	0	1	3	7.64622
KC20	156.978	1503923	157.985	157.985	-0.0094	158	C5H2O6	5	5	2	0	6	0	0	1.2	0.4	0	0	1	2	7.3508
KC2	157.014	3196024	158.021	158.022	-0.4872	158	C6H6O5	4	6	6	0	5	0	0	0.833	1	0	0	-1	0.67	8.96009
KC6	157.014	6658019	158.021	158.022	-0.4239	158	C6H6O5	4	6	6	0	5	0	0	0.833	1	0	0	-1	0.67	9.32508
KC6	157.051	6593659	158.058	158.058	-0.3954	158	C7H10O4	3	7	10	0	4	0	0	0.571	1.429	0	0	-0.3	-0.29	9.23494
KC2	157.051	3462216	158.058	158.058	-0.3322	158	C7H10O4	3	7	10	0	4	0	0	0.571	1.429	0	0	-0.3	-0.29	9.70636
KC20	158.956	1391903	159.963	159.963	-0.0485	160	C8H2P2	9	8	2	0	0	2	0	0	0.25	0	0	1.2	-1.5	6.80328
KC2	158.985	2954880	159.993	159.993	0.0666	160	C5H5O4P	4	5	5	0	4	1	0	0.8	1	0	0	-999	-0.4	8.28404
KC20	158.994	1491828	160.002	160.002	-0.3183	160	C6H8OS2	3	6	8	0	1	0	2	0.167	1.333	0	0.3333	0	-0.33	7.29168
KC9	159.024	1497230	160.031	160.031	-0.3989	160	C13H4	12	13	4	0	0	0	0	0	0.308	0	0	0.9	-0.31	10.6304
KC6	159.03	4662796	160.037	160.037	-0.419	160	C6H8O5	3	6	8	0	5	0	0	0.833	1.333	0	0	-2	0.33	6.53061
KC20	159.037	1478698	160.044	160.044	-0.0687	160	C10H9P	7	10	9	0	0	1	0	0	0.9	0	0	0.7	-1.4	7.22751
KC2	159.045	3234950	160.052	160.052	-0.3949	160	C10H8O2	7	10	8	0	2	0	0	0.2	0.8	0	0	0.6	-0.4	9.06922
KC20	161.04	1596454	162.047	162.047	0.1611	162	C13H6	11	13	6	0	0	0	0	0	0.462	0	0	0.8	-0.46	7.80307
KC22	161.04	3477737	162.047	162.047	0.4697	162	C13H6	11	13	6	0	0	0	0	0	0.462	0	0	0.8	-0.46	19.8427
KC2	161.045	6041119	162.053	162.053	-0.4759	162	C6H10O5	2	6	10	0	5	0	0	0.833	1.667	0	0	-3	0	16.9364
KC6	161.045	5918007	162.053	162.053	-0.4759	162	C6H10O5	2	6	10	0	5	0	0	0.833	1.667	0	0	-3	0	8.28863
KC20	161.045	1506990	162.053	162.053	-0.4142	162	C6H10O5	2	6	10	0	5	0	0	0.833	1.667	0	0	-3	0	7.36579
KC15	161.046	3999644	162.053	162.053	-0.0439	162	C6H10O5	2	6	10	0	5	0	0	0.833	1.667	0	0	-3	0	13.4591
KC16	161.046	3687076	162.053	162.053	0.0178	162	C6H10O5	2	6	10	0	5	0	0	0.833	1.667	0	0	-3	0	11.7384
KC3	161.046	4306524	162.053	162.053	0.2646	162	C6H10O5	2	6	10	0	5	0	0	0.833	1.667	0	0	-3	0	13.7008
KC9	161.053	1741788	162.06	162.06	0.1786	162	C10H11P	6	10	11	0	0	1	0	0	1.1	0	0	0.6	-1.6	12.3667
KC9	161.082	1525785	162.089	162.089	0.1072	162	C7H14O4	1	7	14	0	4	0	0	0.571	2	0	0	-1	-0.86	10.8331
KC12	162.951	3040094	163.958	163.958	-0.1365	164	C7H2OP2	8	7	2	0	1	2	0	0.143	0.286	0	0	1.2	-1.43	6.07792
KC6	163.04	5942808	164.047	164.047	-0.4744	164	C9H8O3	6	9	8	0	3	0	0	0.333	0.889	0	0	0.5	-0.22	8.32337
KC2	163.04	5476923	164.047	164.047	-0.3524	164	C9H8O3	6	9	8	0	3	0	0	0.333	0.889	0	0	0.5	-0.22	15.3546
KC9	163.053	1617489	164.06	164.06	-0.1522	164	C6H13O3P	1	6	13	0	3	1	0	0.5	2.167	0	0	-1.5	-2	11.4842
KC9	163.055	1669081	164.063	164.063	0.1587	164	C13H8	10	13	8	0	0	0	0	0	0.615	0	0	0.8	-0.62	11.8505
KC6	163.076	4317120	164.084	164.084	-0.3859	164	C10H12O2	5	10	12	0	2	0	0	0.2	1.2	0	0	0.4	-0.8	6.04647
KC2	163.076	3330235	164.084	164.084	-0.325	164	C10H12O2	5	10	12	0	2	0	0	0.2	1.2	0	0	0.4	-0.8	9.33635
KC15	163.077	3486301	164.084	164.084	0.3454	164	C10H12O2	5	10	12	0	2	0	0	0.2	1.2	0	0	0.4	-0.8	11.7316
KC20	163.089	1397585	164.097	164.097	-0.1248	164	C7H17O2P	0	7	17	0	2	1	0	0.286	2.429	0	0	-0.8	-2.57	6.83105
KC8	163.098	3715660	164.105	164.105	-0.1383	164	C7H16O4	0	7	16	0	4	0	0	0.571	2.286	0	0	-1.3	-1.14	5.12549
KC6	163.113	2883048	164.12	164.12	-0.4194	164	C11H16O	4	11	16	0	1	0	0	0.091	1.455	0	0	0.3	-1.27	4.03794
KC9	163.149	1394649	164.157	164.157	0.2781	164	C12H20	3	12	20	0	0	0	0	0	1.667	0	0	0.2	-1.67	9.90204
KC20	164.966	1721514	165.974	165.974	-0.3762	166	C7H4OP2	7	7	4	0	1	2	0	0.143	0.571	0	0	1	-1.71	8.41433
KC9	164.983	1406541	165.99	165.99	-0.4631	166	C7H2O5	7	7	2	0	5	0	0	0.714	0.286	0	0	1	1.14	9.98647
KC6	165.019	7932552	166.027	166.027	-0.4961	166	C8H6O4	6	8	6	0	4	0	0	0.5	0.75	0	0	0.5	0.25	11.1102
KC20	165.035	1500965	166.042	166.042	0.0692	166	C12H6O	10	12	6	0	1	0	0	0.083	0.5	0	0	0.8	-0.33	7.33634
KC6	165.056	6158005	166.063	166.063	-0.4088	166	C9H10O3	5	9	10	0	3	0	0	0.333	1.111	0	0	0.3	-0.44	8.62477
KC2	165.056	5651460	166.063	166.063	-0.2883	166	C9H10O3	5	9	10	0	3	0	0	0.333	1.111	0	0	0.3	-0.44	15.8439
KC6	165.069	3458926	166.076	166.076	-0.0304	166	C6H15O3P	0	6	15	0	3	1	0	0.5	2.5	0	0	-2	-2.33	4.8445
KC6	165.092	5584226	166.099	166.099	-0.4418	166	C10H14O2	4	10	14	0	2	0	0	0.2	1.4	0	0	0.2	-1	7.82115
KC2	166.051	3062031	167.058	167.058	-0.4002	167	C8H9NO3	5	8	9	1	3	0	0	0.375	1.125	0.125	0	0.2	0	8.58444
KC2	167.035	7550882	168.042	168.042	-0.4311	168	C8H8O4	5	8	8	0	4	0	0	0.5	1	0	0	0.2	0	21.169
KC6	167.035	10038448	168.042	168.042	-0.4311	168	C8H8O4	5	8	8	0	4	0	0	0.5	1	0	0	0.2	0	14.0596
KC7	167.035	10351302	168.042	168.042	0.283	168	C8H8O4	5	8	8	0	4	0	0	0.5	1	0	0	0.2	0	0.105007
KC7	167.035	18362896	168.042	168.042	0.4021	168	C8H8O4	5	8	8	0	4	0	0	0.5	1	0	0	0.2	0	4.11975
KC16	167.035	3389857	168.042	168.042	0.4616	168	C8H8O4	5	8	8	0	4	0	0	0.5	1	0	0	0.2	0	10.7921
KC20	167.05	1642749	168.058	168.058	0.425	168	C12H8O	9	12	8	0	1	0	0	0.083	0.667	0	0	0.7	-0.5	8.02935
KC9	167.056	1437459	168.063	168.063	-0.3677	168	C5H12O6	0	5	12	0	6	0	0	1.2	2.4	0	0	6	0	10.206
KC7	167.071	15906393	168.079	168.079	-0.2258	168	C9H12O3	4	9	12	0	3	0	0	0.333	1.333	0	0	0.2	-0.67	0.116179
KC7	167.071	12483777	168.079	168.079	-0.2258	168	C9H12O3	4	9	12	0	3	0	0	0.333	1.333	0	0	0.2	-0.67	0.628245
KC7	167.071	15822765	168.079	168.079	-0.1068	168	C9H12O3	4	9	12	0	3	0	0	0.333	1.333	0	0	0.2	-0.67	0.428808
KC7	167.071	12285472	168.079	168.079	-0.1068	168	C9H12O3	4	9	12	0	3	0	0	0.333	1.333	0	0	0.2	-0.67	0.938464
KC7	167.071	15565295	168.079	168.079	-0.1068	168	C9H12O3	4	9	12	0	3	0	0	0.333	1.333	0	0	0.2	-0.67	0.467543
KC7	167.071	17463514	168.079	168.079	-0.1068	168	C9H12O3	4	9	12	0	3	0	0	0.333	1.333	0	0	0.2	-0.67	0.182436
KC20	167.108	1557339	168.115	168.115	-0.4964	168	C10H16O2	3	10	16	0	2	0	0	0.2	1.6	0	0	0.1	-1.2	7.61189
KC9	167.108	1640337	168.115	168.115	-0.4964	168	C10H16O2	3	10	16	0	2	0	0	0.2	1.6	0	0	0.1	-1.2	11.6464
KC2	167.108	3243395	168.115	168.115	-0.4369	168	C10H16O2	3	10	16	0	2	0	0	0.2	1.6	0	0	0.1	-1.2	9.0929
KC7	167.108	16629109	168.115	168.115	-0.2585	168	C10H16O2	3	10	16	0	2	0	0	0.2	1.6	0	0	0.1	-1.2	2.08122
KC7	167.108	21178444	168.115	168.115	-0.199	168	C10H16O2	3	10	16	0	2	0	0	0.2	1.6	0	0	0.1	-1.2	0.154686
KC7	167.108	19092994	168.115	168.115	-0.08	168	C10H16O2	3	10	16	0	2	0	0	0.2	1.6	0	0	0.1	-1.2	0.717519
KC7	167.108	18278796	168.115	168.115	-0.08	168	C10H16O2	3	10	16	0	2	0	0	0.2	1.6	0	0	0.1	-1.2	0.439652
KC7	167.108	17657312	168.115	168.115	-0.08	168	C10H16O2	3	10	16	0	2	0	0	0.2	1.6	0	0	0.1	-1.2	0.530382
KC7	167.108	9776335	168.115	168.115	0.0389	168	C10H16O2	3	10	16	0	2	0	0	0.2	1.6	0	0	0.1	-1.2	0.412579
KC7	167.108	19148978	168.115	168.115	0.2174	168	C10H16O2	3	10	16	0	2	0	0	0.2	1.6	0	0	0.1	-1.2	0.194254
KC7	167.108	16134911	168.115	168.115	0.3958	168	C10H16O2	3	10	16	0	2	0	0	0.2	1.6	0	0	0.1	-1.2	3.6199
KC20	167.119	1688314	168.126	168.126	0.1972	168	C9H16N2O	3	9	16	2	1	0	0	0.111	1.778	0.2222	0	0	-0.89	8.25206
KC7	167.144	1790895	168.151	168.151	0.4225	168	C11H20O	2	11	20	0	1	0	0	0.091	1.818	0	0	0.1	-1.64	1.90575
KC20	169.008	1379950	170.016	170.016	-0.3162	170	C14H2	14	14	2	0	0	0	0	0	0.143	0	0	1	-0.14	6.74485
KC2	169.014	6533406	170.021	170.022	-0.394	170	C7H6O5	5	7	6	0	5	0	0	0.714	0.857	0	0	0	0.57	18.3165
KC20	169.021	1443086	170.029	170.029	-0.0054	170	C11H7P	9	11	7	0	0	1	0	0	0.636	0	0	0.8	-1.09	7.05345
KC6	169.051	9600301	170.058	170.058	-0.4851	170	C8H10O4	4	8	10	0	4	0	0	0.5	1.25	0	0	0	-0.25	13.446
KC3	169.051	3349283	170.058	170.058	-0.0735	170	C8H10O4	4	8	10	0	4	0	0	0.5	1.25	0	0	0	-0.25	10.6554
KC7	169.051	18250488	170.058	170.058	0.3381	170	C8H10O4	4	8	10	0	4	0	0	0.5	1.25	0	0	0	-0.25	4.09454
KC9	169.066	1430418	170.073	170.073	0.3608	170	C12H10O	8	12	10	0	1	0	0	0.083	0.833	0	0	0.6	-0.67	10.156
KC7	169.087	14535467	170.094	170.094	-0.0471	170	C9H14O3	3	9	14	0	3	0	0	0.333	1.556	0	0	0	-0.89	0.151847
KC7	169.087	10909917	170.094	170.094	0.0117	170	C9H14O3	3	9	14	0	3	0	0	0.333	1.556	0	0	0	-0.89	0.262412
KC9	170.985	1438507	171.992	171.993	-0.4613	172	C6H5O4P	5	6	5	0	4	1	0	0.667	0.833	0	0	0	-0.33	10.2134
KC6	171.03	10275322	172.037	172.037	-0.4479	172	C7H8O5	4	7	8	0	5	0	0	0.714	1.143	0	0	-0.5	0.29	14.3914
KC20	171.037	1584647	172.044	172.044	0.343	172	C11H9P	8	11	9	0	0	1	0	0	0.818	0	0	0.7	-1.27	7.74536
KC9	171.058	1631277	172.065	172.065	0.056	172	C8H13O2P	3	8	13	0	2	1	0	0.25	1.625	0	0	0	-1.75	11.5821
KC2	171.066	6621372	172.073	172.074	-0.4217	172	C8H12O4	3	8	12	0	4	0	0	0.5	1.5	0	0	-0.2	-0.5	18.5631
KC7	171.066	15666029	172.074	172.074	-0.1893	172	C8H12O4	3	8	12	0	4	0	0	0.5	1.5	0	0	-0.2	-0.5	4.23483
KC7	171.066	29784606	172.074	172.074	-0.073	172	C8H12O4	3	8	12	0	4	0	0	0.5	1.5	0	0	-0.2	-0.5	0.807183
KC7	171.066	17772624	172.074	172.074	-0.0149	172	C8H12O4	3	8	12	0	4	0	0	0.5	1.5	0	0	-0.2	-0.5	0.471728
KC7	171.066	14650134	172.074	172.074	0.0432	172	C8H12O4	3	8	12	0	4	0	0	0.5	1.5	0	0	-0.2	-0.5	0.618262
KC3	171.066	3368312	172.074	172.074	0.1013	172	C8H12O4	3	8	12	0	4	0	0	0.5	1.5	0	0	-0.2	-0.5	10.7159
KC7	171.066	22367636	172.074	172.074	0.3338	172	C8H12O4	3	8	12	0	4	0	0	0.5	1.5	0	0	-0.2	-0.5	5.01823
KC7	171.103	10126303	172.11	172.11	-0.2793	172	C9H16O3	2	9	16	0	3	0	0	0.333	1.778	0	0	-0.2	-1.11	1.26736
KC7	171.103	12374589	172.11	172.11	0.2436	172	C9H16O3	2	9	16	0	3	0	0	0.333	1.778	0	0	-0.2	-1.11	0.125532
KC2	171.139	2895832	172.146	172.146	0.1535	172	C10H20O2	1	10	20	0	2	0	0	0.2	2	0	0	-0.1	-1.6	8.1185
KC20	172.007	1464579	173.014	173.014	-0.1031	173	C8H4N3P	9	8	4	3	0	1	0	0	0.5	0.375	0	1.2	0	7.1585
KC9	172.964	1818559	173.972	173.972	-0.2523	174	C5H3O5P	5	5	3	0	5	1	0	1	0.6	0	0	1	0.4	12.9118
KC2	173.009	7597431	174.016	174.016	-0.4115	174	C6H6O6	4	6	6	0	6	0	0	1	1	0	0	-999	1	21.2995
KC7	173.009	4319820	174.016	174.016	-0.0667	174	C6H6O6	4	6	6	0	6	0	0	1	1	0	0	-999	1	0.129757
KC3	173.009	3819305	174.016	174.016	-0.0093	174	C6H6O6	4	6	6	0	6	0	0	1	1	0	0	-999	1	12.1507
KC10	173.009	8300734	174.016	174.016	0.1631	174	C6H6O6	4	6	6	0	6	0	0	1	1	0	0	-999	1	6.03621
KC16	173.009	4946283	174.016	174.016	0.3355	174	C6H6O6	4	6	6	0	6	0	0	1	1	0	0	-999	1	15.7472
KC20	173.037	1664953	174.045	174.045	0.4314	174	C7H11O3P	3	7	11	0	3	1	0	0.429	1.571	0	0	-0.3	-1.43	8.13788
KC7	173.046	11144577	174.053	174.053	-0.2133	174	C7H10O5	3	7	10	0	5	0	0	0.714	1.429	0	0	-1	0	0.0813993
KC7	173.061	7003677	174.068	174.068	-0.4783	174	C11H10O2	7	11	10	0	2	0	0	0.182	0.909	0	0	0.6	-0.55	5.41321
KC2	173.061	3717541	174.068	174.068	-0.4209	174	C11H10O2	7	11	10	0	2	0	0	0.182	0.909	0	0	0.6	-0.55	10.4222
KC6	173.065	3044529	174.073	174.073	-0.3919	174	C8H16P2	2	8	16	0	0	2	0	0	2	0	0	0	-3.25	4.2641
KC12	173.065	2995205	174.073	174.073	-0.2195	174	C8H16P2	2	8	16	0	0	2	0	0	2	0	0	0	-3.25	5.98817
KC6	173.082	2974141	174.089	174.089	-0.4746	174	C8H14O4	2	8	14	0	4	0	0	0.5	1.75	0	0	-0.5	-0.75	4.16552
KC7	173.082	17434860	174.089	174.089	-0.2449	174	C8H14O4	2	8	14	0	4	0	0	0.5	1.75	0	0	-0.5	-0.75	0.877408
KC7	173.082	17380278	174.089	174.089	-0.0151	174	C8H14O4	2	8	14	0	4	0	0	0.5	1.75	0	0	-0.5	-0.75	0.733478
KC7	173.082	44849220	174.089	174.089	0.3295	174	C8H14O4	2	8	14	0	4	0	0	0.5	1.75	0	0	-0.5	-0.75	10.062
KC7	173.082	45451744	174.089	174.089	0.3295	174	C8H14O4	2	8	14	0	4	0	0	0.5	1.75	0	0	-0.5	-0.75	5.26045
KC7	173.118	19621964	174.126	174.126	-0.4487	174	C9H18O3	1	9	18	0	3	0	0	0.333	2	0	0	-0.3	-1.33	15.166
KC7	173.118	15253185	174.126	174.126	-0.219	174	C9H18O3	1	9	18	0	3	0	0	0.333	2	0	0	-0.3	-1.33	1.98207
KC7	173.118	26239364	174.126	174.126	-0.0467	174	C9H18O3	1	9	18	0	3	0	0	0.333	2	0	0	-0.3	-1.33	0.711105
KC7	173.118	14583287	174.126	174.126	0.2978	174	C9H18O3	1	9	18	0	3	0	0	0.333	2	0	0	-0.3	-1.33	1.68783
KC7	175.04	9802682	176.047	176.047	-0.158	176	C10H8O3	7	10	8	0	3	0	0	0.3	0.8	0	0	0.6	-0.2	0.748808
KC17	175.04	3886549	176.047	176.047	0.2396	176	C10H8O3	7	10	8	0	3	0	0	0.3	0.8	0	0	0.6	-0.2	8.6916
KC20	175.045	1443541	176.052	176.052	-0.2997	176	C7H14OP2	2	7	14	0	1	2	0	0.143	2	0	0	-0.2	-3.14	7.05567
KC6	175.076	3456195	176.084	176.084	-0.3596	176	C11H12O2	6	11	12	0	2	0	0	0.182	1.091	0	0	0.4	-0.73	4.84067
KC7	175.076	3546157	176.084	176.084	-0.3028	176	C11H12O2	6	11	12	0	2	0	0	0.182	1.091	0	0	0.4	-0.73	6.46194
KC7	175.076	17251722	176.084	176.084	-0.3028	176	C11H12O2	6	11	12	0	2	0	0	0.182	1.091	0	0	0.4	-0.73	2.15914
KC7	175.076	10752141	176.084	176.084	-0.2461	176	C11H12O2	6	11	12	0	2	0	0	0.182	1.091	0	0	0.4	-0.73	1.39719
KC7	175.076	8500851	176.084	176.084	-0.0189	176	C11H12O2	6	11	12	0	2	0	0	0.182	1.091	0	0	0.4	-0.73	0.358751
KC2	175.113	2957147	176.12	176.12	-0.2773	176	C12H16O	5	12	16	0	1	0	0	0.083	1.333	0	0	0.4	-1.17	8.2904
KC20	175.149	1522116	176.157	176.157	0.0321	176	C13H20	4	13	20	0	0	0	0	0	1.538	0	0	0.3	-1.54	7.43973
KC20	176.093	1610487	177.1	177.1	-0.4047	177	C7H15NO4	1	7	15	1	4	0	0	0.571	2.143	0.1429	0	-2	-0.57	7.87166
KC9	176.14	1482465	177.148	177.148	-0.229	177	C7H19N3O2	0	7	19	3	2	0	0	0.286	2.714	0.4286	0	-2.5	-0.86	10.5255
KC9	176.975	1543622	177.982	177.982	-0.4194	178	C8H3O3P	8	8	3	0	3	1	0	0.375	0.375	0	0	1	-0.25	10.9597
KC9	176.975	1505766	177.982	177.982	0.4233	178	C8H3O3P	8	8	3	0	3	1	0	0.375	0.375	0	0	1	-0.25	10.691
KC15	177.019	3368204	178.027	178.027	0.0428	178	C9H6O4	7	9	6	0	4	0	0	0.444	0.667	0	0	0.6	0.22	11.3342
KC2	177.056	6711441	178.063	178.063	-0.4374	178	C10H10O3	6	10	10	0	3	0	0	0.3	1	0	0	0.4	-0.4	18.8156
KC9	177.113	1380996	178.121	178.121	0.0407	178	C8H18O4	0	8	18	0	4	0	0	0.5	2.25	0	0	-1	-1.25	9.8051
KC20	178.954	1488172	179.961	179.961	0.4489	180	C7HO4P	8	7	1	0	4	1	0	0.571	0.143	0	0	1.5	0.29	7.27382
KC20	178.969	1792688	179.977	179.977	0.1925	180	C11HOP	12	11	1	0	1	1	0	0.091	0.091	0	0	1.1	-0.36	8.76221
KC9	179.027	1420872	180.034	180.034	-0.0013	180	C9H9O2P	6	9	9	0	2	1	0	0.222	1	0	0	0.5	-1.11	10.0882
KC20	179.027	1806528	180.034	180.034	0.2765	180	C9H9O2P	6	9	9	0	2	1	0	0.222	1	0	0	0.5	-1.11	8.82986
KC2	179.071	8594725	180.079	180.079	-0.4884	180	C10H12O3	5	10	12	0	3	0	0	0.3	1.2	0	0	0.3	-0.6	24.0954
KC20	180.978	1641885	181.985	181.985	0.4864	182	C7H2O6	7	7	2	0	6	0	0	0.857	0.286	0	0	1	1.43	8.02513
KC17	180.998	3372278	182.005	182.005	0.0408	182	C8H8OP2	6	8	8	0	1	2	0	0.125	1	0	0	0.6	-2	7.54152
KC2	181.051	11387536	182.058	182.058	-0.4532	182	C9H10O4	5	9	10	0	4	0	0	0.444	1.111	0	0	0.2	-0.22	31.9251
KC20	181.066	1391868	182.073	182.073	0.4468	182	C13H10O	9	13	10	0	1	0	0	0.077	0.769	0	0	0.7	-0.62	6.80311
KC9	181.079	1533357	182.086	182.086	0.078	182	C10H15OP	4	10	15	0	1	1	0	0.1	1.5	0	0	0.2	-1.8	10.8869
KC4	181.196	3420871	182.204	182.203	0.4142	182	C13H26	1	13	26	0	0	0	0	0	2	0	0	0.1	-2	7.93379
KC9	182.01	1436757	183.017	183.017	0.2406	183	C7H5NO5	6	7	5	1	5	0	0	0.714	0.714	0.1429	0	0	1.14	10.201
KC2	183.03	6740447	184.037	184.037	-0.473	184	C8H8O5	5	8	8	0	5	0	0	0.625	1	0	0	0	0.25	18.8969
KC5	183.058	3373643	184.065	184.065	-0.3822	184	C9H13O2P	4	9	13	0	2	1	0	0.222	1.444	0	0	0.2	-1.56	6.03728
KC9	183.058	1499727	184.065	184.065	0.324	184	C9H13O2P	4	9	13	0	2	1	0	0.222	1.444	0	0	0.2	-1.56	10.6481
KC2	183.066	8858180	184.073	184.074	-0.4485	184	C9H12O4	4	9	12	0	4	0	0	0.444	1.333	0	0	0	-0.44	24.834
KC9	183.066	1762963	184.074	184.074	0.312	184	C9H12O4	4	9	12	0	4	0	0	0.444	1.333	0	0	0	-0.44	12.5171
KC2	183.103	3133226	184.11	184.11	-0.4241	184	C10H16O3	3	10	16	0	3	0	0	0.3	1.6	0	0	0	-1	8.78404
KC9	183.212	1429011	184.219	184.219	0.3007	184	C13H28	0	13	28	0	0	0	0	0	2.154	0	0	0	-2.15	10.146
KC20	184.052	1565220	185.059	185.059	-0.3002	185	C10H7N3O	9	10	7	3	1	0	0	0.1	0.7	0.3	0	0.8	0.4	7.65041
KC6	184.964	2922311	185.972	185.972	-0.3436	186	C6H3O5P	6	6	3	0	5	1	0	0.833	0.5	0	0	-999	0.33	4.09293
KC9	184.98	1391773	185.987	185.987	-0.3766	186	C10H3O2P	10	10	3	0	2	1	0	0.2	0.3	0	0	1	-0.4	9.88162
KC6	185.009	3320053	186.016	186.016	-0.4387	186	C7H6O6	5	7	6	0	6	0	0	0.857	0.857	0	0	-1	0.86	4.65
KC9	185.009	1477867	186.016	186.016	-0.1699	186	C7H6O6	5	7	6	0	6	0	0	0.857	0.857	0	0	-1	0.86	10.4929
KC2	185.045	9026920	186.053	186.053	-0.4683	186	C8H10O5	4	8	10	0	5	0	0	0.625	1.25	0	0	-0.3	0	25.3071
KC3	185.046	3748437	186.053	186.053	0.0155	186	C8H10O5	4	8	10	0	5	0	0	0.625	1.25	0	0	-0.3	0	11.9253
KC2	185.082	35669544	186.089	186.089	-0.444	186	C9H14O4	3	9	14	0	4	0	0	0.444	1.556	0	0	-0.2	-0.67	100
KC11	185.082	3372221	186.089	186.089	-0.2291	186	C9H14O4	3	9	14	0	4	0	0	0.444	1.556	0	0	-0.2	-0.67	15.4715
KC15	185.082	7992783	186.089	186.089	-0.0141	186	C9H14O4	3	9	14	0	4	0	0	0.444	1.556	0	0	-0.2	-0.67	26.8962
KC10	185.082	14553079	186.089	186.089	0.0396	186	C9H14O4	3	9	14	0	4	0	0	0.444	1.556	0	0	-0.2	-0.67	10.5829
KC3	185.082	9457848	186.089	186.089	0.0396	186	C9H14O4	3	9	14	0	4	0	0	0.444	1.556	0	0	-0.2	-0.67	30.0892
KC16	185.082	8547633	186.089	186.089	0.2546	186	C9H14O4	3	9	14	0	4	0	0	0.444	1.556	0	0	-0.2	-0.67	27.2127
KC13	185.155	3030395	186.162	186.162	0.249	186	C11H22O2	1	11	22	0	2	0	0	0.182	2	0	0	-0.1	-1.64	13.6276
KC20	186.944	1450360	187.951	187.951	0.3807	188	C5HO6P	6	5	1	0	6	1	0	1.2	0.2	0	0	0.5	1.2	7.089
KC20	186.995	1714900	188.003	188.003	0.0527	188	C10H5O2P	9	10	5	0	2	1	0	0.2	0.5	0	0	0.9	-0.6	8.38201
KC9	187.025	1622152	188.032	188.032	-0.2748	188	C7H8O6	4	7	8	0	6	0	0	0.857	1.143	0	0	-2	0.57	11.5173
KC3	187.061	3979756	188.069	188.068	0.3872	188	C8H12O5	3	8	12	0	5	0	0	0.625	1.5	0	0	-0.7	-0.25	12.6612
KC2	187.097	3524879	188.105	188.105	-0.4928	188	C9H16O4	2	9	16	0	4	0	0	0.444	1.778	0	0	-0.4	-0.89	9.88204
KC15	187.098	3472066	188.105	188.105	-0.0675	188	C9H16O4	2	9	16	0	4	0	0	0.444	1.778	0	0	-0.4	-0.89	11.6837
KC16	187.098	3390828	188.105	188.105	0.4641	188	C9H16O4	2	9	16	0	4	0	0	0.444	1.778	0	0	-0.4	-0.89	10.7952
KC9	187.134	1460902	188.141	188.141	0.3285	188	C10H20O3	1	10	20	0	3	0	0	0.3	2	0	0	-0.3	-1.4	10.3724
KC20	188.966	1570351	189.974	189.974	-0.2234	190	C9H4OP2	9	9	4	0	1	2	0	0.111	0.444	0	0	1	-1.33	7.67549
KC22	188.983	3563141	189.99	189.99	0.2797	190	C9H2O5	9	9	2	0	5	0	0	0.556	0.222	0	0	1	0.89	20.33
KC9	188.983	1429243	189.99	189.99	0.4902	190	C9H2O5	9	9	2	0	5	0	0	0.556	0.222	0	0	1	0.89	10.1477
KC20	189.003	1496325	190.01	190.01	0.3792	190	C10H8P2	8	10	8	0	0	2	0	0	0.8	0	0	0.8	-1.8	7.31367
KC10	189.024	3363270	190.031	190.031	-0.3543	190	C7H12O2P2	3	7	12	0	2	2	0	0.286	1.714	0	0	-0.3	-2.57	2.44574
KC10	189.077	3391649	190.084	190.084	-0.0381	190	C8H14O5	2	8	14	0	5	0	0	0.625	1.75	0	0	-1	-0.5	2.46637
KC20	189.077	1594289	190.084	190.084	0.4353	190	C8H14O5	2	8	14	0	5	0	0	0.625	1.75	0	0	-1	-0.5	7.79249
KC9	189.084	1584986	190.091	190.091	-0.2692	190	C12H15P	6	12	15	0	0	1	0	0	1.25	0	0	0.5	-1.67	11.2534
KC20	189.097	1444605	190.104	190.104	0.2717	190	C9H20P2	1	9	20	0	0	2	0	0	2.222	0	0	-0.1	-3.33	7.06087
KC6	189.15	2886193	190.157	190.157	-0.0961	190	C10H22O3	0	10	22	0	3	0	0	0.3	2.2	0	0	-0.4	-1.6	4.04234
KC20	191.006	1433053	192.013	192.013	0.2038	192	C13H5P	12	13	5	0	0	1	0	0	0.385	0	0	0.9	-0.77	7.00441
KC10	191.02	4371796	192.027	192.027	0.1234	192	C6H8O7	3	6	8	0	7	0	0	1.167	1.333	0	0	4	1	3.17913
KC20	191.04	1837619	192.047	192.047	0.2219	192	C7H14O2P2	2	7	14	0	2	2	0	0.286	2	0	0	-0.7	-2.86	8.98183
KC20	191.05	1416570	192.058	192.058	0.3198	192	C14H8O	11	14	8	0	1	0	0	0.071	0.571	0	0	0.8	-0.43	6.92384
KC20	191.092	2018581	192.1	192.1	-0.0901	192	C8H16O5	1	8	16	0	5	0	0	0.625	2	0	0	-1.3	-0.75	9.86632
KC9	191.112	1565883	192.12	192.12	-0.252	192	C9H22P2	0	9	22	0	0	2	0	0	2.444	0	0	-0.3	-3.56	11.1178
KC9	192.991	1744342	193.998	193.998	0.2647	194	C5H7O6P	3	5	7	0	6	1	0	1.2	1.4	0	0	2	0	12.3849
KC12	193.014	3233623	194.021	194.022	-0.2937	194	C9H6O5	7	9	6	0	5	0	0	0.556	0.667	0	0	0.5	0.44	6.46483
KC9	193.123	1458487	194.131	194.131	0.0334	194	C12H18O2	4	12	18	0	2	0	0	0.167	1.5	0	0	0.2	-1.17	10.3553
KC9	194.012	1537416	195.02	195.02	-0.1905	195	C7H6N3O2P	7	7	6	3	2	1	0	0.286	0.857	0.4286	0	1	0.29	10.9157
KC20	195.013	1521963	196.021	196.021	0.3947	196	C9H10OP2	6	9	10	0	1	2	0	0.111	1.111	0	0	0.5	-2	7.43898
KC13	195.024	3267992	196.031	196.031	0.0315	196	C16H4	15	16	4	0	0	0	0	0	0.25	0	0	0.9	-0.25	14.6961
KC16	195.03	3746398	196.037	196.037	0.3721	196	C9H8O5	6	9	8	0	5	0	0	0.556	0.889	0	0	0.2	0.22	11.9272
KC3	195.03	4197046	196.037	196.037	0.3721	196	C9H8O5	6	9	8	0	5	0	0	0.556	0.889	0	0	0.2	0.22	13.3525
KC20	195.043	1562688	196.05	196.05	-0.3786	196	C6H13O5P	1	6	13	0	5	1	0	0.833	2.167	0	0	-999	-1.33	7.63803
KC12	195.043	3104890	196.05	196.05	-0.0215	196	C6H13O5P	1	6	13	0	5	1	0	0.833	2.167	0	0	-999	-1.33	6.20746
KC20	195.051	1482630	196.058	196.058	-0.4408	196	C6H12O7	1	6	12	0	7	0	0	1.167	2	0	0	6	0.33	7.24673
KC20	195.058	1648460	196.065	196.065	0.3552	196	C10H13O2P	5	10	13	0	2	1	0	0.2	1.3	0	0	0.3	-1.4	8.05726
KC15	195.066	3980865	196.074	196.074	-0.1151	196	C10H12O4	5	10	12	0	4	0	0	0.4	1.2	0	0	0.2	-0.4	13.3959
KC10	195.066	3437793	196.074	196.074	0.4459	196	C10H12O4	5	10	12	0	4	0	0	0.4	1.2	0	0	0.2	-0.4	2.49993
KC16	195.066	3663626	196.074	196.074	0.4969	196	C10H12O4	5	10	12	0	4	0	0	0.4	1.2	0	0	0.2	-0.4	11.6637
KC2	195.118	3086520	196.125	196.125	-0.2764	196	C15H16	8	15	16	0	0	0	0	0	1.067	0	0	0.5	-1.07	8.6531
KC9	196.965	1428836	197.972	197.972	-0.0702	198	C7H3O5P	7	7	3	0	5	1	0	0.714	0.429	0	0	1	0.29	10.1448
KC3	197.046	4032415	198.053	198.053	0.2165	198	C9H10O5	5	9	10	0	5	0	0	0.556	1.111	0	0	0	0	12.8287
KC15	197.046	3877917	198.053	198.053	0.3175	198	C9H10O5	5	9	10	0	5	0	0	0.556	1.111	0	0	0	0	13.0494
KC18	197.061	3401200	198.068	198.068	-0.0165	198	C13H10O2	9	13	10	0	2	0	0	0.154	0.769	0	0	0.6	-0.46	20.5084
KC15	197.082	4217004	198.089	198.089	-0.2657	198	C10H14O4	4	10	14	0	4	0	0	0.4	1.4	0	0	0	-0.6	14.1905
KC10	197.082	3530685	198.089	198.089	-0.0133	198	C10H14O4	4	10	14	0	4	0	0	0.4	1.4	0	0	0	-0.6	2.56748
KC3	197.082	3687482	198.089	198.089	0.0877	198	C10H14O4	4	10	14	0	4	0	0	0.4	1.4	0	0	0	-0.6	11.7314
KC16	197.082	3724581	198.089	198.089	0.3906	198	C10H14O4	4	10	14	0	4	0	0	0.4	1.4	0	0	0	-0.6	11.8578
KC20	198.988	1544860	199.996	199.996	-0.2808	200	C7H4O7	6	7	4	0	7	0	0	1	0.571	0	0	-999	1.43	7.55089
KC9	198.988	1511945	199.996	199.996	0.0692	200	C7H4O7	6	7	4	0	7	0	0	1	0.571	0	0	-999	1.43	10.7348
KC3	199.061	4207097	200.069	200.068	0.314	200	C9H12O5	4	9	12	0	5	0	0	0.556	1.333	0	0	-0.2	-0.22	13.3845
KC3	199.098	4030107	200.105	200.105	0.2364	200	C10H16O4	3	10	16	0	4	0	0	0.4	1.6	0	0	-0.2	-0.8	12.8214
KC20	199.17	1438510	200.178	200.178	-0.4681	200	C12H24O2	1	12	24	0	2	0	0	0.167	2	0	0	-0.1	-1.67	7.03108
KC20	200.002	1510097	201.009	201.009	0.336	201	C9H4N3OP	10	9	4	3	1	1	0	0.111	0.444	0.3333	0	1.2	0.22	7.38098
KC2	201.056	3752097	202.063	202.063	-0.4349	202	C12H10O3	8	12	10	0	3	0	0	0.25	0.833	0	0	0.6	-0.33	10.519
KC20	201.069	1530305	202.076	202.076	-0.0744	202	C9H15O3P	3	9	15	0	3	1	0	0.333	1.667	0	0	-0.2	-1.56	7.47975
KC3	201.077	4033934	202.084	202.084	0.2116	202	C9H14O5	3	9	14	0	5	0	0	0.556	1.556	0	0	-0.5	-0.44	12.8336
KC9	201.092	1459987	202.099	202.099	0.4285	202	C13H14O2	7	13	14	0	2	0	0	0.154	1.077	0	0	0.5	-0.77	10.3659
KC2	201.128	3124008	202.136	202.136	-0.4398	202	C14H18O	6	14	18	0	1	0	0	0.071	1.286	0	0	0.4	-1.14	8.75819
KC9	203.027	1769918	204.034	204.034	-0.0991	204	C11H9O2P	8	11	9	0	2	1	0	0.182	0.818	0	0	0.6	-0.91	12.5665
KC20	203.051	1424331	204.058	204.058	-0.4939	204	C7H14N2OP2	3	7	14	2	1	2	0	0.143	2	0.2857	0	-1	-2.29	6.96178
KC20	203.1	1604085	204.107	204.107	-0.0061	204	C13H17P	6	13	17	0	0	1	0	0	1.308	0	0	0.4	-1.69	7.84037
KC3	203.108	3520111	204.115	204.115	0.424	204	C13H16O2	6	13	16	0	2	0	0	0.154	1.231	0	0	0.4	-0.92	11.1989
KC20	204.071	1719994	205.079	205.079	-0.0091	205	C8H17NOP2	2	8	17	1	1	2	0	0.125	2.125	0.125	0	-0.5	-2.75	8.4069
KC10	205.051	3457085	206.058	206.058	0.0364	206	C11H10O4	7	11	10	0	4	0	0	0.364	0.909	0	0	0.4	-0.18	2.51396
KC1	205.128	3615028	206.135	206.135	-0.1381	206	C10H24P2	0	10	24	0	0	2	0	0	2.4	0	0	-0.2	-3.4	16.6266
KC20	206.031	1457389	207.038	207.038	-0.4122	207	C6H9NO7	3	6	9	1	7	0	0	1.167	1.5	0.1667	0	2.5	1.33	7.12336
KC3	207.03	3692483	208.037	208.037	0.3506	208	C10H8O5	7	10	8	0	5	0	0	0.5	0.8	0	0	0.4	0.2	11.7473
KC20	207.062	1439744	208.07	208.07	0.2412	208	C6H12N2O6	2	6	12	2	6	0	0	1	2	0.3333	0	3	1	7.03711
KC3	207.066	3523699	208.074	208.074	0.1319	208	C11H12O4	6	11	12	0	4	0	0	0.364	1.091	0	0	0.3	-0.36	11.2103
KC9	207.079	1452588	208.086	208.086	-0.3831	208	C8H17O4P	1	8	17	0	4	1	0	0.5	2.125	0	0	-1.3	-1.75	10.3134
KC3	207.103	4281636	208.11	208.11	0.3456	208	C12H16O3	5	12	16	0	3	0	0	0.25	1.333	0	0	0.2	-0.83	13.6216
KC20	207.121	1644340	208.128	208.128	-0.0101	208	C5H16N6O3	1	5	16	6	3	0	0	0.6	3.2	1.2	0	2	1.6	8.03713
KC2	209.009	4412378	210.016	210.016	-0.4838	210	C9H6O6	7	9	6	0	6	0	0	0.667	0.667	0	0	0.3	0.67	12.3702
KC9	209.029	1466307	210.036	210.036	-0.0605	210	C10H12OP2	6	10	12	0	1	2	0	0.1	1.2	0	0	0.4	-2	10.4108
KC15	209.082	4072981	210.089	210.089	0.2731	210	C11H14O4	5	11	14	0	4	0	0	0.364	1.273	0	0	0.1	-0.55	13.7059
KC3	209.082	4016845	210.089	210.089	0.3683	210	C11H14O4	5	11	14	0	4	0	0	0.364	1.273	0	0	0.1	-0.55	12.7792
KC9	209.147	1545905	210.154	210.154	0.1835	210	C13H23P	3	13	23	0	0	1	0	0	1.769	0	0	0.2	-2.15	10.976
KC10	211.025	3601676	212.032	212.032	0.0864	212	C9H8O6	6	9	8	0	6	0	0	0.667	0.889	0	0	0	0.44	2.6191
KC7	211.061	6262561	212.068	212.068	-0.081	212	C10H12O5	5	10	12	0	5	0	0	0.5	1.2	0	0	0	-0.2	13.8071
KC10	211.061	5925865	212.068	212.068	0.0133	212	C10H12O5	5	10	12	0	5	0	0	0.5	1.2	0	0	0	-0.2	4.30923
KC11	211.061	5861428	212.068	212.068	0.0604	212	C10H12O5	5	10	12	0	5	0	0	0.5	1.2	0	0	0	-0.2	26.8918
KC15	211.061	10649813	212.068	212.068	0.1076	212	C10H12O5	5	10	12	0	5	0	0	0.5	1.2	0	0	0	-0.2	35.8373
KC3	211.061	10051743	212.069	212.068	0.3434	212	C10H12O5	5	10	12	0	5	0	0	0.5	1.2	0	0	0	-0.2	31.9786
KC9	211.076	1760962	212.084	212.084	-0.2514	212	C14H12O2	9	14	12	0	2	0	0	0.143	0.857	0	0	0.6	-0.57	12.5029
KC10	211.098	4024006	212.105	212.105	-0.0127	212	C11H16O4	4	11	16	0	4	0	0	0.364	1.455	0	0	0	-0.73	2.92622
KC15	211.098	3877240	212.105	212.105	0.1287	212	C11H16O4	4	11	16	0	4	0	0	0.364	1.455	0	0	0	-0.73	13.0472
KC3	211.098	5027153	212.105	212.105	0.1759	212	C11H16O4	4	11	16	0	4	0	0	0.364	1.455	0	0	0	-0.73	15.9934
KC20	212.959	1533901	213.967	213.967	-0.3202	214	C7H3O6P	7	7	3	0	6	1	0	0.857	0.429	0	0	-999	0.57	7.49733
KC6	212.99	3110002	213.997	213.997	0.0897	214	C15H3P	15	15	3	0	0	1	0	0	0.2	0	0	1	-0.53	4.3558
KC9	212.998	1613135	214.005	214.005	-0.014	214	C15H2O2	15	15	2	0	2	0	0	0.133	0.133	0	0	1	0.13	11.4533
KC6	213.004	3109081	214.011	214.011	-0.4964	214	C8H6O7	6	8	6	0	7	0	0	0.875	0.75	0	0	-1	1	4.35451
KC15	213.04	3740545	214.048	214.048	0.0386	214	C9H10O6	5	9	10	0	6	0	0	0.667	1.111	0	0	-0.3	0.22	12.5872
KC9	213.069	1448081	214.076	214.076	0.2567	214	C10H15O3P	4	10	15	0	3	1	0	0.3	1.5	0	0	0	-1.4	10.2814
KC10	213.077	4787627	214.084	214.084	0.0128	214	C10H14O5	4	10	14	0	5	0	0	0.5	1.4	0	0	-0.2	-0.4	3.48152
KC15	213.077	5514276	214.084	214.084	0.0596	214	C10H14O5	4	10	14	0	5	0	0	0.5	1.4	0	0	-0.2	-0.4	18.5559
KC3	213.077	4832022	214.084	214.084	0.0596	214	C10H14O5	4	10	14	0	5	0	0	0.5	1.4	0	0	-0.2	-0.4	15.3726
KC16	213.077	3987327	214.084	214.084	0.4332	214	C10H14O5	4	10	14	0	5	0	0	0.5	1.4	0	0	-0.2	-0.4	12.6942
KC3	213.113	3761096	214.121	214.121	-0.0129	214	C11H18O4	3	11	18	0	4	0	0	0.364	1.636	0	0	-0.1	-0.91	11.9656
KC2	213.222	3773349	214.23	214.23	-0.0433	214	C14H30O	0	14	30	0	1	0	0	0.071	2.143	0	0	-0.1	-2	10.5786
KC20	214.06	1650996	215.067	215.067	0.2097	215	C7H5N9	10	7	5	9	0	0	0	0	0.714	1.2857	0	-0.5	3.14	8.06966
KC20	215.006	1910799	216.013	216.013	-0.3743	216	C15H5P	14	15	5	0	0	1	0	0	0.333	0	0	0.9	-0.67	9.33951
KC16	215.035	3589174	216.042	216.042	0.4979	216	C12H8O4	9	12	8	0	4	0	0	0.333	0.667	0	0	0.6	0	11.4267
KC15	215.056	3632777	216.063	216.063	-0.0084	216	C9H12O6	4	9	12	0	6	0	0	0.667	1.333	0	0	-0.7	0	12.2245
KC3	215.056	3625116	216.063	216.063	0.3156	216	C9H12O6	4	9	12	0	6	0	0	0.667	1.333	0	0	-0.7	0	11.5329
KC10	215.093	3624476	216.1	216.1	0.4289	216	C10H16O5	3	10	16	0	5	0	0	0.5	1.6	0	0	-0.4	-0.6	2.63568
KC9	215.144	1683110	216.151	216.151	-0.3653	216	C15H20O	6	15	20	0	1	0	0	0.067	1.333	0	0	0.4	-1.2	11.9501
KC8	217.03	6360647	218.037	218.037	0.4443	218	C15H6O2	13	15	6	0	2	0	0	0.133	0.4	0	0	0.8	-0.13	8.77406
KC15	217.051	3997883	218.058	218.058	0.0344	218	C12H10O4	8	12	10	0	4	0	0	0.333	0.833	0	0	0.5	-0.17	13.4531
KC9	217.066	1663388	218.073	218.073	-0.1313	218	C16H10O	12	16	10	0	1	0	0	0.062	0.625	0	0	0.7	-0.5	11.8101
KC10	217.072	3570464	218.079	218.079	0.0831	218	C9H14O6	3	9	14	0	6	0	0	0.667	1.556	0	0	-1	-0.22	2.59641
KC16	217.072	3687950	218.079	218.079	0.45	218	C9H14O6	3	9	14	0	6	0	0	0.667	1.556	0	0	-1	-0.22	11.7411
KC3	217.087	3693217	218.094	218.094	-0.0367	218	C13H14O3	7	13	14	0	3	0	0	0.231	1.077	0	0	0.4	-0.62	11.7496
KC9	217.16	1630834	218.167	218.167	0.3253	218	C15H22O	5	15	22	0	1	0	0	0.067	1.467	0	0	0.3	-1.33	11.579
KC20	219.006	1508890	220.014	220.014	-0.0396	220	C7H9O6P	4	7	9	0	6	1	0	0.857	1.286	0	0	-999	-0.29	7.37508
KC15	219.03	4215299	220.037	220.037	-0.0321	220	C11H8O5	8	11	8	0	5	0	0	0.455	0.727	0	0	0.5	0.18	14.1848
KC14	219.03	3883501	220.037	220.037	0.377	220	C11H8O5	8	11	8	0	5	0	0	0.455	0.727	0	0	0.5	0.18	8.72448
KC20	219.034	1757875	220.042	220.042	-0.4181	220	C8H14O3P2	3	8	14	0	3	2	0	0.375	1.75	0	0	-0.7	-2.25	8.59206
KC9	219.034	1843363	220.042	220.042	-0.2363	220	C8H14O3P2	3	8	14	0	3	2	0	0.375	1.75	0	0	-0.7	-2.25	13.0879
KC10	219.066	3710125	220.074	220.074	0.1247	220	C12H12O4	7	12	12	0	4	0	0	0.333	1	0	0	0.4	-0.33	2.69797
KC15	219.066	3855006	220.074	220.074	0.3064	220	C12H12O4	7	12	12	0	4	0	0	0.333	1	0	0	0.4	-0.33	12.9724
KC9	219.094	1721562	220.102	220.102	-0.0267	220	C13H17OP	6	13	17	0	1	1	0	0.077	1.308	0	0	0.4	-1.54	12.2231
KC10	219.103	3801472	220.11	220.11	0.0996	220	C13H16O3	6	13	16	0	3	0	0	0.231	1.231	0	0	0.3	-0.77	2.76439
KC3	219.103	4566446	220.11	220.11	0.145	220	C13H16O3	6	13	16	0	3	0	0	0.231	1.231	0	0	0.3	-0.77	14.5277
KC9	219.144	1726406	220.151	220.151	0.4155	220	C11H26P2	0	11	26	0	0	2	0	0	2.364	0	0	-0.2	-3.27	12.2575
KC18	220.988	3602757	221.995	221.995	-0.0101	222	C13H2O4	13	13	2	0	4	0	0	0.308	0.154	0	0	1	0.46	21.7238
KC6	221.014	3418004	222.021	222.021	-0.3448	222	C7H12O4P2	3	7	12	0	4	2	0	0.571	1.714	0	0	-3	-2	4.78718
KC10	221.045	3603662	222.053	222.053	-0.4374	222	C11H10O5	7	11	10	0	5	0	0	0.455	0.909	0	0	0.3	0	2.62055
KC3	221.046	4617866	222.053	222.053	0.103	222	C11H10O5	7	11	10	0	5	0	0	0.455	0.909	0	0	0.3	0	14.6913
KC9	221.065	1497024	222.073	222.073	-0.082	222	C12H16P2	6	12	16	0	0	2	0	0	1.333	0	0	0.4	-2.17	10.6289
KC3	221.082	5732143	222.089	222.089	0.2133	222	C12H14O4	6	12	14	0	4	0	0	0.333	1.167	0	0	0.2	-0.5	18.2362
KC15	221.082	4799391	222.089	222.089	0.3934	222	C12H14O4	6	12	14	0	4	0	0	0.333	1.167	0	0	0.2	-0.5	16.1503
KC3	221.118	4078547	222.126	222.126	0.2785	222	C13H18O3	5	13	18	0	3	0	0	0.231	1.385	0	0	0.2	-0.92	12.9755
KC11	221.155	6025399	222.162	222.162	-0.1515	222	C14H22O2	4	14	22	0	2	0	0	0.143	1.571	0	0	0.2	-1.29	27.6441
KC7	221.155	6548347	222.162	222.162	-0.0614	222	C14H22O2	4	14	22	0	2	0	0	0.143	1.571	0	0	0.2	-1.29	14.4372
KC15	221.155	9416906	222.162	222.162	0.2537	222	C14H22O2	4	14	22	0	2	0	0	0.143	1.571	0	0	0.2	-1.29	31.6885
KC10	221.155	6031157	222.162	222.162	0.3887	222	C14H22O2	4	14	22	0	2	0	0	0.143	1.571	0	0	0.2	-1.29	4.3858
KC3	221.155	8724600	222.162	222.162	0.4337	222	C14H22O2	4	14	22	0	2	0	0	0.143	1.571	0	0	0.2	-1.29	27.7564
KC4	221.191	3720651	222.198	222.198	-0.2212	222	C15H26O	3	15	26	0	1	0	0	0.067	1.733	0	0	0.1	-1.6	8.62905
KC9	223.008	1815650	224.016	224.016	0.2801	224	C10H10O2P2	7	10	10	0	2	2	0	0.2	1	0	0	0.5	-1.6	12.8912
KC15	223.04	3814053	224.047	224.047	-0.1242	224	C14H8O3	11	14	8	0	3	0	0	0.214	0.571	0	0	0.7	-0.14	12.8345
KC3	223.061	5252509	224.069	224.068	0.1465	224	C11H12O5	6	11	12	0	5	0	0	0.455	1.091	0	0	0.2	-0.18	16.7103
KC9	223.066	1614739	224.073	224.073	0.4368	224	C8H18O3P2	1	8	18	0	3	2	0	0.375	2.25	0	0	-1.3	-2.75	11.4647
KC3	223.098	5100092	224.105	224.105	0.1218	224	C12H16O4	5	12	16	0	4	0	0	0.333	1.333	0	0	0.1	-0.67	16.2254
KC15	223.098	5286795	224.105	224.105	0.3896	224	C12H16O4	5	12	16	0	4	0	0	0.333	1.333	0	0	0.1	-0.67	17.7904
KC20	223.162	1549498	224.169	224.169	-0.2744	224	C14H25P	3	14	25	0	0	1	0	0	1.786	0	0	0.2	-2.14	7.57356
KC3	225.041	3832516	226.048	226.048	0.3462	226	C10H10O6	6	10	10	0	6	0	0	0.6	1	0	0	0	0.2	12.1928
KC9	225.069	1573425	226.076	226.076	0.3316	226	C11H15O3P	5	11	15	0	3	1	0	0.273	1.364	0	0	0.1	-1.27	11.1714
KC10	225.077	4117081	226.084	226.084	0.0122	226	C11H14O5	5	11	14	0	5	0	0	0.455	1.273	0	0	0	-0.36	2.9939
KC15	225.077	5697957	226.084	226.084	0.1891	226	C11H14O5	5	11	14	0	5	0	0	0.455	1.273	0	0	0	-0.36	19.174
KC3	225.077	6742877	226.084	226.084	0.2776	226	C11H14O5	5	11	14	0	5	0	0	0.455	1.273	0	0	0	-0.36	21.4518
KC9	225.084	1803326	226.091	226.091	0.039	226	C15H15P	9	15	15	0	0	1	0	0	1	0	0	0.6	-1.33	12.8037
KC20	225.097	1744143	226.104	226.104	0.0073	226	C12H20P2	4	12	20	0	0	2	0	0	1.667	0	0	0.2	-2.5	8.52494
KC9	226.93	1661981	227.938	227.938	-0.3547	228	C7H2O5P2	8	7	2	0	5	2	0	0.714	0.286	0	0	-999	-0.29	11.8001
KC20	226.938	1724646	227.945	227.945	0.3299	228	C11H3P3	12	11	3	0	0	3	0	0	0.273	0	0	1.1	-1.64	8.42964
KC20	226.983	1729291	227.991	227.991	-0.0912	228	C8H4O8	7	8	4	0	8	0	0	1	0.5	0	0	-999	1.5	8.45235
KC20	226.988	1548814	227.995	227.995	-0.2166	228	C8HN6OP	12	8	1	6	1	1	0	0.125	0.125	0.75	0	-999	1.75	7.57022
KC3	227.056	4793090	228.063	228.063	0.4306	228	C10H12O6	5	10	12	0	6	0	0	0.6	1.2	0	0	-0.2	0	15.2487
KC16	227.056	4108222	228.063	228.063	0.4744	228	C10H12O6	5	10	12	0	6	0	0	0.6	1.2	0	0	-0.2	0	13.0791
KC3	227.093	7628690	228.1	228.1	0.1433	228	C11H16O5	4	11	16	0	5	0	0	0.455	1.455	0	0	-0.2	-0.55	24.2699
KC15	227.093	4028117	228.1	228.1	0.2748	228	C11H16O5	4	11	16	0	5	0	0	0.455	1.455	0	0	-0.2	-0.55	13.5549
KC10	227.093	5617768	228.1	228.1	0.2748	228	C11H16O5	4	11	16	0	5	0	0	0.455	1.455	0	0	-0.2	-0.55	4.08519
KC20	228.942	1567494	229.95	229.95	-0.4147	230	C11H2O2S2	11	11	2	0	2	0	2	0.182	0.182	0	0.1818	1	0.55	7.66152
KC14	229.014	3725659	230.022	230.022	0.2739	230	C12H6O5	10	12	6	0	5	0	0	0.417	0.5	0	0	0.7	0.33	8.36988
KC20	229.034	1532748	230.041	230.041	-0.3829	230	C13H12P2	9	13	12	0	0	2	0	0	0.923	0	0	0.6	-1.69	7.49169
KC11	229.072	4826094	230.079	230.079	-0.2254	230	C10H14O6	4	10	14	0	6	0	0	0.6	1.4	0	0	-0.5	-0.2	22.1418
KC15	229.072	10626524	230.079	230.079	0.0788	230	C10H14O6	4	10	14	0	6	0	0	0.6	1.4	0	0	-0.5	-0.2	35.759
KC10	229.072	20873122	230.079	230.079	0.2527	230	C10H14O6	4	10	14	0	6	0	0	0.6	1.4	0	0	-0.5	-0.2	15.1787
KC3	229.072	12255615	230.079	230.079	0.2527	230	C10H14O6	4	10	14	0	6	0	0	0.6	1.4	0	0	-0.5	-0.2	38.99
KC9	230.998	1492771	232.005	232.005	-0.2435	232	C8H10O4P2	5	8	10	0	4	2	0	0.5	1.25	0	0	-0.5	-1.5	10.5987
KC9	231.006	1540137	232.014	232.014	-0.1237	232	C8H9O6P	5	8	9	0	6	1	0	0.75	1.125	0	0	-2	-0.25	10.935
KC20	231.022	1614547	232.029	232.029	-0.495	232	C12H9O3P	9	12	9	0	3	1	0	0.25	0.75	0	0	0.6	-0.67	7.89151
KC9	231.043	1709635	232.05	232.05	-0.2767	232	C9H13O5P	4	9	13	0	5	1	0	0.556	1.444	0	0	-0.7	-0.89	12.1384
KC9	231.082	1605470	232.089	232.089	-0.0806	232	C17H12O	12	17	12	0	1	0	0	0.059	0.706	0	0	0.7	-0.59	11.3989
KC15	231.087	3959687	232.095	232.095	0.2933	232	C10H16O6	3	10	16	0	6	0	0	0.6	1.6	0	0	-0.8	-0.4	13.3246
KC15	231.103	3707830	232.11	232.11	0.2237	232	C14H16O3	7	14	16	0	3	0	0	0.214	1.143	0	0	0.4	-0.71	12.4771
KC20	231.103	1763918	232.11	232.11	0.2237	232	C14H16O3	7	14	16	0	3	0	0	0.214	1.143	0	0	0.4	-0.71	8.62159
KC9	231.144	1580426	232.151	232.151	-0.166	232	C12H26P2	1	12	26	0	0	2	0	0	2.167	0	0	-0.1	-3	11.2211
KC20	233.04	1599520	234.047	234.047	0.2825	234	C19H6	17	19	6	0	0	0	0	0	0.316	0	0	0.9	-0.32	7.81806
KC3	233.046	3960744	234.053	234.053	0.3968	234	C12H10O5	8	12	10	0	5	0	0	0.417	0.833	0	0	0.4	0	12.6007
KC20	233.155	1598190	234.162	234.162	0.4115	234	C15H22O2	5	15	22	0	2	0	0	0.133	1.467	0	0	0.2	-1.2	7.81156
KC20	234.017	1574064	235.025	235.025	0.2649	235	C7H10NO6P	4	7	10	1	6	1	0	0.857	1.429	0.1429	0	4	0	7.69363
KC9	234.987	1489653	235.994	235.994	-0.1182	236	C14H6P2	13	14	6	0	0	2	0	0	0.429	0	0	0.9	-1.14	10.5766
KC6	234.988	3266862	235.996	235.996	-0.4922	236	C10H4O7	9	10	4	0	7	0	0	0.7	0.4	0	0	0.7	1	4.5755
KC9	235.004	1551487	236.011	236.011	-0.0945	236	C14H4O4	13	14	4	0	4	0	0	0.286	0.286	0	0	0.9	0.29	11.0156
KC9	235.045	1494679	236.052	236.052	-0.3506	236	C12H14OP2	7	12	14	0	1	2	0	0.083	1.167	0	0	0.4	-1.83	10.6123
KC15	235.061	3931096	236.069	236.068	0.2237	236	C12H12O5	7	12	12	0	5	0	0	0.417	1	0	0	0.3	-0.17	13.2284
KC10	235.061	3853572	236.069	236.068	0.3932	236	C12H12O5	7	12	12	0	5	0	0	0.417	1	0	0	0.3	-0.17	2.80228
KC3	235.061	5900208	236.069	236.068	0.4355	236	C12H12O5	7	12	12	0	5	0	0	0.417	1	0	0	0.3	-0.17	18.7709
KC20	235.089	1486821	236.097	236.097	-0.2138	236	C13H17O2P	6	13	17	0	2	1	0	0.154	1.308	0	0	0.3	-1.38	7.26721
KC10	235.098	4191622	236.105	236.105	0.158	236	C13H16O4	6	13	16	0	4	0	0	0.308	1.231	0	0	0.2	-0.62	3.04811
KC15	235.098	4771894	236.105	236.105	0.2004	236	C13H16O4	6	13	16	0	4	0	0	0.308	1.231	0	0	0.2	-0.62	16.0577
KC3	235.098	4752409	236.105	236.105	0.2427	236	C13H16O4	6	13	16	0	4	0	0	0.308	1.231	0	0	0.2	-0.62	15.1193
KC15	235.134	3784850	236.141	236.141	-0.0347	236	C14H20O3	5	14	20	0	3	0	0	0.214	1.429	0	0	0.2	-1	12.7363
KC3	235.134	4655234	236.141	236.141	0.2193	236	C14H20O3	5	14	20	0	3	0	0	0.214	1.429	0	0	0.2	-1	14.8102
KC20	236.975	1494371	237.982	237.982	-0.3557	238	C13H3O3P	13	13	3	0	3	1	0	0.231	0.231	0	0	1	-0.15	7.30411
KC20	236.99	1657452	237.997	237.997	0.3748	238	C17H3P	17	17	3	0	0	1	0	0	0.176	0	0	1	-0.47	8.10121
KC9	237.019	1624079	238.027	238.027	0.4942	238	C14H6O4	12	14	6	0	4	0	0	0.286	0.429	0	0	0.8	0.14	11.531
KC3	237.041	4212936	238.048	238.048	0.4968	238	C11H10O6	7	11	10	0	6	0	0	0.545	0.909	0	0	0.2	0.18	13.403
KC15	237.077	5509830	238.084	238.084	0.1796	238	C12H14O5	6	12	14	0	5	0	0	0.417	1.167	0	0	0.1	-0.33	18.5409
KC10	237.077	4709321	238.084	238.084	0.1796	238	C12H14O5	6	12	14	0	5	0	0	0.417	1.167	0	0	0.1	-0.33	3.42457
KC3	237.077	6755621	238.084	238.084	0.2636	238	C12H14O5	6	12	14	0	5	0	0	0.417	1.167	0	0	0.1	-0.33	21.4923
KC20	237.097	1713835	238.104	238.104	0.217	238	C13H20P2	5	13	20	0	0	2	0	0	1.538	0	0	0.3	-2.31	8.3768
KC15	237.113	5038872	238.121	238.121	0.0304	238	C13H18O4	5	13	18	0	4	0	0	0.308	1.385	0	0	0.1	-0.77	16.9561
KC9	237.113	1493058	238.121	238.121	0.1564	238	C13H18O4	5	13	18	0	4	0	0	0.308	1.385	0	0	0.1	-0.77	10.6007
KC3	237.113	4287874	238.121	238.121	0.3244	238	C13H18O4	5	13	18	0	4	0	0	0.308	1.385	0	0	0.1	-0.77	13.6414
KC9	237.165	1656927	238.172	238.172	-0.1025	238	C18H22	8	18	22	0	0	0	0	0	1.222	0	0	0.4	-1.22	11.7642
KC20	238.995	1498836	240.002	240.002	-0.2486	240	C10H11OP3	7	10	11	0	1	3	0	0.1	1.1	0	0	0.5	-2.4	7.32594
KC20	239.014	1548510	240.021	240.021	0.1122	240	C17H4O2	16	17	4	0	2	0	0	0.118	0.235	0	0	0.9	0	7.56873
KC20	239.05	1532402	240.057	240.058	-0.369	240	C18H8O	15	18	8	0	1	0	0	0.056	0.444	0	0	0.8	-0.33	7.49
KC20	239.055	1864180	240.062	240.062	-0.3342	240	C5H13N4O5P	2	5	13	4	5	1	0	1	2.6	0.8	0	1.6	0.8	9.11165
KC20	239.056	2058997	240.063	240.063	-0.2158	240	C11H12O6	6	11	12	0	6	0	0	0.545	1.091	0	0	0	0	10.0639
KC3	239.056	4581819	240.063	240.063	0.3257	240	C11H12O6	6	11	12	0	6	0	0	0.545	1.091	0	0	0	0	14.5766
KC15	239.056	4254465	240.063	240.063	0.409	240	C11H12O6	6	11	12	0	6	0	0	0.545	1.091	0	0	0	0	14.3166
KC10	239.093	5702504	240.1	240.1	0.0112	240	C12H16O5	5	12	16	0	5	0	0	0.417	1.333	0	0	0	-0.5	4.14681
KC15	239.093	4559688	240.1	240.1	0.1778	240	C12H16O5	5	12	16	0	5	0	0	0.417	1.333	0	0	0	-0.5	15.3437
KC3	239.093	7899149	240.1	240.1	0.386	240	C12H16O5	5	12	16	0	5	0	0	0.417	1.333	0	0	0	-0.5	25.1304
KC16	239.093	4483796	240.1	240.1	0.4277	240	C12H16O5	5	12	16	0	5	0	0	0.417	1.333	0	0	0	-0.5	14.2748
KC3	239.129	3855454	240.136	240.136	0.1965	240	C13H20O4	4	13	20	0	4	0	0	0.308	1.538	0	0	0	-0.92	12.2657
KC9	240.978	1563329	241.985	241.985	-0.0061	242	C12H2O6	12	12	2	0	6	0	0	0.5	0.167	0	0	1	0.83	11.0997
KC20	241.006	1636065	242.013	242.013	0.4348	242	C13H7O3P	11	13	7	0	3	1	0	0.231	0.538	0	0	0.8	-0.46	7.99668
KC10	241.072	6600621	242.079	242.079	0.0749	242	C11H14O6	5	11	14	0	6	0	0	0.545	1.273	0	0	-0.2	-0.18	4.79991
KC15	241.072	6785341	242.079	242.079	0.2814	242	C11H14O6	5	11	14	0	6	0	0	0.545	1.273	0	0	-0.2	-0.18	22.8331
KC3	241.072	7755839	242.079	242.079	0.3228	242	C11H14O6	5	11	14	0	6	0	0	0.545	1.273	0	0	-0.2	-0.18	24.6744
KC1	241.085	3688656	242.092	242.092	0.1279	242	C8H19O6P	0	8	19	0	6	1	0	0.75	2.375	0	0	-7	-1.5	16.9652
KC15	241.108	4657530	242.115	242.115	0.2999	242	C12H18O5	4	12	18	0	5	0	0	0.417	1.5	0	0	-0.1	-0.67	15.6729
KC10	241.108	5355526	242.116	242.115	0.4239	242	C12H18O5	4	12	18	0	5	0	0	0.417	1.5	0	0	-0.1	-0.67	3.89449
KC3	241.108	5087366	242.116	242.115	0.4239	242	C12H18O5	4	12	18	0	5	0	0	0.417	1.5	0	0	-0.1	-0.67	16.1849
KC9	241.136	1523207	242.144	242.144	0.1624	242	C13H23O2P	3	13	23	0	2	1	0	0.154	1.769	0	0	0	-1.85	10.8148
KC10	241.145	4583518	242.152	242.152	0.112	242	C13H22O4	3	13	22	0	4	0	0	0.308	1.692	0	0	-0.1	-1.08	3.33309
KC15	241.145	6222262	242.152	242.152	0.2359	242	C13H22O4	3	13	22	0	4	0	0	0.308	1.692	0	0	-0.1	-1.08	20.9383
KC3	241.145	6459597	242.152	242.152	0.401	242	C13H22O4	3	13	22	0	4	0	0	0.308	1.692	0	0	-0.1	-1.08	20.5506
KC9	242.962	1806597	243.969	243.969	-0.086	244	C8H6O5P2	7	8	6	0	5	2	0	0.625	0.75	0	0	0	-0.75	12.8269
KC9	242.964	1656582	243.971	243.971	-0.4507	244	C15HO2P	16	15	1	0	2	1	0	0.133	0.067	0	0	1.1	-0.13	11.7618
KC20	242.977	1505667	243.984	243.984	-0.0292	244	C12H6O2P2	11	12	6	0	2	2	0	0.167	0.5	0	0	0.9	-1	7.35933
KC20	243.03	1581851	244.037	244.037	-0.0289	244	C13H8O5	10	13	8	0	5	0	0	0.385	0.615	0	0	0.6	0.15	7.7317
KC9	243.03	1503008	244.037	244.037	0.3399	244	C13H8O5	10	13	8	0	5	0	0	0.385	0.615	0	0	0.6	0.15	10.6714
KC20	243.05	1740452	244.057	244.057	0.2534	244	C14H14P2	9	14	14	0	0	2	0	0	1	0	0	0.6	-1.71	8.5069
KC10	243.087	4654459	244.095	244.095	0.074	244	C11H16O6	4	11	16	0	6	0	0	0.545	1.455	0	0	-0.4	-0.36	3.38468
KC15	243.087	4097352	244.095	244.095	0.1969	244	C11H16O6	4	11	16	0	6	0	0	0.545	1.455	0	0	-0.4	-0.36	13.7879
KC3	243.087	5250673	244.095	244.095	0.2789	244	C11H16O6	4	11	16	0	6	0	0	0.545	1.455	0	0	-0.4	-0.36	16.7045
KC3	243.103	3937931	244.11	244.11	0.3356	244	C15H16O3	8	15	16	0	3	0	0	0.2	1.067	0	0	0.4	-0.67	12.5281
KC10	243.124	3844551	244.131	244.131	0.2972	244	C12H20O5	3	12	20	0	5	0	0	0.417	1.667	0	0	-0.3	-0.83	2.79572
KC9	244.948	1772013	245.955	245.955	-0.0385	246	C11H5OP3	11	11	5	0	1	3	0	0.091	0.455	0	0	1	-1.64	12.5813
KC8	245.037	4270412	246.045	246.045	-0.02	246	C13H11O3P	9	13	11	0	3	1	0	0.231	0.846	0	0	0.6	-0.77	5.89073
KC20	245.037	1534967	246.045	246.045	0.102	246	C13H11O3P	9	13	11	0	3	1	0	0.231	0.846	0	0	0.6	-0.77	7.50254
KC2	245.037	3883369	246.045	246.045	0.4271	246	C13H11O3P	9	13	11	0	3	1	0	0.231	0.846	0	0	0.6	-0.77	10.8871
KC3	245.046	4562464	246.053	246.053	0.2149	246	C13H10O5	9	13	10	0	5	0	0	0.385	0.769	0	0	0.5	0	14.515
KC15	245.067	3962644	246.074	246.074	0.4613	246	C10H14O7	4	10	14	0	7	0	0	0.7	1.4	0	0	-1	0	13.3346
KC15	245.082	4284198	246.089	246.089	0.1519	246	C14H14O4	8	14	14	0	4	0	0	0.286	1	0	0	0.4	-0.43	14.4166
KC10	245.103	4017299	246.11	246.11	0.3169	246	C11H18O6	3	11	18	0	6	0	0	0.545	1.636	0	0	-0.6	-0.55	2.92134
KC15	245.103	3807038	246.11	246.11	0.4388	246	C11H18O6	3	11	18	0	6	0	0	0.545	1.636	0	0	-0.6	-0.55	12.8109
KC9	245.103	1594916	246.11	246.11	0.4388	246	C11H18O6	3	11	18	0	6	0	0	0.545	1.636	0	0	-0.6	-0.55	11.3239
KC3	245.118	4006533	246.126	246.126	0.1295	246	C15H18O3	7	15	18	0	3	0	0	0.2	1.2	0	0	0.3	-0.8	12.7464
KC9	246.02	1700186	247.028	247.028	-0.1171	247	C7H11N3O3P2	5	7	11	3	3	2	0	0.429	1.571	0.4286	0	3	-0.86	12.0714
KC9	246.241	1587362	247.249	247.248	0.2521	247	C10H29N7	0	10	29	7	0	0	0	0	2.9	0.7	0	-2.3	-0.8	11.2703
KC9	246.965	1636230	247.972	247.972	0.1298	248	C7H5O8P	6	7	5	0	8	1	0	1.143	0.714	0	0	1.5	0.86	11.6173
KC9	246.989	1537678	247.996	247.996	0.4187	248	C11H4O7	10	11	4	0	7	0	0	0.636	0.364	0	0	0.8	0.91	10.9175
KC9	247.004	1857170	248.011	248.011	0.152	248	C15H4O4	14	15	4	0	4	0	0	0.267	0.267	0	0	0.9	0.27	13.1859
KC20	247.017	1542393	248.024	248.024	-0.1591	248	C12H9O4P	9	12	9	0	4	1	0	0.333	0.75	0	0	0.6	-0.5	7.53883
KC20	247.04	1675010	248.047	248.047	-0.1525	248	C16H8O3	13	16	8	0	3	0	0	0.188	0.5	0	0	0.8	-0.12	8.18703
KC15	247.061	3955465	248.069	248.068	0.2129	248	C13H12O5	8	13	12	0	5	0	0	0.385	0.923	0	0	0.4	-0.15	13.3104
KC20	247.071	1783565	248.079	248.079	-0.1975	248	C6H13N6O3P	4	6	13	6	3	1	0	0.5	2.167	1	0	1.5	1	8.71762
KC7	247.082	6872493	248.09	248.09	0.0139	248	C10H16O7	3	10	16	0	7	0	0	0.7	1.6	0	0	-1.3	-0.2	15.1518
KC15	247.082	6651676	248.09	248.09	0.2557	248	C10H16O7	3	10	16	0	7	0	0	0.7	1.6	0	0	-1.3	-0.2	22.3833
KC3	247.082	10255408	248.09	248.09	0.3364	248	C10H16O7	3	10	16	0	7	0	0	0.7	1.6	0	0	-1.3	-0.2	32.6266
KC10	247.082	24327396	248.09	248.09	0.3767	248	C10H16O7	3	10	16	0	7	0	0	0.7	1.6	0	0	-1.3	-0.2	17.6906
KC20	247.088	2034964	248.095	248.096	-0.3584	248	C8H18N4OP2	3	8	18	4	1	2	0	0.125	2.25	0.5	0	-4	-1.75	9.9464
KC15	247.098	4960042	248.105	248.105	0.3519	248	C14H16O4	7	14	16	0	4	0	0	0.286	1.143	0	0	0.3	-0.57	16.6909
KC9	247.134	1653434	248.141	248.141	0.0475	248	C15H20O3	6	15	20	0	3	0	0	0.2	1.333	0	0	0.2	-0.93	11.7394
KC20	247.155	1625132	248.162	248.162	0.0098	248	C12H24O5	1	12	24	0	5	0	0	0.417	2	0	0	-0.6	-1.17	7.94324
KC20	248.069	1669492	249.076	249.076	-0.3491	249	C12H7N7	13	12	7	7	0	0	0	0	0.583	0.5833	0	1.2	1.17	8.16006
KC20	248.922	1942681	249.929	249.929	-0.419	250	C13HP3	15	13	1	0	0	3	0	0	0.077	0	0	1.2	-1.23	9.49534
KC20	248.966	1544871	249.974	249.974	-0.2098	250	C14H4OP2	14	14	4	0	1	2	0	0.071	0.286	0	0	1	-0.86	7.55095
KC20	249.035	1514430	250.042	250.042	-0.074	250	C19H6O	17	19	6	0	1	0	0	0.053	0.316	0	0	0.9	-0.21	7.40216
KC16	249.041	4043293	250.048	250.048	0.193	250	C12H10O6	8	12	10	0	6	0	0	0.5	0.833	0	0	0.3	0.17	12.8724
KC20	249.069	1713354	250.076	250.076	0.1398	250	C13H15O3P	7	13	15	0	3	1	0	0.231	1.154	0	0	0.3	-1.08	8.37445
KC20	249.077	2095052	250.084	250.084	-0.069	250	C13H14O5	7	13	14	0	5	0	0	0.385	1.077	0	0	0.2	-0.31	10.2401
KC15	249.077	4998460	250.084	250.084	0.2509	250	C13H14O5	7	13	14	0	5	0	0	0.385	1.077	0	0	0.2	-0.31	16.8202
KC3	249.077	7111704	250.084	250.084	0.4109	250	C13H14O5	7	13	14	0	5	0	0	0.385	1.077	0	0	0.2	-0.31	22.6252
KC20	249.097	1509843	250.104	250.104	0.1666	250	C14H20P2	6	14	20	0	0	2	0	0	1.429	0	0	0.3	-2.14	7.37974
KC9	249.098	1511145	250.105	250.105	0.0935	250	C10H18O7	2	10	18	0	7	0	0	0.7	1.8	0	0	-1.7	-0.4	10.7292
KC15	249.113	5274964	250.121	250.121	0.2688	250	C14H18O4	6	14	18	0	4	0	0	0.286	1.286	0	0	0.2	-0.71	17.7506
KC3	249.113	5923897	250.121	250.121	0.3088	250	C14H18O4	6	14	18	0	4	0	0	0.286	1.286	0	0	0.2	-0.71	18.8463
KC3	249.15	3875929	250.157	250.157	0.1268	250	C15H22O3	5	15	22	0	3	0	0	0.2	1.467	0	0	0.2	-1.07	12.3309
KC9	250.975	1724089	251.982	251.982	0.4025	252	C10H5O6P	9	10	5	0	6	1	0	0.6	0.5	0	0	0.7	0.2	12.2411
KC15	251.056	4159904	252.063	252.063	0.0722	252	C12H12O6	7	12	12	0	6	0	0	0.5	1	0	0	0.2	0	13.9984
KC3	251.056	5499429	252.063	252.063	0.4292	252	C12H12O6	7	12	12	0	6	0	0	0.5	1	0	0	0.2	0	17.4959
KC9	251.071	1535791	252.079	252.079	-0.2695	252	C16H12O3	11	16	12	0	3	0	0	0.188	0.75	0	0	0.6	-0.38	10.9041
KC15	251.093	7252401	252.1	252.1	0.209	252	C13H16O5	6	13	16	0	5	0	0	0.385	1.231	0	0	0.1	-0.46	24.4048
KC10	251.093	5171924	252.1	252.1	0.3677	252	C13H16O5	6	13	16	0	5	0	0	0.385	1.231	0	0	0.1	-0.46	3.76097
KC3	251.093	7301694	252.1	252.1	0.4867	252	C13H16O5	6	13	16	0	5	0	0	0.385	1.231	0	0	0.1	-0.46	23.2296
KC9	251.112	1822937	252.12	252.12	-0.2317	252	C14H22P2	5	14	22	0	0	2	0	0	1.571	0	0	0.2	-2.29	12.9429
KC15	251.129	4565442	252.136	252.136	0.2268	252	C14H20O4	5	14	20	0	4	0	0	0.286	1.429	0	0	0.1	-0.86	15.363
KC10	251.129	3958515	252.136	252.136	0.3458	252	C14H20O4	5	14	20	0	4	0	0	0.286	1.429	0	0	0.1	-0.86	2.87859
KC3	251.129	4128342	252.136	252.136	0.3854	252	C14H20O4	5	14	20	0	4	0	0	0.286	1.429	0	0	0.1	-0.86	13.1339
KC20	253.012	1798756	254.019	254.019	-0.1103	254	C7H11O8P	3	7	11	0	8	1	0	1.143	1.571	0	0	3	0	8.79187
KC9	253.012	1853545	254.019	254.019	0.244	254	C7H11O8P	3	7	11	0	8	1	0	1.143	1.571	0	0	3	0	13.1602
KC9	253.014	1700201	254.022	254.022	0.0512	254	C14H6O5	12	14	6	0	5	0	0	0.357	0.429	0	0	0.8	0.29	12.0715
KC10	253.072	4495487	254.079	254.079	0.2682	254	C12H14O6	6	12	14	0	6	0	0	0.5	1.167	0	0	0	-0.17	3.26907
KC15	253.072	5416062	254.079	254.079	0.3075	254	C12H14O6	6	12	14	0	6	0	0	0.5	1.167	0	0	0	-0.17	18.2254
KC3	253.072	5385879	254.079	254.079	0.4649	254	C12H14O6	6	12	14	0	6	0	0	0.5	1.167	0	0	0	-0.17	17.1346
KC10	253.108	6233237	254.115	254.115	-0.029	254	C13H18O5	5	13	18	0	5	0	0	0.385	1.385	0	0	0	-0.62	4.53275
KC15	253.108	6026375	254.115	254.115	0.2858	254	C13H18O5	5	13	18	0	5	0	0	0.385	1.385	0	0	0	-0.62	20.2792
KC3	253.108	8414887	254.116	254.115	0.4038	254	C13H18O5	5	13	18	0	5	0	0	0.385	1.385	0	0	0	-0.62	26.7711
KC20	253.209	1834136	254.216	254.216	0.2687	254	C16H31P	2	16	31	0	0	1	0	0	1.938	0	0	0.1	-2.25	8.9648
KC20	254.925	1913415	255.933	255.933	0.0567	256	C8H2O6P2	9	8	2	0	6	2	0	0.75	0.25	0	0	-999	0	9.3523
KC20	254.978	1809491	255.986	255.986	0.018	256	C9H4O9	8	9	4	0	9	0	0	1	0.444	0	0	-999	1.56	8.84434
KC20	255.006	1597530	256.014	256.014	-0.4246	256	C10H9O6P	7	10	9	0	6	1	0	0.6	0.9	0	0	0	-0.2	7.80833
KC10	255.066	3758148	256.074	256.074	-0.2053	256	C15H12O4	10	15	12	0	4	0	0	0.267	0.8	0	0	0.5	-0.27	2.73289
KC15	255.087	4625880	256.095	256.095	0.0705	256	C12H16O6	5	12	16	0	6	0	0	0.5	1.333	0	0	-0.2	-0.33	15.5664
KC3	255.088	7127401	256.095	256.095	0.3439	256	C12H16O6	5	12	16	0	6	0	0	0.5	1.333	0	0	-0.2	-0.33	22.6751
KC10	255.088	6963276	256.095	256.095	0.3829	256	C12H16O6	5	12	16	0	6	0	0	0.5	1.333	0	0	-0.2	-0.33	5.06363
KC9	255.103	1665499	256.11	256.11	-0.0706	256	C16H16O3	9	16	16	0	3	0	0	0.188	1	0	0	0.5	-0.62	11.8251
KC15	255.124	3798491	256.131	256.131	-0.1852	256	C13H20O5	4	13	20	0	5	0	0	0.385	1.538	0	0	-0.1	-0.77	12.7822
KC3	255.124	4278643	256.131	256.131	0.2052	256	C13H20O5	4	13	20	0	5	0	0	0.385	1.538	0	0	-0.1	-0.77	13.6121
KC10	255.124	5584985	256.131	256.131	0.4395	256	C13H20O5	4	13	20	0	5	0	0	0.385	1.538	0	0	-0.1	-0.77	4.06135
KC15	257.067	4314577	258.074	258.074	0.2461	258	C11H14O7	5	11	14	0	7	0	0	0.636	1.273	0	0	-0.5	0	14.5188
KC3	257.067	4598456	258.074	258.074	0.4011	258	C11H14O7	5	11	14	0	7	0	0	0.636	1.273	0	0	-0.5	0	14.6295
KC16	257.067	4038334	258.074	258.074	0.4398	258	C11H14O7	5	11	14	0	7	0	0	0.636	1.273	0	0	-0.5	0	12.8566
KC10	257.103	5044801	258.11	258.11	0.0697	258	C12H18O6	4	12	18	0	6	0	0	0.5	1.5	0	0	-0.3	-0.5	3.66853
KC15	257.103	4223438	258.11	258.11	0.1472	258	C12H18O6	4	12	18	0	6	0	0	0.5	1.5	0	0	-0.3	-0.5	14.2122
KC15	257.118	4156877	258.126	258.126	0.4721	258	C16H18O3	8	16	18	0	3	0	0	0.188	1.125	0	0	0.4	-0.75	13.9882
KC9	258.069	1812344	259.076	259.076	-0.1135	259	C14H14NO2P	9	14	14	1	2	1	0	0.143	1	0.0714	0	0.5	-0.86	12.8677
KC6	259.053	3598751	260.06	260.06	0.1731	260	C14H13O3P	9	14	13	0	3	1	0	0.214	0.929	0	0	0.5	-0.86	5.04033
KC15	259.082	3918981	260.09	260.09	0.3208	260	C11H16O7	4	11	16	0	7	0	0	0.636	1.455	0	0	-0.8	-0.18	13.1876
KC20	259.089	1898414	260.097	260.097	-0.1172	260	C15H17O2P	8	15	17	0	2	1	0	0.133	1.133	0	0	0.4	-1.2	9.27898
KC3	259.098	4399789	260.105	260.105	0.3741	260	C15H16O4	8	15	16	0	4	0	0	0.267	1.067	0	0	0.4	-0.53	13.9975
KC3	259.119	4230827	260.126	260.126	0.1843	260	C12H20O6	3	12	20	0	6	0	0	0.5	1.667	0	0	-0.5	-0.67	13.46
KC3	259.134	4205225	260.141	260.141	0.3529	260	C16H20O3	7	16	20	0	3	0	0	0.188	1.25	0	0	0.3	-0.88	13.3785
KC3	261.041	4022636	262.048	262.048	0.2986	262	C13H10O6	9	13	10	0	6	0	0	0.462	0.769	0	0	0.4	0.15	12.7976
KC9	261.064	1608354	262.072	262.072	0.13	262	C12H6N8	14	12	6	8	0	0	0	0	0.5	0.6667	0	1.5	1.5	11.4193
KC20	261.069	1623040	262.076	262.076	0.0571	262	C14H15O3P	8	14	15	0	3	1	0	0.214	1.071	0	0	0.4	-1	7.93302
KC15	261.077	4584982	262.084	262.084	0.2394	262	C14H14O5	8	14	14	0	5	0	0	0.357	1	0	0	0.3	-0.29	15.4288
KC3	261.077	3986787	262.084	262.084	0.3921	262	C14H14O5	8	14	14	0	5	0	0	0.357	1	0	0	0.3	-0.29	12.6836
KC15	261.113	4224520	262.121	262.121	0.1802	262	C15H18O4	7	15	18	0	4	0	0	0.267	1.2	0	0	0.3	-0.67	14.2158
KC3	261.113	5011803	262.121	262.121	0.3328	262	C15H18O4	7	15	18	0	4	0	0	0.267	1.2	0	0	0.3	-0.67	15.9446
KC3	263.056	5541630	264.063	264.063	0.2961	264	C13H12O6	8	13	12	0	6	0	0	0.462	0.923	0	0	0.3	0	17.6301
KC10	263.093	3861152	264.1	264.1	0.1238	264	C14H16O5	7	14	16	0	5	0	0	0.357	1.143	0	0	0.2	-0.43	2.80779
KC15	263.093	6065813	264.1	264.1	0.1995	264	C14H16O5	7	14	16	0	5	0	0	0.357	1.143	0	0	0.2	-0.43	20.4119
KC3	263.093	6930160	264.1	264.1	0.351	264	C14H16O5	7	14	16	0	5	0	0	0.357	1.143	0	0	0.2	-0.43	22.0476
KC9	263.1	1517362	264.107	264.107	0.1846	264	C18H17P	11	18	17	0	0	1	0	0	0.944	0	0	0.6	-1.22	10.7733
KC10	263.129	4030096	264.136	264.136	0.1786	264	C15H20O4	6	15	20	0	4	0	0	0.267	1.333	0	0	0.2	-0.8	2.93065
KC15	263.129	4402818	264.136	264.136	0.2922	264	C15H20O4	6	15	20	0	4	0	0	0.267	1.333	0	0	0.2	-0.8	14.8158
KC3	263.129	5504738	264.136	264.136	0.4436	264	C15H20O4	6	15	20	0	4	0	0	0.267	1.333	0	0	0.2	-0.8	17.5128
KC20	265.042	1508389	266.05	266.05	0.2244	266	C16H11O2P	12	16	11	0	2	1	0	0.125	0.688	0	0	0.7	-0.75	7.37263
KC9	265.064	1518231	266.071	266.071	-0.0363	266	C13H15O4P	7	13	15	0	4	1	0	0.308	1.154	0	0	0.2	-0.92	10.7795
KC20	265.068	1787688	266.076	266.075	0.4713	266	C10H21O2P3	2	10	21	0	2	3	0	0.2	2.1	0	0	-0.6	-3.2	8.73778
KC16	265.072	3766821	266.079	266.079	0.2561	266	C13H14O6	7	13	14	0	6	0	0	0.462	1.077	0	0	0.1	-0.15	11.9922
KC10	265.072	4223689	266.079	266.079	0.2936	266	C13H14O6	7	13	14	0	6	0	0	0.462	1.077	0	0	0.1	-0.15	3.07143
KC15	265.072	5620282	266.079	266.079	0.3312	266	C13H14O6	7	13	14	0	6	0	0	0.462	1.077	0	0	0.1	-0.15	18.9126
KC3	265.072	6384518	266.079	266.079	0.444	266	C13H14O6	7	13	14	0	6	0	0	0.462	1.077	0	0	0.1	-0.15	20.3117
KC15	265.108	5616164	266.115	266.115	0.1602	266	C14H18O5	6	14	18	0	5	0	0	0.357	1.286	0	0	0.1	-0.57	18.8988
KC9	265.108	1771929	266.115	266.115	0.1602	266	C14H18O5	6	14	18	0	5	0	0	0.357	1.286	0	0	0.1	-0.57	12.5807
KC20	265.108	1572141	266.115	266.115	0.2729	266	C14H18O5	6	14	18	0	5	0	0	0.357	1.286	0	0	0.1	-0.57	7.68424
KC10	265.108	5509813	266.116	266.115	0.4232	266	C14H18O5	6	14	18	0	5	0	0	0.357	1.286	0	0	0.1	-0.57	4.00668
KC3	265.108	8711027	266.116	266.115	0.4232	266	C14H18O5	6	14	18	0	5	0	0	0.357	1.286	0	0	0.1	-0.57	27.7133
KC20	265.129	1552688	266.136	266.137	-0.4387	266	C11H22O7	1	11	22	0	7	0	0	0.636	2	0	0	-1.5	-0.73	7.58915
KC20	265.136	1545009	266.144	266.144	-0.0026	266	C15H23O2P	5	15	23	0	2	1	0	0.133	1.533	0	0	0.2	-1.6	7.55162
KC20	267.072	1666309	268.079	268.079	-0.2454	268	C9H16O9	2	9	16	0	9	0	0	1	1.778	0	0	-999	0.22	8.1445
KC9	267.072	1509853	268.08	268.079	0.3887	268	C9H16O9	2	9	16	0	9	0	0	1	1.778	0	0	-999	0.22	10.72
KC16	267.087	4013073	268.095	268.095	0.2166	268	C13H16O6	6	13	16	0	6	0	0	0.462	1.231	0	0	0	-0.31	12.7762
KC15	267.088	6814970	268.095	268.095	0.3658	268	C13H16O6	6	13	16	0	6	0	0	0.462	1.231	0	0	0	-0.31	22.9328
KC3	267.088	6797090	268.095	268.095	0.3658	268	C13H16O6	6	13	16	0	6	0	0	0.462	1.231	0	0	0	-0.31	21.6243
KC10	267.088	6284742	268.095	268.095	0.4031	268	C13H16O6	6	13	16	0	6	0	0	0.462	1.231	0	0	0	-0.31	4.5702
KC20	267.118	2031882	268.125	268.125	0.3199	268	C21H16	14	21	16	0	0	0	0	0	0.762	0	0	0.7	-0.76	9.93133
KC15	267.124	5420256	268.131	268.131	0.0468	268	C14H20O5	5	14	20	0	5	0	0	0.357	1.429	0	0	0	-0.71	18.2395
KC3	267.124	6825740	268.131	268.131	0.4198	268	C14H20O5	5	14	20	0	5	0	0	0.357	1.429	0	0	0	-0.71	21.7154
KC10	267.124	5488044	268.131	268.131	0.4944	268	C14H20O5	5	14	20	0	5	0	0	0.357	1.429	0	0	0	-0.71	3.99085
KC9	269.003	1669126	270.011	270.011	0.3023	270	C21H2O	21	21	2	0	1	0	0	0.048	0.095	0	0	1	0	11.8508
KC6	269.037	3469508	270.045	270.045	0.0559	270	C15H11O3P	11	15	11	0	3	1	0	0.2	0.733	0	0	0.6	-0.67	4.85932
KC20	269.063	1505985	270.07	270.07	-0.1962	270	C10H15N4OPS	6	10	15	4	1	1	1	0.1	1.5	0.4	0.1	-0.3	-0.4	7.36088
KC10	269.067	4160487	270.074	270.074	-0.024	270	C12H14O7	6	12	14	0	7	0	0	0.583	1.167	0	0	-0.2	0	3.02547
KC3	269.067	6185482	270.074	270.074	0.3092	270	C12H14O7	6	12	14	0	7	0	0	0.583	1.167	0	0	-0.2	0	19.6785
KC15	269.067	5904161	270.074	270.074	0.3833	270	C12H14O7	6	12	14	0	7	0	0	0.583	1.167	0	0	-0.2	0	19.8679
KC9	269.087	1533703	270.094	270.094	0.4903	270	C13H20O2P2	5	13	20	0	2	2	0	0.154	1.538	0	0	0.1	-2	10.8893
KC20	269.097	1507524	270.104	270.104	-0.1435	270	C20H14O	14	20	14	0	1	0	0	0.05	0.7	0	0	0.7	-0.6	7.3684
KC16	269.103	4087067	270.11	270.11	0.2518	270	C13H18O6	5	13	18	0	6	0	0	0.462	1.385	0	0	-0.1	-0.46	13.0118
KC15	269.103	5961476	270.11	270.11	0.3258	270	C13H18O6	5	13	18	0	6	0	0	0.462	1.385	0	0	-0.1	-0.46	20.0608
KC10	269.103	8126409	270.11	270.11	0.3258	270	C13H18O6	5	13	18	0	6	0	0	0.462	1.385	0	0	-0.1	-0.46	5.90945
KC3	269.103	8786416	270.11	270.11	0.4369	270	C13H18O6	5	13	18	0	6	0	0	0.462	1.385	0	0	-0.1	-0.46	27.9531
KC20	269.108	1673413	270.115	270.115	0.1594	270	C10H24O4P2	0	10	24	0	4	2	0	0.4	2.4	0	0	-1.5	-2.6	8.17923
KC15	269.139	4423399	270.147	270.147	-0.1018	270	C14H22O5	4	14	22	0	5	0	0	0.357	1.571	0	0	-0.1	-0.86	14.885
KC3	269.14	5301719	270.147	270.147	0.2313	270	C14H22O5	4	14	22	0	5	0	0	0.357	1.571	0	0	-0.1	-0.86	16.8669
KC10	269.14	4951979	270.147	270.147	0.4904	270	C14H22O5	4	14	22	0	5	0	0	0.357	1.571	0	0	-0.1	-0.86	3.60103
KC14	269.14	5542748	270.147	270.147	0.4904	270	C14H22O5	4	14	22	0	5	0	0	0.357	1.571	0	0	-0.1	-0.86	12.4521
KC9	270.988	1627162	271.996	271.996	-0.4639	272	C13H4O7	12	13	4	0	7	0	0	0.538	0.308	0	0	0.8	0.77	11.5529
KC2	271.017	3668215	272.024	272.024	0.2225	272	C14H9O4P	11	14	9	0	4	1	0	0.286	0.643	0	0	0.7	-0.43	10.2839
KC20	271.059	1509475	272.066	272.066	0.3742	272	C8H17O8P	1	8	17	0	8	1	0	1	2.125	0	0	8	-0.75	7.37794
KC10	271.082	5234970	272.09	272.09	0.3067	272	C12H16O7	5	12	16	0	7	0	0	0.583	1.333	0	0	-0.4	-0.17	3.80682
KC15	271.082	4204694	272.09	272.09	0.3434	272	C12H16O7	5	12	16	0	7	0	0	0.583	1.333	0	0	-0.4	-0.17	14.1491
KC3	271.082	6269996	272.09	272.09	0.4169	272	C12H16O7	5	12	16	0	7	0	0	0.583	1.333	0	0	-0.4	-0.17	19.9474
KC15	271.098	3874952	272.105	272.105	0.0636	272	C16H16O4	9	16	16	0	4	0	0	0.25	1	0	0	0.4	-0.5	13.0395
KC20	271.11	1636199	272.118	272.118	-0.073	272	C13H21O4P	4	13	21	0	4	1	0	0.308	1.615	0	0	-0.1	-1.38	7.99733
KC15	271.119	4137078	272.126	272.126	0.2864	272	C13H20O6	4	13	20	0	6	0	0	0.462	1.538	0	0	-0.3	-0.62	13.9215
KC10	271.119	5613817	272.126	272.126	0.3966	272	C13H20O6	4	13	20	0	6	0	0	0.462	1.538	0	0	-0.3	-0.62	4.08231
KC3	271.119	6589455	272.126	272.126	0.4334	272	C13H20O6	4	13	20	0	6	0	0	0.462	1.538	0	0	-0.3	-0.62	20.9637
KC3	272.907	4216413	273.914	273.914	0.2242	274	C11HO3P3	13	11	1	0	3	3	0	0.273	0.091	0	0	1.4	-0.91	13.4141
KC9	272.989	1714717	273.996	273.996	-0.1098	274	C9H6O10	7	9	6	0	10	0	0	1.111	0.667	0	0	3	1.56	12.1745
KC20	273.017	1584107	274.024	274.024	0.2796	274	C10H11O7P	6	10	11	0	7	1	0	0.7	1.1	0	0	-1	-0.2	7.74272
KC6	273.032	3580017	274.039	274.039	0.0017	274	C14H11O4P	10	14	11	0	4	1	0	0.286	0.786	0	0	0.6	-0.57	5.0141
KC2	273.032	4157470	274.04	274.039	0.2571	274	C14H11O4P	10	14	11	0	4	1	0	0.286	0.786	0	0	0.6	-0.57	11.6555
KC9	273.066	1810461	274.073	274.074	-0.2775	274	C8H20O6P2	0	8	20	0	6	2	0	0.75	2.5	0	0	-999	-2.25	12.8543
KC9	273.093	1659165	274.1	274.1	0.1985	274	C11H20N2O2P2	4	11	20	2	2	2	0	0.182	1.818	0.1818	0	-0.4	-1.82	11.7801
KC10	273.098	4389280	274.105	274.105	0.1948	274	C12H18O7	4	12	18	0	7	0	0	0.583	1.5	0	0	-0.6	-0.33	3.19184
KC3	273.098	4820411	274.105	274.105	0.3042	274	C12H18O7	4	12	18	0	7	0	0	0.583	1.5	0	0	-0.6	-0.33	15.3357
KC3	273.113	4484526	274.121	274.121	0.1723	274	C16H18O4	8	16	18	0	4	0	0	0.25	1.125	0	0	0.3	-0.62	14.2671
KC20	273.141	1699571	274.149	274.149	-0.1315	274	C17H23OP	7	17	23	0	1	1	0	0.059	1.353	0	0	0.3	-1.53	8.30708
KC3	273.15	3787151	274.157	274.157	0.1887	274	C17H22O3	7	17	22	0	3	0	0	0.176	1.294	0	0	0.3	-0.94	12.0484
KC20	274.952	1541216	275.959	275.959	-0.3632	276	C8H6O7P2	7	8	6	0	7	2	0	0.875	0.75	0	0	2	-0.25	7.53308
KC20	274.995	1617507	276.002	276.002	0.1461	276	C13H11OP3	10	13	11	0	1	3	0	0.077	0.846	0	0	0.7	-1.85	7.90597
KC9	275.018	1544213	276.026	276.026	-0.0291	276	C17H10P2	14	17	10	0	0	2	0	0	0.588	0	0	0.8	-1.18	10.9639
KC2	275.048	3958493	276.055	276.055	0.3275	276	C14H13O4P	9	14	13	0	4	1	0	0.286	0.929	0	0	0.4	-0.71	11.0977
KC3	275.056	4462346	276.063	276.063	0.3557	276	C14H12O6	9	14	12	0	6	0	0	0.429	0.857	0	0	0.4	0	14.1965
KC2	275.069	3692228	276.076	276.076	-0.3947	276	C11H17O6P	4	11	17	0	6	1	0	0.545	1.545	0	0	-0.8	-0.91	10.3512
KC6	275.069	5004177	276.076	276.076	-0.3947	276	C11H17O6P	4	11	17	0	6	1	0	0.545	1.545	0	0	-0.8	-0.91	7.00874
KC10	275.077	3925442	276.085	276.085	0.3942	276	C11H16O8	4	11	16	0	8	0	0	0.727	1.455	0	0	-1.3	0	2.85454
KC3	275.093	5082858	276.1	276.1	0.3719	276	C15H16O5	8	15	16	0	5	0	0	0.333	1.067	0	0	0.3	-0.4	16.1706
KC15	275.129	4657693	276.136	276.136	-0.0464	276	C16H20O4	7	16	20	0	4	0	0	0.25	1.25	0	0	0.2	-0.75	15.6734
KC20	275.17	1890413	276.177	276.177	-0.1567	276	C14H30OP2	1	14	30	0	1	2	0	0.071	2.143	0	0	-0.2	-2.71	9.23987
KC15	277.055	3799760	278.062	278.063	-0.3145	278	C14H16O2P2	8	14	16	0	2	2	0	0.143	1.143	0	0	0.4	-1.57	12.7864
KC20	277.066	1818833	278.073	278.073	-0.067	278	C21H10O	17	21	10	0	1	0	0	0.048	0.476	0	0	0.8	-0.38	8.89
KC15	277.072	4396735	278.079	278.079	0.3169	278	C14H14O6	8	14	14	0	6	0	0	0.429	1	0	0	0.2	-0.14	14.7953
KC10	277.072	4692339	278.079	278.079	0.3529	278	C14H14O6	8	14	14	0	6	0	0	0.429	1	0	0	0.2	-0.14	3.41222
KC3	277.072	6567890	278.079	278.079	0.4248	278	C14H14O6	8	14	14	0	6	0	0	0.429	1	0	0	0.2	-0.14	20.8951
KC2	277.085	4795741	278.092	278.092	-0.2842	278	C11H19O6P	3	11	19	0	6	1	0	0.545	1.727	0	0	-1	-1.09	13.4449
KC10	277.108	4788555	278.115	278.115	0.2252	278	C15H18O5	7	15	18	0	5	0	0	0.333	1.2	0	0	0.2	-0.53	3.48219
KC3	277.108	7350192	278.116	278.115	0.333	278	C15H18O5	7	15	18	0	5	0	0	0.333	1.2	0	0	0.2	-0.53	23.3839
KC15	277.108	6228636	278.116	278.115	0.369	278	C15H18O5	7	15	18	0	5	0	0	0.333	1.2	0	0	0.2	-0.53	20.9598
KC9	277.115	1545478	278.122	278.122	-0.0047	278	C19H19P	11	19	19	0	0	1	0	0	1	0	0	0.6	-1.26	10.9729
KC15	277.145	5046904	278.152	278.152	0.1334	278	C16H22O4	6	16	22	0	4	0	0	0.25	1.375	0	0	0.2	-0.88	16.9832
KC20	277.173	1699543	278.18	278.18	-0.0222	278	C17H27OP	5	17	27	0	1	1	0	0.059	1.588	0	0	0.2	-1.76	8.30694
KC20	277.209	1595097	278.216	278.216	0.4252	278	C18H31P	4	18	31	0	0	1	0	0	1.722	0	0	0.2	-2	7.79644
KC3	279.051	4149379	280.058	280.058	0.3698	280	C13H12O7	8	13	12	0	7	0	0	0.538	0.923	0	0	0.2	0.15	13.2008
KC15	279.087	7004921	280.095	280.095	0.243	280	C14H16O6	7	14	16	0	6	0	0	0.429	1.143	0	0	0.1	-0.29	23.572
KC10	279.087	4690127	280.095	280.095	0.3144	280	C14H16O6	7	14	16	0	6	0	0	0.429	1.143	0	0	0.1	-0.29	3.41061
KC3	279.087	8900704	280.095	280.095	0.3144	280	C14H16O6	7	14	16	0	6	0	0	0.429	1.143	0	0	0.1	-0.29	28.3167
KC20	279.095	1615156	280.102	280.102	0.3361	280	C18H17OP	11	18	17	0	1	1	0	0.056	0.944	0	0	0.6	-1.11	7.89448
KC10	279.124	6342823	280.131	280.131	0.0805	280	C15H20O5	6	15	20	0	5	0	0	0.333	1.333	0	0	0.1	-0.67	4.61244
KC15	279.124	6501077	280.131	280.131	0.3304	280	C15H20O5	6	15	20	0	5	0	0	0.333	1.333	0	0	0.1	-0.67	21.8766
KC3	279.124	7774270	280.131	280.131	0.4375	280	C15H20O5	6	15	20	0	5	0	0	0.333	1.333	0	0	0.1	-0.67	24.7331
KC14	279.144	3783521	280.151	280.151	-0.3517	280	C16H26P2	5	16	26	0	0	2	0	0	1.625	0	0	0.2	-2.25	8.49987
KC9	279.269	1767415	280.277	280.277	0.0019	280	C19H36O	2	19	36	0	1	0	0	0.053	1.895	0	0	0.1	-1.79	12.5487
KC20	280.957	1641865	281.965	281.965	-0.4254	282	C10H2O10	10	10	2	0	10	0	0	1	0.2	0	0	-999	1.8	8.02503
KC20	280.969	2067210	281.976	281.976	-0.1732	282	C11H9O3P3	9	11	9	0	3	3	0	0.273	0.818	0	0	0.6	-1.64	10.104
KC15	281.067	4059984	282.074	282.074	0.4379	282	C13H14O7	7	13	14	0	7	0	0	0.538	1.077	0	0	0	0	13.6621
KC10	281.067	5300282	282.074	282.074	0.4379	282	C13H14O7	7	13	14	0	7	0	0	0.538	1.077	0	0	0	0	3.85431
KC3	281.067	4425976	282.074	282.074	0.4733	282	C13H14O7	7	13	14	0	7	0	0	0.538	1.077	0	0	0	0	14.0808
KC20	281.071	1633166	282.079	282.079	-0.3242	282	C10H20O5P2	2	10	20	0	5	2	0	0.5	2	0	0	-1.7	-2	7.98251
KC20	281.088	1516687	282.095	282.095	0.4755	282	C10H18O9	2	10	18	0	9	0	0	0.9	1.8	0	0	-7	0	7.41319
KC10	281.103	8009745	282.11	282.11	0.2765	282	C14H18O6	6	14	18	0	6	0	0	0.429	1.286	0	0	0	-0.43	5.82461
KC15	281.103	7973677	282.11	282.11	0.3119	282	C14H18O6	6	14	18	0	6	0	0	0.429	1.286	0	0	0	-0.43	26.832
KC3	281.103	9447636	282.11	282.11	0.3828	282	C14H18O6	6	14	18	0	6	0	0	0.429	1.286	0	0	0	-0.43	30.0567
KC20	281.139	1964433	282.147	282.147	0.1506	282	C15H22O5	5	15	22	0	5	0	0	0.333	1.467	0	0	0	-0.8	9.60166
KC15	281.14	7056137	282.147	282.147	0.3278	282	C15H22O5	5	15	22	0	5	0	0	0.333	1.467	0	0	0	-0.8	23.7444
KC10	281.14	6451177	282.147	282.147	0.3278	282	C15H22O5	5	15	22	0	5	0	0	0.333	1.467	0	0	0	-0.8	4.69123
KC3	281.14	7335090	282.147	282.147	0.3987	282	C15H22O5	5	15	22	0	5	0	0	0.333	1.467	0	0	0	-0.8	23.3359
KC9	281.159	1602031	282.167	282.167	0.2885	282	C16H28P2	4	16	28	0	0	2	0	0	1.75	0	0	0.1	-2.38	11.3745
KC20	282.92	1606882	283.928	283.928	0.211	284	C9H2O7P2	10	9	2	0	7	2	0	0.778	0.222	0	0	-999	0.22	7.85404
KC9	282.936	1966065	283.943	283.943	-0.0924	284	C13H2O4P2	14	13	2	0	4	2	0	0.308	0.154	0	0	1.1	-0.31	13.9591
KC9	283.059	1679345	284.066	284.066	-0.1345	284	C9H17O8P	2	9	17	0	8	1	0	0.889	1.889	0	0	-999	-0.67	11.9234
KC15	283.082	5653403	284.09	284.09	0.2937	284	C13H16O7	6	13	16	0	7	0	0	0.538	1.231	0	0	-0.2	-0.15	19.0241
KC10	283.082	5834631	284.09	284.09	0.3641	284	C13H16O7	6	13	16	0	7	0	0	0.538	1.231	0	0	-0.2	-0.15	4.24289
KC3	283.082	6971759	284.09	284.09	0.3641	284	C13H16O7	6	13	16	0	7	0	0	0.538	1.231	0	0	-0.2	-0.15	22.18
KC9	283.087	1616369	284.094	284.094	-0.4277	284	C10H22O5P2	1	10	22	0	5	2	0	0.5	2.2	0	0	-2	-2.2	11.4763
KC15	283.119	6556536	284.126	284.126	0.2391	284	C14H20O6	5	14	20	0	6	0	0	0.429	1.429	0	0	-0.1	-0.57	22.0632
KC10	283.119	8333151	284.126	284.126	0.3799	284	C14H20O6	5	14	20	0	6	0	0	0.429	1.429	0	0	-0.1	-0.57	6.05979
KC3	283.119	9548108	284.126	284.126	0.4855	284	C14H20O6	5	14	20	0	6	0	0	0.429	1.429	0	0	-0.1	-0.57	30.3764
KC10	283.155	4499256	284.162	284.162	0.2197	284	C15H24O5	4	15	24	0	5	0	0	0.333	1.6	0	0	-0.1	-0.93	3.27182
KC15	283.155	4297557	284.162	284.162	0.3605	284	C15H24O5	4	15	24	0	5	0	0	0.333	1.6	0	0	-0.1	-0.93	14.4616
KC3	283.155	4632873	284.162	284.162	0.3956	284	C15H24O5	4	15	24	0	5	0	0	0.333	1.6	0	0	-0.1	-0.93	14.739
KC20	284.916	1544768	285.923	285.923	-0.3504	286	C13H4P2S2	13	13	4	0	0	2	2	0	0.308	0	0.1538	1	-0.77	7.55044
KC20	284.944	1545537	285.952	285.951	0.1316	286	C9H3O9P	9	9	3	0	9	1	0	1	0.333	0	0	1	1.11	7.5542
KC20	284.981	1600067	285.988	285.988	0.0424	286	C10H7O8P	8	10	7	0	8	1	0	0.8	0.7	0	0	-1	0.4	7.82073
KC20	284.989	1518659	285.996	285.996	0.3843	286	C10H6O10	8	10	6	0	10	0	0	1	0.6	0	0	-999	1.4	7.42283
KC9	285.03	1655811	286.037	286.037	-0.0019	286	C8H16O7P2	2	8	16	0	7	2	0	0.875	2	0	0	7	-1.5	11.7563
KC6	285.032	4323636	286.039	286.039	-0.1032	286	C15H11O4P	11	15	11	0	4	1	0	0.267	0.733	0	0	0.6	-0.53	6.05559
KC20	285.047	1704006	286.055	286.055	-0.1946	286	C19H11OP	15	19	11	0	1	1	0	0.053	0.579	0	0	0.8	-0.74	8.32876
KC10	285.062	4220716	286.069	286.069	0.2408	286	C12H14O8	6	12	14	0	8	0	0	0.667	1.167	0	0	-0.5	0.17	3.06926
KC10	285.098	6825734	286.105	286.105	0.2215	286	C13H18O7	5	13	18	0	7	0	0	0.538	1.385	0	0	-0.3	-0.31	4.96361
KC15	285.098	5831706	286.105	286.105	0.3613	286	C13H18O7	5	13	18	0	7	0	0	0.538	1.385	0	0	-0.3	-0.31	19.6241
KC3	285.098	6162950	286.105	286.105	0.3963	286	C13H18O7	5	13	18	0	7	0	0	0.538	1.385	0	0	-0.3	-0.31	19.6068
KC10	285.134	10567391	286.142	286.142	0.3071	286	C14H22O6	4	14	22	0	6	0	0	0.429	1.571	0	0	-0.2	-0.71	7.6845
KC9	286.931	1610793	287.938	287.938	0.4485	288	C12H2O5P2	13	12	2	0	5	2	0	0.417	0.167	0	0	1.2	-0.17	11.4367
KC20	286.95	6405799	287.958	287.958	0.3939	288	C9H4O9S	8	9	4	0	9	0	1	1	0.444	0	0.1111	2	1.78	31.31
KC20	287.035	1535275	288.042	288.042	0.0957	288	C18H8O4	15	18	8	0	4	0	0	0.222	0.444	0	0	0.8	0	7.50404
KC9	287.04	1820204	288.047	288.047	0.1827	288	C15H14O2P2	10	15	14	0	2	2	0	0.133	0.933	0	0	0.5	-1.33	12.9235
KC6	287.048	4244657	288.055	288.055	-0.1027	288	C15H13O4P	10	15	13	0	4	1	0	0.267	0.867	0	0	0.5	-0.67	5.94498
KC20	287.048	1876652	288.055	288.055	0.0361	288	C15H13O4P	10	15	13	0	4	1	0	0.267	0.867	0	0	0.5	-0.67	9.17261
KC2	287.048	3840354	288.055	288.055	0.2444	288	C15H13O4P	10	15	13	0	4	1	0	0.267	0.867	0	0	0.5	-0.67	10.7665
KC3	287.056	3984144	288.063	288.063	-0.1104	288	C15H12O6	10	15	12	0	6	0	0	0.4	0.8	0	0	0.4	0	12.6752
KC10	287.077	4663039	288.085	288.085	0.4125	288	C12H16O8	5	12	16	0	8	0	0	0.667	1.333	0	0	-0.8	0	3.39092
KC3	287.077	4180733	288.085	288.085	0.4819	288	C12H16O8	5	12	16	0	8	0	0	0.667	1.333	0	0	-0.8	0	13.3006
KC2	287.105	4093241	288.113	288.113	-0.2238	288	C13H21O5P	4	13	21	0	5	1	0	0.385	1.615	0	0	-0.3	-1.23	11.4755
KC20	287.112	1625264	288.12	288.12	0.2138	288	C17H22P2	8	17	22	0	0	2	0	0	1.294	0	0	0.4	-1.88	7.94389
KC10	287.114	3851994	288.121	288.121	-0.0232	288	C13H20O7	4	13	20	0	7	0	0	0.538	1.538	0	0	-0.5	-0.46	2.80113
KC3	287.129	4459216	288.136	288.136	0.1984	288	C17H20O4	8	17	20	0	4	0	0	0.235	1.176	0	0	0.3	-0.71	14.1866
KC20	287.165	1907378	288.172	288.173	-0.2718	288	C18H24O3	7	18	24	0	3	0	0	0.167	1.333	0	0	0.3	-1	9.32279
KC20	287.178	1623731	288.185	288.185	-0.1926	288	C15H29O3P	2	15	29	0	3	1	0	0.2	1.933	0	0	-0.2	-1.87	7.93639
KC20	287.238	1636022	288.245	288.245	-0.3794	288	C20H32O	5	20	32	0	1	0	0	0.05	1.6	0	0	0.2	-1.5	7.99647
KC20	288.946	1709336	289.954	289.953	0.4107	290	C12H4O5P2	12	12	4	0	5	2	0	0.417	0.333	0	0	1	-0.33	8.35481
KC9	288.954	1614957	289.962	289.962	-0.1488	290	C12H3O7P	12	12	3	0	7	1	0	0.583	0.25	0	0	1	0.5	11.4662
KC20	288.995	1695771	290.003	290.003	-0.3227	290	C10H13O4P3	6	10	13	0	4	3	0	0.4	1.3	0	0	-0.3	-2	8.28851
KC20	289.011	1547036	290.018	290.018	-0.1025	290	C14H13OP3	10	14	13	0	1	3	0	0.071	0.929	0	0	0.6	-1.86	7.56153
KC2	289.027	4628593	290.034	290.034	0.227	290	C14H11O5P	10	14	11	0	5	1	0	0.357	0.786	0	0	0.5	-0.43	12.9763
KC9	289.048	1685105	290.056	290.056	0.1602	290	C11H15O7P	5	11	15	0	7	1	0	0.636	1.364	0	0	-1	-0.55	11.9643
KC15	289.057	4025959	290.064	290.064	0.2561	290	C11H14O9	5	11	14	0	9	0	0	0.818	1.273	0	0	-2	0.36	13.5476
KC15	289.072	4517466	290.079	290.079	0.3038	290	C15H14O6	9	15	14	0	6	0	0	0.4	0.933	0	0	0.3	-0.13	15.2016
KC6	289.085	5535957	290.092	290.092	-0.4448	290	C12H19O6P	4	12	19	0	6	1	0	0.5	1.583	0	0	-0.6	-1	7.75354
KC2	289.085	4288594	290.092	290.092	-0.2035	290	C12H19O6P	4	12	19	0	6	1	0	0.5	1.583	0	0	-0.6	-1	12.0231
KC20	289.108	1569570	290.115	290.115	0.2159	290	C16H18O5	8	16	18	0	5	0	0	0.312	1.125	0	0	0.3	-0.5	7.67167
KC15	289.108	4146748	290.116	290.115	0.3193	290	C16H18O5	8	16	18	0	5	0	0	0.312	1.125	0	0	0.3	-0.5	13.9541
KC3	289.108	5030946	290.116	290.115	0.3882	290	C16H18O5	8	16	18	0	5	0	0	0.312	1.125	0	0	0.3	-0.5	16.0055
KC2	289.121	4063294	290.128	290.128	-0.2569	290	C13H23O5P	3	13	23	0	5	1	0	0.385	1.769	0	0	-0.4	-1.38	11.3915
KC9	289.145	1531765	290.152	290.152	-0.0444	290	C17H22O4	7	17	22	0	4	0	0	0.235	1.294	0	0	0.2	-0.82	10.8756
KC20	289.238	1671466	290.246	290.246	-0.0802	290	C16H34O4	0	16	34	0	4	0	0	0.25	2.125	0	0	-0.3	-1.62	8.16971
KC20	290.043	1763165	291.051	291.05	0.3225	291	C13H5N7O2	15	13	5	7	2	0	0	0.154	0.385	0.5385	0	1.5	1.54	8.61791
KC6	290.111	7260980	291.118	291.118	0.438	291	C11H24N3P3	3	11	24	3	0	3	0	0	2.182	0.2727	0	-0.6	-2.73	10.1696
KC9	290.217	1517223	291.224	291.224	-0.0269	291	C15H35NP2	0	15	35	1	0	2	0	0	2.333	0.0667	0	-0.2	-2.8	10.7723
KC20	290.893	1764246	291.9	291.901	-0.2078	292	C8H6O2P2S3	7	8	6	0	2	2	3	0.25	0.75	0	0.375	0	-0.75	8.6232
KC20	290.947	1599898	291.955	291.955	0.3623	292	C9H10O3P2S2	6	9	10	0	3	2	2	0.333	1.111	0	0.2222	-0.5	-1.11	7.8199
KC20	291.04	1526177	292.048	292.048	-0.4973	292	C7H18O8P2	0	7	18	0	8	2	0	1.143	2.571	0	0	3.3	-1.71	7.45957
KC15	291.051	4182078	292.058	292.058	0.3204	292	C14H12O7	9	14	12	0	7	0	0	0.5	0.857	0	0	0.3	0.14	14.073
KC6	291.064	4900249	292.071	292.071	-0.4231	292	C11H17O7P	4	11	17	0	7	1	0	0.636	1.545	0	0	-1.3	-0.73	6.86318
KC2	291.064	4654333	292.071	292.071	-0.2177	292	C11H17O7P	4	11	17	0	7	1	0	0.636	1.545	0	0	-1.3	-0.73	13.0485
KC15	291.088	4558883	292.095	292.095	0.37	292	C15H16O6	8	15	16	0	6	0	0	0.4	1.067	0	0	0.2	-0.27	15.3409
KC10	291.088	4071501	292.095	292.095	0.4042	292	C15H16O6	8	15	16	0	6	0	0	0.4	1.067	0	0	0.2	-0.27	2.96076
KC3	291.088	6260203	292.095	292.095	0.4727	292	C15H16O6	8	15	16	0	6	0	0	0.4	1.067	0	0	0.2	-0.27	19.9162
KC2	291.1	4515057	292.108	292.108	-0.1338	292	C12H21O6P	3	12	21	0	6	1	0	0.5	1.75	0	0	-0.8	-1.17	12.658
KC9	291.118	1534682	292.125	292.125	0.2594	292	C23H16	16	23	16	0	0	0	0	0	0.696	0	0	0.7	-0.7	10.8963
KC20	291.124	1706919	292.131	292.131	-0.2309	292	C16H20O5	7	16	20	0	5	0	0	0.312	1.25	0	0	0.2	-0.62	8.343
KC16	291.124	4325284	292.131	292.131	0.1799	292	C16H20O5	7	16	20	0	5	0	0	0.312	1.25	0	0	0.2	-0.62	13.7702
KC15	291.124	6494215	292.131	292.131	0.2141	292	C16H20O5	7	16	20	0	5	0	0	0.312	1.25	0	0	0.2	-0.62	21.8535
KC10	291.124	4968494	292.131	292.131	0.2141	292	C16H20O5	7	16	20	0	5	0	0	0.312	1.25	0	0	0.2	-0.62	3.61304
KC3	291.124	5850576	292.131	292.131	0.3511	292	C16H20O5	7	16	20	0	5	0	0	0.312	1.25	0	0	0.2	-0.62	18.613
KC15	291.16	3999724	292.167	292.167	-0.2155	292	C17H24O4	6	17	24	0	4	0	0	0.235	1.412	0	0	0.2	-0.94	13.4593
KC20	291.197	1681324	292.204	292.204	0.0737	292	C18H28O3	5	18	28	0	3	0	0	0.167	1.556	0	0	0.1	-1.22	8.21789
KC20	292.925	1644591	293.933	293.933	-0.2896	294	C8H6O6S3	6	8	6	0	6	0	3	0.75	0.75	0	0.375	3	1.5	8.03835
KC20	292.963	1580594	293.971	293.971	-0.4841	294	C9H4N4O4P2	11	9	4	4	4	2	0	0.444	0.444	0.4444	0	-1	0.67	7.72555
KC20	292.973	1618227	293.98	293.98	0.1153	294	C15H2O7	15	15	2	0	7	0	0	0.467	0.133	0	0	1	0.8	7.90949
KC20	293.058	1673530	294.066	294.066	0.0535	294	C14H15O5P	8	14	15	0	5	1	0	0.357	1.071	0	0	0.2	-0.71	8.1798
KC13	293.065	3688383	294.073	294.073	-0.0619	294	C18H16P2	12	18	16	0	0	2	0	0	0.889	0	0	0.6	-1.44	16.5866
KC15	293.067	4156076	294.074	294.074	0.42	294	C14H14O7	8	14	14	0	7	0	0	0.5	1	0	0	0.1	0	13.9855
KC2	293.079	4647794	294.087	294.087	-0.4545	294	C11H19O7P	3	11	19	0	7	1	0	0.636	1.727	0	0	-1.7	-0.91	13.0301
KC20	293.095	1534525	294.102	294.102	-0.1693	294	C15H19O4P	7	15	19	0	4	1	0	0.267	1.267	0	0	0.2	-1.07	7.50038
KC9	293.1	1535334	294.107	294.107	0.3239	294	C12H25O2P3	2	12	25	0	2	3	0	0.167	2.083	0	0	-0.4	-3	10.9009
KC15	293.103	9138836	294.11	294.11	0.3332	294	C15H18O6	7	15	18	0	6	0	0	0.4	1.2	0	0	0.1	-0.4	30.7528
KC3	293.103	8445997	294.11	294.11	0.4012	294	C15H18O6	7	15	18	0	6	0	0	0.4	1.2	0	0	0.1	-0.4	26.8701
KC10	293.103	6377981	294.11	294.11	0.4692	294	C15H18O6	7	15	18	0	6	0	0	0.4	1.2	0	0	0.1	-0.4	4.63801
KC15	293.14	5939836	294.147	294.147	0.3144	294	C16H22O5	6	16	22	0	5	0	0	0.312	1.375	0	0	0.1	-0.75	19.9879
KC10	293.14	5775842	294.147	294.147	0.4504	294	C16H22O5	6	16	22	0	5	0	0	0.312	1.375	0	0	0.1	-0.75	4.20014
KC3	293.14	6496277	294.147	294.147	0.4844	294	C16H22O5	6	16	22	0	5	0	0	0.312	1.375	0	0	0.1	-0.75	20.6673
KC11	293.176	15094933	294.183	294.183	-0.2822	294	C17H26O4	5	17	26	0	4	0	0	0.235	1.529	0	0	0.1	-1.06	69.2544
KC7	293.176	28037862	294.183	294.183	-0.1122	294	C17H26O4	5	17	26	0	4	0	0	0.235	1.529	0	0	0.1	-1.06	61.8152
KC15	293.176	29717092	294.183	294.183	0.3297	294	C17H26O4	5	17	26	0	4	0	0	0.235	1.529	0	0	0.1	-1.06	100
KC10	293.176	31359430	294.183	294.183	0.4316	294	C17H26O4	5	17	26	0	4	0	0	0.235	1.529	0	0	0.1	-1.06	22.8043
KC3	293.176	31432700	294.183	294.183	0.4316	294	C17H26O4	5	17	26	0	4	0	0	0.235	1.529	0	0	0.1	-1.06	100
KC10	295.082	4221080	296.09	296.09	0.2818	296	C14H16O7	7	14	16	0	7	0	0	0.5	1.143	0	0	0	-0.14	3.06953
KC3	295.082	7461672	296.09	296.09	0.3494	296	C14H16O7	7	14	16	0	7	0	0	0.5	1.143	0	0	0	-0.14	23.7386
KC2	295.095	5049305	296.102	296.102	-0.4516	296	C11H21O7P	2	11	21	0	7	1	0	0.636	1.909	0	0	-2	-1.09	14.1558
KC10	295.119	8281216	296.126	296.126	0.0606	296	C15H20O6	6	15	20	0	6	0	0	0.4	1.333	0	0	0	-0.53	6.02202
KC15	295.119	9162167	296.126	296.126	0.4658	296	C15H20O6	6	15	20	0	6	0	0	0.4	1.333	0	0	0	-0.53	30.8313
KC20	295.131	1656304	296.139	296.139	-0.4364	296	C12H25O6P	1	12	25	0	6	1	0	0.5	2.083	0	0	-1.2	-1.5	8.0956
KC15	295.155	5469603	296.162	296.162	0.177	296	C16H24O5	5	16	24	0	5	0	0	0.312	1.5	0	0	0	-0.88	18.4056
KC10	295.155	5516393	296.163	296.162	0.4471	296	C16H24O5	5	16	24	0	5	0	0	0.312	1.5	0	0	0	-0.88	4.01147
KC3	295.155	5110524	296.163	296.162	0.4471	296	C16H24O5	5	16	24	0	5	0	0	0.312	1.5	0	0	0	-0.88	16.2586
KC20	296.903	1687967	297.911	297.911	-0.44	298	C8H10S6	4	8	10	0	0	0	6	0	1.25	0	0.75	-1	0.25	8.25036
KC9	296.935	1845989	297.942	297.942	0.195	298	C14H6P4	14	14	6	0	0	4	0	0	0.429	0	0	1	-1.86	13.1066
KC6	297.032	4088151	298.039	298.039	-0.2333	298	C16H11O4P	12	16	11	0	4	1	0	0.25	0.688	0	0	0.6	-0.5	5.72578
KC9	297.056	1602803	298.063	298.063	0.0071	298	C20H10O3	16	20	10	0	3	0	0	0.15	0.5	0	0	0.8	-0.2	11.3799
KC15	297.098	8063383	298.105	298.105	0.3468	298	C14H18O7	6	14	18	0	7	0	0	0.5	1.286	0	0	-0.1	-0.29	27.1338
KC10	297.098	6997983	298.105	298.105	0.4474	298	C14H18O7	6	14	18	0	7	0	0	0.5	1.286	0	0	-0.1	-0.29	5.08887
KC3	297.098	9148068	298.105	298.105	0.4474	298	C14H18O7	6	14	18	0	7	0	0	0.5	1.286	0	0	-0.1	-0.29	29.1037
KC15	297.134	6297989	298.142	298.142	0.0935	298	C15H22O6	5	15	22	0	6	0	0	0.4	1.467	0	0	-0.1	-0.67	21.1932
KC10	297.134	10532811	298.142	298.142	0.3283	298	C15H22O6	5	15	22	0	6	0	0	0.4	1.467	0	0	-0.1	-0.67	7.65936
KC16	297.134	5799639	298.142	298.142	0.3283	298	C15H22O6	5	15	22	0	6	0	0	0.4	1.467	0	0	-0.1	-0.67	18.464
KC3	297.135	8689296	298.142	298.142	0.4624	298	C15H22O6	5	15	22	0	6	0	0	0.4	1.467	0	0	-0.1	-0.67	27.6441
KC20	297.171	1790395	298.178	298.178	0.0415	298	C16H26O5	4	16	26	0	5	0	0	0.312	1.625	0	0	-0.1	-1	8.75101
KC21	297.259	1674436	298.266	298.266	0.3527	298	C22H34	6	22	34	0	0	0	0	0	1.545	0	0	0.3	-1.55	8.18423
KC21	298.946	1684095	299.953	299.953	-0.09	300	C17H2O2P2	18	17	2	0	2	2	0	0.118	0.118	0	0	1.1	-0.47	8.23144
KC9	298.97	1597417	299.977	299.977	-0.0918	300	C13H7N2OP3	13	13	7	2	1	3	0	0.077	0.538	0.1538	0	1	-1.08	11.3417
KC21	299.03	2515593	300.037	300.037	0.1396	300	C8H9N6O5P	8	8	9	6	5	1	0	0.625	1.125	0.75	0	1	1.75	12.2956
KC6	299.048	5831100	300.055	300.055	-0.032	300	C16H13O4P	11	16	13	0	4	1	0	0.25	0.812	0	0	0.5	-0.62	8.16691
KC2	299.048	5638618	300.055	300.055	0.0013	300	C16H13O4P	11	16	13	0	4	1	0	0.25	0.812	0	0	0.5	-0.62	15.8079
KC10	299.077	4219893	300.084	300.085	-0.1705	300	C13H16O8	6	13	16	0	8	0	0	0.615	1.231	0	0	-0.4	0	3.06867
KC3	299.077	3859139	300.084	300.085	-0.0706	300	C13H16O8	6	13	16	0	8	0	0	0.615	1.231	0	0	-0.4	0	12.2775
KC15	299.077	4875792	300.085	300.085	0.2294	300	C13H16O8	6	13	16	0	8	0	0	0.615	1.231	0	0	-0.4	0	16.4074
KC21	299.092	1901200	300.1	300.1	-0.191	300	C17H16O5	10	17	16	0	5	0	0	0.294	0.941	0	0	0.4	-0.35	9.29259
KC16	299.093	4016878	300.1	300.1	0.2755	300	C17H16O5	10	17	16	0	5	0	0	0.294	0.941	0	0	0.4	-0.35	12.7883
KC21	299.098	1526417	300.106	300.106	0.2981	300	C10H20O10	1	10	20	0	10	0	0	1	2	0	0	-999	0	7.46075
KC9	299.105	1602555	300.113	300.113	0.185	300	C14H21O5P	5	14	21	0	5	1	0	0.357	1.5	0	0	-0.1	-1.14	11.3782
KC10	299.114	8643556	300.121	300.121	0.2776	300	C14H20O7	5	14	20	0	7	0	0	0.5	1.429	0	0	-0.3	-0.43	6.28551
KC15	299.114	6127105	300.121	300.121	0.4109	300	C14H20O7	5	14	20	0	7	0	0	0.5	1.429	0	0	-0.3	-0.43	20.6181
KC10	299.15	6042580	300.157	300.157	0.4591	300	C15H24O6	4	15	24	0	6	0	0	0.4	1.6	0	0	-0.2	-0.8	4.39411
KC15	299.15	3827185	300.157	300.157	0.4924	300	C15H24O6	4	15	24	0	6	0	0	0.4	1.6	0	0	-0.2	-0.8	12.8787
KC6	300.049	3495473	301.056	301.056	-0.3502	301	C11H7N7O4	12	11	7	7	4	0	0	0.364	0.636	0.6364	0	-999	2	4.89569
KC6	300.096	4107880	301.103	301.103	0.3905	301	C12H22N3P3	5	12	22	3	0	3	0	0	1.833	0.25	0	-0.2	-2.33	5.75341
KC21	300.126	1826571	301.133	301.133	-0.2703	301	C10H21N7P2	5	10	21	7	0	2	0	0	2.1	0.7	0	-4	-1	8.92783
KC4	300.917	3840088	301.924	301.924	0.0022	302	C16HOP3	18	16	1	0	1	3	0	0.062	0.062	0	0	1.2	-0.88	8.90606
KC21	300.966	1903988	301.973	301.973	-0.2716	302	C14H10P4	12	14	10	0	0	4	0	0	0.714	0	0	0.8	-2.14	9.30622
KC8	300.966	3882847	301.973	301.973	-0.2385	302	C14H10P4	12	14	10	0	0	4	0	0	0.714	0	0	0.8	-2.14	5.35611
KC6	300.966	7115376	301.973	301.973	0.2582	302	C14H10P4	12	14	10	0	0	4	0	0	0.714	0	0	0.8	-2.14	9.96564
KC2	301.027	4788027	302.034	302.034	-0.2455	302	C15H11O5P	11	15	11	0	5	1	0	0.333	0.733	0	0	0.6	-0.4	13.4233
KC6	301.027	4272825	302.034	302.034	-0.1793	302	C15H11O5P	11	15	11	0	5	1	0	0.333	0.733	0	0	0.6	-0.4	5.98443
KC21	301.051	1855871	302.058	302.058	-0.4056	302	C19H10O4	15	19	10	0	4	0	0	0.211	0.526	0	0	0.7	-0.11	9.07104
KC21	301.055	1736576	302.063	302.063	0.2071	302	C16H16O2P2	10	16	16	0	2	2	0	0.125	1	0	0	0.5	-1.38	8.48795
KC6	301.063	3965669	302.071	302.071	-0.1313	302	C16H15O4P	10	16	15	0	4	1	0	0.25	0.938	0	0	0.5	-0.75	5.55423
KC21	301.064	1803137	302.071	302.071	-0.032	302	C16H15O4P	10	16	15	0	4	1	0	0.25	0.938	0	0	0.5	-0.75	8.81329
KC2	301.064	4562776	302.071	302.071	0.1998	302	C16H15O4P	10	16	15	0	4	1	0	0.25	0.938	0	0	0.5	-0.75	12.7918
KC15	301.072	4571924	302.079	302.079	0.4573	302	C16H14O6	10	16	14	0	6	0	0	0.375	0.875	0	0	0.4	-0.12	15.3848
KC6	301.121	4859691	302.128	302.128	-0.4122	302	C14H23O5P	4	14	23	0	5	1	0	0.357	1.643	0	0	-0.2	-1.29	6.80638
KC21	301.121	1763208	302.128	302.128	-0.3129	302	C14H23O5P	4	14	23	0	5	1	0	0.357	1.643	0	0	-0.2	-1.29	8.61812
KC10	301.129	6467740	302.137	302.137	0.3417	302	C14H22O7	4	14	22	0	7	0	0	0.5	1.571	0	0	-0.4	-0.57	4.70328
KC15	301.129	4412160	302.137	302.137	0.4079	302	C14H22O7	4	14	22	0	7	0	0	0.5	1.571	0	0	-0.4	-0.57	14.8472
KC15	301.145	3914490	302.152	302.152	0.0566	302	C18H22O4	8	18	22	0	4	0	0	0.222	1.222	0	0	0.3	-0.78	13.1725
KC21	301.149	2041228	302.156	302.156	-0.059	302	C15H28O2P2	3	15	28	0	2	2	0	0.133	1.867	0	0	-0.1	-2.27	9.97702
KC21	301.166	1644942	302.173	302.173	0.3566	302	C15H26O6	3	15	26	0	6	0	0	0.4	1.733	0	0	-0.3	-0.93	8.04007
KC3	301.181	3952437	302.188	302.188	0.1708	302	C19H26O3	7	19	26	0	3	0	0	0.158	1.368	0	0	0.2	-1.05	12.5743
KC9	301.186	1971501	302.193	302.193	0.0551	302	C16H32OP2	2	16	32	0	1	2	0	0.062	2	0	0	-0.1	-2.5	13.9977
KC6	302.111	5396464	303.118	303.118	0.3877	303	C12H24N3P3	4	12	24	3	0	3	0	0	2	0.25	0	-0.3	-2.5	7.55817
KC10	302.994	4005416	304.001	304.001	0.3568	304	C17H4O6	16	17	4	0	6	0	0	0.353	0.235	0	0	0.9	0.47	2.9127
KC22	303.019	3767166	304.027	304.027	0.1452	304	C11H14O6P2	6	11	14	0	6	2	0	0.545	1.273	0	0	-0.7	-1.09	21.4941
KC6	303.064	3591342	304.071	304.071	-0.4722	304	C12H17O7P	5	12	17	0	7	1	0	0.583	1.417	0	0	-0.8	-0.67	5.02996
KC9	303.071	1535329	304.078	304.078	-0.3536	304	C16H18O2P2	9	16	18	0	2	2	0	0.125	1.125	0	0	0.4	-1.5	10.9009
KC6	303.081	3617988	304.089	304.089	-0.1602	304	C23H12O	18	23	12	0	1	0	0	0.043	0.522	0	0	0.8	-0.43	5.06728
KC15	303.087	4649114	304.095	304.095	0.1252	304	C16H16O6	9	16	16	0	6	0	0	0.375	1	0	0	0.3	-0.25	15.6446
KC3	303.088	5352566	304.095	304.095	0.3883	304	C16H16O6	9	16	16	0	6	0	0	0.375	1	0	0	0.3	-0.25	17.0287
KC2	303.1	5877351	304.107	304.108	-0.4245	304	C13H21O6P	4	13	21	0	6	1	0	0.462	1.615	0	0	-0.5	-1.08	16.4772
KC3	303.109	3906671	304.116	304.116	0.489	304	C13H20O8	4	13	20	0	8	0	0	0.615	1.538	0	0	-0.8	-0.31	12.4287
KC15	303.124	6959248	304.131	304.131	0.2715	304	C17H20O5	8	17	20	0	5	0	0	0.294	1.176	0	0	0.2	-0.59	23.4183
KC3	303.124	6618218	304.131	304.131	0.4359	304	C17H20O5	8	17	20	0	5	0	0	0.294	1.176	0	0	0.2	-0.59	21.0552
KC21	303.137	1596566	304.144	304.144	-0.2124	304	C14H25O5P	3	14	25	0	5	1	0	0.357	1.786	0	0	-0.4	-1.43	7.80362
KC9	303.144	1736302	304.151	304.151	0.4322	304	C18H26P2	7	18	26	0	0	2	0	0	1.444	0	0	0.3	-2	12.3278
KC10	303.145	5889531	304.152	304.152	0.0434	304	C14H24O7	3	14	24	0	7	0	0	0.5	1.714	0	0	-0.6	-0.71	4.28281
KC3	303.145	5401698	304.152	304.152	0.3064	304	C14H24O7	3	14	24	0	7	0	0	0.5	1.714	0	0	-0.6	-0.71	17.185
KC15	303.145	5922954	304.152	304.152	0.405	304	C14H24O7	3	14	24	0	7	0	0	0.5	1.714	0	0	-0.6	-0.71	19.9311
KC15	303.16	5214342	304.168	304.167	0.3848	304	C18H24O4	7	18	24	0	4	0	0	0.222	1.333	0	0	0.2	-0.89	17.5466
KC9	303.175	1722483	304.183	304.183	-0.0299	304	C22H24O	11	22	24	0	1	0	0	0.045	1.091	0	0	0.5	-1	12.2297
KC21	303.218	1792161	304.225	304.225	-0.223	304	C16H32O5	1	16	32	0	5	0	0	0.312	2	0	0	-0.4	-1.38	8.75964
KC2	304.09	4347481	305.098	305.098	0.2064	305	C11H22N3OP3	4	11	22	3	1	3	0	0.091	2	0.2727	0	-0.8	-2.36	12.1882
KC6	304.09	6902258	305.098	305.098	0.3375	305	C11H22N3OP3	4	11	22	3	1	3	0	0.091	2	0.2727	0	-0.8	-2.36	9.66716
KC21	304.923	1544600	305.93	305.93	-0.3701	306	C13H6OS4	11	13	6	0	1	0	4	0.077	0.462	0	0.3077	0.8	0.31	7.54962
KC21	305.009	1703333	306.016	306.016	-0.332	306	C17H6O6	15	17	6	0	6	0	0	0.353	0.353	0	0	0.8	0.35	8.32547
KC21	305.061	1667500	306.068	306.068	0.1527	306	C22H10O2	18	22	10	0	2	0	0	0.091	0.455	0	0	0.8	-0.27	8.15033
KC21	305.097	1607602	306.104	306.104	-0.3227	306	C23H14O	17	23	14	0	1	0	0	0.043	0.609	0	0	0.7	-0.52	7.85756
KC15	305.103	5365411	306.11	306.11	0.2875	306	C16H18O6	8	16	18	0	6	0	0	0.375	1.125	0	0	0.2	-0.38	18.055
KC3	305.103	6613507	306.11	306.11	0.4508	306	C16H18O6	8	16	18	0	6	0	0	0.375	1.125	0	0	0.2	-0.38	21.0402
KC10	305.103	5241859	306.11	306.11	0.4835	306	C16H18O6	8	16	18	0	6	0	0	0.375	1.125	0	0	0.2	-0.38	3.81183
KC2	305.116	6518468	306.123	306.123	-0.4872	306	C13H23O6P	3	13	23	0	6	1	0	0.462	1.769	0	0	-0.7	-1.23	18.2746
KC6	305.116	4165469	306.123	306.123	-0.4219	306	C13H23O6P	3	13	23	0	6	1	0	0.462	1.769	0	0	-0.7	-1.23	5.83407
KC3	305.14	5319161	306.147	306.147	0.4654	306	C17H22O5	7	17	22	0	5	0	0	0.294	1.294	0	0	0.2	-0.71	16.9224
KC15	305.14	4716187	306.147	306.147	0.4981	306	C17H22O5	7	17	22	0	5	0	0	0.294	1.294	0	0	0.2	-0.71	15.8703
KC9	305.148	1563093	306.155	306.155	-0.0181	306	C12H18N8O2	8	12	18	8	2	0	0	0.167	1.5	0.6667	0	-1	0.83	11.098
KC9	305.159	1565655	306.167	306.167	-0.2241	306	C18H28P2	6	18	28	0	0	2	0	0	1.556	0	0	0.2	-2.11	11.1162
KC21	305.159	2076091	306.167	306.167	0.2332	306	C18H28P2	6	18	28	0	0	2	0	0	1.556	0	0	0.2	-2.11	10.1474
KC11	306.919	3865946	307.926	307.926	-0.1683	308	C15H4P4	16	15	4	0	0	4	0	0	0.267	0	0	1.1	-1.6	17.7367
KC21	306.929	1587919	307.936	307.936	0.1224	308	C11HO9P	12	11	1	0	9	1	0	0.818	0.091	0	0	2	1.09	7.76135
KC20	306.972	1712598	307.979	307.979	-0.2005	308	C16H6O3P2	15	16	6	0	3	2	0	0.188	0.375	0	0	0.9	-0.62	8.37075
KC20	307.015	1551581	308.023	308.023	-0.3178	308	C11H10N4O3P2	10	11	10	4	3	2	0	0.273	0.909	0.3636	0	0.5	-0.18	7.58374
KC8	307.017	10783815	308.024	308.024	-0.0632	308	C17H9O4P	14	17	9	0	4	1	0	0.235	0.529	0	0	0.8	-0.35	14.8755
KC2	307.017	7147469	308.024	308.024	0.4562	308	C17H9O4P	14	17	9	0	4	1	0	0.235	0.529	0	0	0.8	-0.35	20.038
KC6	307.017	4248009	308.024	308.024	0.4562	308	C17H9O4P	14	17	9	0	4	1	0	0.235	0.529	0	0	0.8	-0.35	5.94967
KC22	307.019	4251091	308.026	308.026	0.1674	308	C24H4O	23	24	4	0	1	0	0	0.042	0.167	0	0	1	-0.08	24.2552
KC9	307.051	1526086	308.058	308.058	0.2078	308	C11H18O6P2	4	11	18	0	6	2	0	0.545	1.636	0	0	-1.3	-1.45	10.8352
KC18	307.081	3840709	308.088	308.088	0.3951	308	C19H18P2	12	19	18	0	0	2	0	0	0.947	0	0	0.6	-1.47	23.1586
KC9	307.082	1555020	308.09	308.09	-0.0213	308	C15H16O7	8	15	16	0	7	0	0	0.467	1.067	0	0	0.1	-0.13	11.0407
KC15	307.082	6647080	308.09	308.09	0.2059	308	C15H16O7	8	15	16	0	7	0	0	0.467	1.067	0	0	0.1	-0.13	22.3679
KC10	307.082	4783762	308.09	308.09	0.2709	308	C15H16O7	8	15	16	0	7	0	0	0.467	1.067	0	0	0.1	-0.13	3.47871
KC3	307.082	5437449	308.09	308.09	0.4007	308	C15H16O7	8	15	16	0	7	0	0	0.467	1.067	0	0	0.1	-0.13	17.2987
KC16	307.082	4055507	308.09	308.09	0.4981	308	C15H16O7	8	15	16	0	7	0	0	0.467	1.067	0	0	0.1	-0.13	12.9113
KC2	307.095	4493362	308.102	308.102	-0.3691	308	C12H21O7P	3	12	21	0	7	1	0	0.583	1.75	0	0	-1.2	-1	12.5972
KC15	307.119	8023330	308.126	308.126	0.2529	308	C16H20O6	7	16	20	0	6	0	0	0.375	1.25	0	0	0.1	-0.5	26.999
KC10	307.119	7084684	308.126	308.126	0.3503	308	C16H20O6	7	16	20	0	6	0	0	0.375	1.25	0	0	0.1	-0.5	5.15191
KC20	307.123	1771758	308.131	308.131	0.3667	308	C13H26O4P2	2	13	26	0	4	2	0	0.308	2	0	0	-0.6	-2.15	8.65991
KC15	307.155	5057821	308.162	308.162	-0.1219	308	C17H24O5	6	17	24	0	5	0	0	0.294	1.412	0	0	0.1	-0.82	17.0199
KC16	307.155	4059593	308.162	308.162	0.2999	308	C17H24O5	6	17	24	0	5	0	0	0.294	1.412	0	0	0.1	-0.82	12.9243
KC10	307.155	5753479	308.162	308.162	0.3324	308	C17H24O5	6	17	24	0	5	0	0	0.294	1.412	0	0	0.1	-0.82	4.18387
KC20	307.16	1681140	308.167	308.167	-0.0406	308	C14H30O3P2	1	14	30	0	3	2	0	0.214	2.143	0	0	-0.4	-2.43	8.217
KC20	307.168	1620726	308.175	308.175	-0.2749	308	C14H29O5P	1	14	29	0	5	1	0	0.357	2.071	0	0	-0.6	-1.71	7.92171
KC6	308.064	3684282	309.071	309.071	0.2514	309	C13H18N3P3	8	13	18	3	0	3	0	0	1.385	0.2308	0	0.3	-1.85	5.16013
KC9	308.928	1587659	309.935	309.935	0.2002	310	C11H5O5P3	11	11	5	0	5	3	0	0.455	0.455	0	0	1	-0.91	11.2724
KC9	308.935	1523916	309.942	309.942	-0.1029	310	C15H6P4	15	15	6	0	0	4	0	0	0.4	0	0	1	-1.73	10.8198
KC20	309.025	1655340	310.033	310.032	0.498	310	C13H10O9	9	13	10	0	9	0	0	0.692	0.769	0	0	0	0.62	8.09089
KC3	309.062	4130418	310.069	310.069	0.4479	310	C14H14O8	8	14	14	0	8	0	0	0.571	1	0	0	0	0.14	13.1405
KC15	309.098	8690708	310.105	310.105	0.3011	310	C15H18O7	7	15	18	0	7	0	0	0.467	1.2	0	0	0	-0.27	29.2448
KC10	309.098	6912416	310.105	310.105	0.3979	310	C15H18O7	7	15	18	0	7	0	0	0.467	1.2	0	0	0	-0.27	5.02664
KC3	309.098	8324716	310.105	310.105	0.4624	310	C15H18O7	7	15	18	0	7	0	0	0.467	1.2	0	0	0	-0.27	26.4843
KC16	309.098	5431567	310.105	310.105	0.4946	310	C15H18O7	7	15	18	0	7	0	0	0.467	1.2	0	0	0	-0.27	17.2922
KC20	309.126	1613886	310.133	310.133	0.0003	310	C16H23O4P	6	16	23	0	4	1	0	0.25	1.438	0	0	0.1	-1.25	7.88827
KC10	309.134	8051100	310.142	310.142	0.3478	310	C16H22O6	6	16	22	0	6	0	0	0.375	1.375	0	0	0	-0.62	5.85468
KC3	309.134	8840805	310.142	310.142	0.3478	310	C16H22O6	6	16	22	0	6	0	0	0.375	1.375	0	0	0	-0.62	28.1261
KC15	309.134	8457232	310.142	310.142	0.3801	310	C16H22O6	6	16	22	0	6	0	0	0.375	1.375	0	0	0	-0.62	28.4592
KC10	309.171	5298585	310.178	310.178	0.2655	310	C17H26O5	5	17	26	0	5	0	0	0.294	1.529	0	0	0	-0.94	3.85308
KC20	310.174	1955574	311.181	311.181	0.409	311	C12H32N3P3	0	12	32	3	0	3	0	0	2.667	0.25	0	-1	-3.17	9.55836
KC9	310.856	1789554	311.863	311.863	0.1412	312	C7H5O2PS5	6	7	5	0	2	1	5	0.286	0.714	0	0.7143	2	0.57	12.7059
KC9	310.999	1611922	312.006	312.006	0.3945	312	C19H4O5	18	19	4	0	5	0	0	0.263	0.211	0	0	0.9	0.32	11.4447
KC20	311.003	1576333	312.01	312.011	-0.4547	312	C16H10O3P2	13	16	10	0	3	2	0	0.188	0.625	0	0	0.7	-0.88	7.70472
KC6	311.048	4524368	312.055	312.055	-0.191	312	C17H13O4P	12	17	13	0	4	1	0	0.235	0.765	0	0	0.6	-0.59	6.33673
KC20	311.074	1792410	312.081	312.081	-0.2368	312	C11H23O4P3	2	11	23	0	4	3	0	0.364	2.091	0	0	-1.2	-2.73	8.76086
KC10	311.077	4413739	312.085	312.085	0.3808	312	C14H16O8	7	14	16	0	8	0	0	0.571	1.143	0	0	-0.2	0	3.20963
KC3	311.077	6382898	312.085	312.085	0.4769	312	C14H16O8	7	14	16	0	8	0	0	0.571	1.143	0	0	-0.2	0	20.3066
KC20	311.084	1607579	312.091	312.092	-0.4329	312	C18H17O3P	11	18	17	0	3	1	0	0.167	0.944	0	0	0.5	-0.89	7.85745
KC6	311.084	3742088	312.091	312.092	-0.2086	312	C18H17O3P	11	18	17	0	3	1	0	0.167	0.944	0	0	0.5	-0.89	5.24109
KC20	311.098	2194334	312.106	312.106	0.2866	312	C11H20O10	2	11	20	0	10	0	0	0.909	1.818	0	0	-8	0	10.7254
KC1	311.113	4350262	312.12	312.12	0.3255	312	C19H22P2	10	19	22	0	0	2	0	0	1.158	0	0	0.5	-1.68	20.0082
KC18	311.113	5035816	312.12	312.12	0.4537	312	C19H22P2	10	19	22	0	0	2	0	0	1.158	0	0	0.5	-1.68	30.3648
KC15	311.114	7670627	312.121	312.121	0.1708	312	C15H20O7	6	15	20	0	7	0	0	0.467	1.333	0	0	-0.1	-0.4	25.8122
KC10	311.114	8108330	312.121	312.121	0.299	312	C15H20O7	6	15	20	0	7	0	0	0.467	1.333	0	0	-0.1	-0.4	5.8963
KC16	311.114	5880018	312.121	312.121	0.299	312	C15H20O7	6	15	20	0	7	0	0	0.467	1.333	0	0	-0.1	-0.4	18.7199
KC3	311.114	11633965	312.121	312.121	0.4271	312	C15H20O7	6	15	20	0	7	0	0	0.467	1.333	0	0	-0.1	-0.4	37.0123
KC9	311.129	1701040	312.136	312.136	-0.1692	312	C19H20O4	10	19	20	0	4	0	0	0.211	1.053	0	0	0.4	-0.63	12.0774
KC20	311.15	1896872	312.157	312.157	-0.2953	312	C16H24O6	5	16	24	0	6	0	0	0.375	1.5	0	0	-0.1	-0.75	9.27144
KC10	311.15	5876009	312.157	312.157	0.2493	312	C16H24O6	5	16	24	0	6	0	0	0.375	1.5	0	0	-0.1	-0.75	4.27298
KC15	311.15	5401441	312.157	312.157	0.3133	312	C16H24O6	5	16	24	0	6	0	0	0.375	1.5	0	0	-0.1	-0.75	18.1762
KC3	311.15	5181736	312.157	312.157	0.4415	312	C16H24O6	5	16	24	0	6	0	0	0.375	1.5	0	0	-0.1	-0.75	16.4852
KC9	311.163	1530551	312.17	312.17	-0.3503	312	C13H29O6P	0	13	29	0	6	1	0	0.462	2.231	0	0	-1.2	-1.69	10.8669
KC9	312.02	1522556	313.027	313.027	0.2868	313	C12H13NO5P2	8	12	13	1	5	2	0	0.417	1.083	0.0833	0	0	-0.83	10.8102
KC6	312.059	3506040	313.066	313.066	0.2335	313	C12H18N3OP3	7	12	18	3	1	3	0	0.083	1.5	0.25	0	0	-1.83	4.91049
KC6	312.096	4669361	313.103	313.103	0.3755	313	C13H22N3P3	6	13	22	3	0	3	0	0	1.692	0.2308	0	0	-2.15	6.53981
KC20	312.984	1829635	313.991	313.991	0.3672	314	C11H6O11	9	11	6	0	11	0	0	1	0.545	0	0	-999	1.45	8.9428
KC6	313.027	3607921	314.034	314.034	-0.2998	314	C16H11O5P	12	16	11	0	5	1	0	0.312	0.688	0	0	0.6	-0.38	5.05318
KC2	313.027	3953300	314.034	314.034	-0.268	314	C16H11O5P	12	16	11	0	5	1	0	0.312	0.688	0	0	0.6	-0.38	11.0831
KC20	313.055	1622801	314.063	314.063	0.231	314	C17H16O2P2	11	17	16	0	2	2	0	0.118	0.941	0	0	0.5	-1.29	7.93185
KC9	313.056	1947761	314.064	314.064	-0.273	314	C13H14O9	7	13	14	0	9	0	0	0.692	1.077	0	0	-0.5	0.31	13.8291
KC20	313.063	2651923	314.071	314.071	-0.4447	314	C17H15O4P	11	17	15	0	4	1	0	0.235	0.882	0	0	0.5	-0.71	12.9619
KC6	313.063	4720043	314.071	314.071	-0.19	314	C17H15O4P	11	17	15	0	4	1	0	0.235	0.882	0	0	0.5	-0.71	6.61079
KC2	313.064	3975889	314.071	314.071	-0.0308	314	C17H15O4P	11	17	15	0	4	1	0	0.235	0.882	0	0	0.5	-0.71	11.1465
KC9	313.087	1681016	314.094	314.094	-0.0573	314	C21H14O3	15	21	14	0	3	0	0	0.143	0.667	0	0	0.7	-0.38	11.9352
KC15	313.093	5583629	314.1	314.1	0.1871	314	C14H18O8	6	14	18	0	8	0	0	0.571	1.286	0	0	-0.3	-0.14	18.7893
KC10	313.093	5806372	314.1	314.1	0.4099	314	C14H18O8	6	14	18	0	8	0	0	0.571	1.286	0	0	-0.3	-0.14	4.22234
KC20	313.113	1720604	314.12	314.12	-0.0074	314	C15H24O3P2	5	15	24	0	3	2	0	0.2	1.6	0	0	0	-1.87	8.40989
KC9	313.128	1688706	314.135	314.135	-0.3771	314	C19H24P2	9	19	24	0	0	2	0	0	1.263	0	0	0.4	-1.79	11.9898
KC18	313.128	4675091	314.135	314.135	0.3869	314	C19H24P2	9	19	24	0	0	2	0	0	1.263	0	0	0.4	-1.79	28.1897
KC20	313.129	1937183	314.137	314.137	0.1059	314	C15H22O7	5	15	22	0	7	0	0	0.467	1.467	0	0	-0.2	-0.53	9.46847
KC3	313.129	6506565	314.137	314.137	0.3287	314	C15H22O7	5	15	22	0	7	0	0	0.467	1.467	0	0	-0.2	-0.53	20.7
KC10	313.129	7715109	314.137	314.137	0.3924	314	C15H22O7	5	15	22	0	7	0	0	0.467	1.467	0	0	-0.2	-0.53	5.61035
KC15	313.129	6486796	314.137	314.137	0.4879	314	C15H22O7	5	15	22	0	7	0	0	0.467	1.467	0	0	-0.2	-0.53	21.8285
KC9	313.16	1544841	314.167	314.167	0.2896	314	C23H22O	13	23	22	0	1	0	0	0.043	0.957	0	0	0.5	-0.87	10.9684
KC21	313.166	1604390	314.173	314.173	-0.0708	314	C16H26O6	4	16	26	0	6	0	0	0.375	1.625	0	0	-0.2	-0.88	7.84186
KC10	313.166	4239654	314.173	314.173	-0.039	314	C16H26O6	4	16	26	0	6	0	0	0.375	1.625	0	0	-0.2	-0.88	3.08304
KC21	313.239	1560629	314.246	314.246	0.3396	314	C18H34O4	2	18	34	0	4	0	0	0.222	1.889	0	0	-0.1	-1.44	7.62797
KC21	315	1945238	316.007	316.007	0.4279	316	C11H8O11	8	11	8	0	11	0	0	1	0.727	0	0	-999	1.27	9.50784
KC6	315.043	4602394	316.05	316.05	-0.2981	316	C16H13O5P	11	16	13	0	5	1	0	0.312	0.812	0	0	0.5	-0.5	6.44602
KC9	315.045	1673045	316.052	316.052	-0.0734	316	C23H8O2	20	23	8	0	2	0	0	0.087	0.348	0	0	0.9	-0.17	11.8787
KC21	315.049	1569952	316.056	316.056	-0.0235	316	C9H17O10P	2	9	17	0	10	1	0	1.111	1.889	0	0	4.5	-0.22	7.67354
KC10	315.072	4069762	316.079	316.079	0.2031	316	C13H16O9	6	13	16	0	9	0	0	0.692	1.231	0	0	-0.8	0.15	2.95949
KC3	315.072	3840942	316.08	316.079	0.393	316	C13H16O9	6	13	16	0	9	0	0	0.692	1.231	0	0	-0.8	0.15	12.2196
KC6	315.079	3859029	316.086	316.086	-0.3155	316	C17H17O4P	10	17	17	0	4	1	0	0.235	1	0	0	0.4	-0.82	5.40487
KC10	315.081	3910019	316.089	316.089	-0.4072	316	C24H12O	19	24	12	0	1	0	0	0.042	0.5	0	0	0.8	-0.42	2.84333
KC9	315.093	1532001	316.1	316.101	-0.4276	316	C10H20O11	1	10	20	0	11	0	0	1.1	2	0	0	10	0.2	10.8772
KC2	315.1	5193822	316.107	316.108	-0.44	316	C14H21O6P	5	14	21	0	6	1	0	0.429	1.5	0	0	-0.3	-1	14.5609
KC10	315.109	4786821	316.116	316.116	0.4704	316	C14H20O8	5	14	20	0	8	0	0	0.571	1.429	0	0	-0.5	-0.29	3.48093
KC13	315.113	3985205	316.121	316.12	0.17	316	C11H26O6P2	0	11	26	0	6	2	0	0.545	2.364	0	0	-2.7	-2.18	17.9214
KC15	315.124	4311812	316.131	316.131	0.4193	316	C18H20O5	9	18	20	0	5	0	0	0.278	1.111	0	0	0.3	-0.56	14.5095
KC17	315.144	4141837	316.151	316.151	0.4475	316	C19H26P2	8	19	26	0	0	2	0	0	1.368	0	0	0.4	-1.89	9.2625
KC15	315.145	3816196	316.152	316.152	0.1682	316	C15H24O7	4	15	24	0	7	0	0	0.467	1.6	0	0	-0.4	-0.67	12.8418
KC3	315.145	4428714	316.152	316.152	0.3897	316	C15H24O7	4	15	24	0	7	0	0	0.467	1.6	0	0	-0.4	-0.67	14.0895
KC15	315.16	3996420	316.167	316.167	-0.0726	316	C19H24O4	8	19	24	0	4	0	0	0.211	1.263	0	0	0.3	-0.84	13.4482
KC4	315.212	3856098	316.219	316.219	-0.141	316	C24H28	11	24	28	0	0	0	0	0	1.167	0	0	0.5	-1.17	8.94319
KC10	315.254	4151695	316.261	316.261	0.3373	316	C18H36O4	1	18	36	0	4	0	0	0.222	2	0	0	-0.2	-1.56	3.01907
KC6	316.09	4205769	317.098	317.098	0.4824	317	C12H22N3OP3	5	12	22	3	1	3	0	0.083	1.833	0.25	0	-0.4	-2.17	5.89051
KC21	316.986	1607737	317.993	317.993	-0.3562	318	C14H7O7P	12	14	7	0	7	1	0	0.5	0.5	0	0	0.7	0.14	7.85822
KC9	317.007	2025544	318.014	318.014	-0.0083	318	C11H11O9P	7	11	11	0	9	1	0	0.818	1	0	0	-3	0.18	14.3814
KC21	317.025	1780290	318.032	318.032	0.4787	318	C22H6O3	20	22	6	0	3	0	0	0.136	0.273	0	0	0.9	0	8.70162
KC9	317.043	1523281	318.051	318.05	0.3203	318	C12H15O8P	6	12	15	0	8	1	0	0.667	1.25	0	0	-1	-0.33	10.8153
KC21	317.046	1559110	318.053	318.053	0.1034	318	C19H10O5	15	19	10	0	5	0	0	0.263	0.526	0	0	0.7	0	7.62054
KC21	317.056	1574985	318.063	318.063	-0.4883	318	C9H20O8P2	1	9	20	0	8	2	0	0.889	2.222	0	0	9	-1.56	7.69814
KC9	317.065	1539671	318.073	318.073	0.1628	318	C20H16P2	14	20	16	0	0	2	0	0	0.8	0	0	0.7	-1.3	10.9317
KC15	317.067	3898173	318.074	318.074	0.011	318	C16H14O7	10	16	14	0	7	0	0	0.438	0.875	0	0	0.3	0	13.1176
KC9	317.074	1695321	318.081	318.081	-0.41	318	C20H15O2P	14	20	15	0	2	1	0	0.1	0.75	0	0	0.6	-0.8	12.0368
KC2	317.079	4570674	318.087	318.087	-0.483	318	C13H19O7P	5	13	19	0	7	1	0	0.538	1.462	0	0	-0.6	-0.77	12.8139
KC9	317.084	1632348	318.091	318.091	-0.4357	318	C10H25O5P3	0	10	25	0	5	3	0	0.5	2.5	0	0	-4	-3	11.5897
KC10	317.103	4504126	318.11	318.11	0.088	318	C17H18O6	9	17	18	0	6	0	0	0.353	1.059	0	0	0.3	-0.35	3.27536
KC15	317.103	4365119	318.11	318.11	0.1823	318	C17H18O6	9	17	18	0	6	0	0	0.353	1.059	0	0	0.3	-0.35	14.6889
KC21	317.108	1799252	318.115	318.115	0.2611	318	C14H24O4P2	4	14	24	0	4	2	0	0.286	1.714	0	0	-0.2	-1.86	8.7943
KC10	317.124	4082240	318.132	318.131	0.1843	318	C14H22O8	4	14	22	0	8	0	0	0.571	1.571	0	0	-0.7	-0.43	2.96857
KC15	317.14	6798145	318.147	318.147	0.4793	318	C18H22O5	8	18	22	0	5	0	0	0.278	1.222	0	0	0.2	-0.67	22.8762
KC3	317.14	4588373	318.147	318.147	0.4793	318	C18H22O5	8	18	22	0	5	0	0	0.278	1.222	0	0	0.2	-0.67	14.5975
KC9	317.176	1834099	318.183	318.183	0.1162	318	C19H26O4	7	19	26	0	4	0	0	0.211	1.368	0	0	0.2	-0.95	13.0221
KC15	317.176	4160322	318.183	318.183	0.2105	318	C19H26O4	7	19	26	0	4	0	0	0.211	1.368	0	0	0.2	-0.95	13.9998
KC9	317.189	1727095	318.196	318.196	-0.3148	318	C16H31O4P	2	16	31	0	4	1	0	0.25	1.938	0	0	-0.3	-1.75	12.2624
KC21	317.981	1961748	318.989	318.988	0.2255	319	C8H3N9O2P2	13	8	3	9	2	2	0	0.25	0.375	1.125	0	0	2.25	9.58854
KC6	318.106	8136139	319.113	319.113	0.3538	319	C12H24N3OP3	4	12	24	3	1	3	0	0.083	2	0.25	0	-0.6	-2.33	11.3953
KC9	318.978	1896014	319.985	319.985	-0.2343	320	C10H10O8P2	7	10	10	0	8	2	0	0.8	1	0	0	-999	-0.4	13.4617
KC9	318.985	1701456	319.992	319.992	-0.0591	320	C14H11O3P3	11	14	11	0	3	3	0	0.214	0.786	0	0	0.6	-1.43	12.0804
KC21	319.01	1537531	320.017	320.017	-0.111	320	C14H8O9	11	14	8	0	9	0	0	0.643	0.571	0	0	0.4	0.71	7.51507
KC6	319.035	5168087	320.042	320.043	-0.437	320	C8H18O9P2	1	8	18	0	9	2	0	1.125	2.25	0	0	3.3	-1.25	7.23831
KC9	319.035	1729118	320.043	320.043	-0.0933	320	C8H18O9P2	1	8	18	0	9	2	0	1.125	2.25	0	0	3.3	-1.25	12.2768
KC2	319.072	4455591	320.079	320.079	-0.4541	320	C9H22O8P2	0	9	22	0	8	2	0	0.889	2.444	0	0	10	-1.78	12.4913
KC22	319.081	3975235	320.088	320.088	0.2241	320	C20H18P2	13	20	18	0	0	2	0	0	0.9	0	0	0.6	-1.4	22.6813
KC15	319.082	4815796	320.09	320.09	0.4169	320	C16H16O7	9	16	16	0	7	0	0	0.438	1	0	0	0.2	-0.12	16.2055
KC3	319.082	6050619	320.09	320.09	0.4169	320	C16H16O7	9	16	16	0	7	0	0	0.438	1	0	0	0.2	-0.12	19.2494
KC9	319.095	1661038	320.102	320.102	-0.199	320	C13H21O7P	4	13	21	0	7	1	0	0.538	1.615	0	0	-0.8	-0.92	11.7934
KC2	319.113	3824885	320.12	320.12	0.0974	320	C24H16O	17	24	16	0	1	0	0	0.042	0.667	0	0	0.7	-0.58	10.7231
KC15	319.119	6835127	320.126	320.126	0.3372	320	C17H20O6	8	17	20	0	6	0	0	0.353	1.176	0	0	0.2	-0.47	23.0007
KC10	319.119	4897610	320.126	320.126	0.3372	320	C17H20O6	8	17	20	0	6	0	0	0.353	1.176	0	0	0.2	-0.47	3.56149
KC21	319.123	1561109	320.131	320.131	0.1655	320	C14H26O4P2	3	14	26	0	4	2	0	0.286	1.857	0	0	-0.4	-2	7.63031
KC16	319.155	3802193	320.162	320.162	0.195	320	C18H24O5	7	18	24	0	5	0	0	0.278	1.333	0	0	0.2	-0.78	12.1048
KC3	319.155	6898491	320.162	320.162	0.2887	320	C18H24O5	7	18	24	0	5	0	0	0.278	1.333	0	0	0.2	-0.78	21.9469
KC10	319.155	5368655	320.163	320.162	0.4136	320	C18H24O5	7	18	24	0	5	0	0	0.278	1.333	0	0	0.2	-0.78	3.90403
KC15	319.155	5782458	320.163	320.162	0.4761	320	C18H24O5	7	18	24	0	5	0	0	0.278	1.333	0	0	0.2	-0.78	19.4584
KC3	319.192	3871547	320.199	320.199	0.3651	320	C19H28O4	6	19	28	0	4	0	0	0.211	1.474	0	0	0.1	-1.05	12.3169
KC9	319.264	1553563	320.271	320.272	-0.4812	320	C21H36O2	4	21	36	0	2	0	0	0.095	1.714	0	0	0.1	-1.52	11.0303
KC4	320.922	5760142	321.929	321.929	0.0164	322	C19HP3	21	19	1	0	0	3	0	0	0.053	0	0	1.1	-0.84	13.3591
KC12	320.922	5225124	321.929	321.929	0.0785	322	C19HP3	21	19	1	0	0	3	0	0	0.053	0	0	1.1	-0.84	10.4463
KC21	321.047	1644501	322.055	322.055	-0.0487	322	C22H11OP	18	22	11	0	1	1	0	0.045	0.5	0	0	0.8	-0.64	8.03791
KC21	321.061	2001369	322.069	322.069	-0.3139	322	C15H14O8	9	15	14	0	8	0	0	0.533	0.933	0	0	0.1	0.13	9.78219
KC21	321.09	1552863	322.097	322.097	-0.1379	322	C16H19O5P	8	16	19	0	5	1	0	0.312	1.188	0	0	0.2	-0.88	7.59001
KC1	321.097	4406454	322.104	322.104	0.0983	322	C20H20P2	12	20	20	0	0	2	0	0	1	0	0	0.6	-1.5	20.2666
KC17	321.097	4224740	322.104	322.104	0.4398	322	C20H20P2	12	20	20	0	0	2	0	0	1	0	0	0.6	-1.5	9.4479
KC10	321.098	5594261	322.105	322.105	0.3831	322	C16H18O7	8	16	18	0	7	0	0	0.438	1.125	0	0	0.1	-0.25	4.06809
KC15	321.098	7605341	322.105	322.105	0.4141	322	C16H18O7	8	16	18	0	7	0	0	0.438	1.125	0	0	0.1	-0.25	25.5925
KC3	321.098	7766867	322.105	322.105	0.4451	322	C16H18O7	8	16	18	0	7	0	0	0.438	1.125	0	0	0.1	-0.25	24.7095
KC2	321.111	6892517	322.118	322.118	-0.4463	322	C13H23O7P	3	13	23	0	7	1	0	0.538	1.769	0	0	-1	-1.08	19.3233
KC15	321.134	8371296	322.142	322.142	0.3038	322	C17H22O6	7	17	22	0	6	0	0	0.353	1.294	0	0	0.1	-0.59	28.17
KC10	321.134	6712476	322.142	322.142	0.3659	322	C17H22O6	7	17	22	0	6	0	0	0.353	1.294	0	0	0.1	-0.59	4.88125
KC3	321.135	9085779	322.142	322.142	0.4901	322	C17H22O6	7	17	22	0	6	0	0	0.353	1.294	0	0	0.1	-0.59	28.9055
KC2	321.147	5078060	322.154	322.155	-0.4944	322	C14H27O6P	2	14	27	0	6	1	0	0.429	1.929	0	0	-0.7	-1.43	14.2364
KC11	321.171	3814054	322.178	322.178	0.0694	322	C18H26O5	6	18	26	0	5	0	0	0.278	1.444	0	0	0.1	-0.89	17.4986
KC15	321.171	7044196	322.178	322.178	0.4729	322	C18H26O5	6	18	26	0	5	0	0	0.278	1.444	0	0	0.1	-0.89	23.7042
KC9	321.192	1560232	322.199	322.199	-0.3942	322	C15H30O7	1	15	30	0	7	0	0	0.467	2	0	0	-0.8	-1.07	11.0777
KC3	322.106	5306224	323.113	323.113	0.0534	323	C12H22NO7P	3	12	22	1	7	1	0	0.583	1.833	0.0833	0	-2	-0.83	16.8812
KC9	322.914	1525898	323.921	323.921	-0.3286	324	C15H4OP4	16	15	4	0	1	4	0	0.067	0.267	0	0	1.1	-1.47	10.8339
KC21	322.959	1679783	323.966	323.966	0.2032	324	C16H7O2P3	15	16	7	0	2	3	0	0.125	0.438	0	0	0.9	-1.12	8.21036
KC21	322.997	1588657	324.004	324.004	-0.0734	324	C8H6N8O3P2	11	8	6	8	3	2	0	0.375	0.75	1	0	0.4	1.75	7.76496
KC21	323.056	1541055	324.063	324.063	0.0561	324	C18H12O6	13	18	12	0	6	0	0	0.333	0.667	0	0	0.6	0	7.53229
KC5	323.076	4526095	324.083	324.083	0.4848	324	C19H18OP2	12	19	18	0	1	2	0	0.053	0.947	0	0	0.6	-1.37	8.09965
KC15	323.077	3841321	324.085	324.085	0.089	324	C15H16O8	8	15	16	0	8	0	0	0.533	1.067	0	0	0	0	12.9263
KC3	323.077	6173589	324.085	324.085	0.4592	324	C15H16O8	8	15	16	0	8	0	0	0.533	1.067	0	0	0	0	19.6407
KC2	323.084	3781367	324.092	324.092	-0.0466	324	C19H17O3P	12	19	17	0	3	1	0	0.158	0.895	0	0	0.5	-0.84	10.6011
KC9	323.097	1598141	324.105	324.104	0.425	324	C16H22O3P2	7	16	22	0	3	2	0	0.188	1.375	0	0	0.2	-1.62	11.3468
KC9	323.099	1532606	324.107	324.107	-0.1581	324	C23H17P	16	23	17	0	0	1	0	0	0.739	0	0	0.7	-0.96	10.8815
KC9	323.112	2327746	324.12	324.12	-0.0259	324	C20H22P2	11	20	22	0	0	2	0	0	1.1	0	0	0.5	-1.6	16.527
KC1	323.112	4741280	324.12	324.12	0.0975	324	C20H22P2	11	20	22	0	0	2	0	0	1.1	0	0	0.5	-1.6	21.8066
KC17	323.112	5332552	324.12	324.12	0.1283	324	C20H22P2	11	20	22	0	0	2	0	0	1.1	0	0	0.5	-1.6	11.9253
KC18	323.112	4109958	324.12	324.12	0.2517	324	C20H22P2	11	20	22	0	0	2	0	0	1.1	0	0	0.5	-1.6	24.7821
KC9	323.114	1727682	324.121	324.121	-0.2057	324	C16H20O7	7	16	20	0	7	0	0	0.438	1.25	0	0	0	-0.38	12.2666
KC10	323.114	8797728	324.121	324.121	0.3188	324	C16H20O7	7	16	20	0	7	0	0	0.438	1.25	0	0	0	-0.38	6.39762
KC15	323.114	12139821	324.121	324.121	0.3496	324	C16H20O7	7	16	20	0	7	0	0	0.438	1.25	0	0	0	-0.38	40.8513
KC2	323.126	3679050	324.134	324.134	-0.0736	324	C13H25O7P	2	13	25	0	7	1	0	0.538	1.923	0	0	-1.2	-1.23	10.3143
KC11	323.15	3905965	324.157	324.157	-0.2227	324	C17H24O6	6	17	24	0	6	0	0	0.353	1.412	0	0	0	-0.71	17.9203
KC3	323.15	7362456	324.157	324.157	0.4251	324	C17H24O6	6	17	24	0	6	0	0	0.353	1.412	0	0	0	-0.71	23.4229
KC15	323.15	7208241	324.157	324.157	0.456	324	C17H24O6	6	17	24	0	6	0	0	0.353	1.412	0	0	0	-0.71	24.2562
KC9	323.17	1738450	324.177	324.177	0.4834	324	C18H30OP2	5	18	30	0	1	2	0	0.056	1.667	0	0	0.1	-2.11	12.343
KC15	323.187	3829045	324.194	324.194	0.3464	324	C18H28O5	5	18	28	0	5	0	0	0.278	1.556	0	0	0	-1	12.885
KC10	323.187	4091440	324.194	324.194	0.4081	324	C18H28O5	5	18	28	0	5	0	0	0.278	1.556	0	0	0	-1	2.97526
KC21	324.095	1703109	325.103	325.103	-0.4073	325	C14H22N3P3	7	14	22	3	0	3	0	0	1.571	0.2143	0	0.1	-2	8.32437
KC21	324.893	1735058	325.901	325.901	0.181	326	C14H2O2P4	16	14	2	0	2	4	0	0.143	0.143	0	0	1.2	-1.29	8.48053
KC19	324.917	20083300	325.924	325.924	-0.4275	326	C18HOP3	20	18	1	0	1	3	0	0.056	0.056	0	0	1.1	-0.78	56.8862
KC5	324.917	14012507	325.924	325.924	-0.3355	326	C18HOP3	20	18	1	0	1	3	0	0.056	0.056	0	0	1.1	-0.78	25.076
KC12	324.917	24486418	325.924	325.924	-0.1207	326	C18HOP3	20	18	1	0	1	3	0	0.056	0.056	0	0	1.1	-0.78	48.9546
KC4	324.917	19817490	325.924	325.924	-0.09	326	C18HOP3	20	18	1	0	1	3	0	0.056	0.056	0	0	1.1	-0.78	45.9614
KC21	324.917	2928025	325.924	325.924	0.0634	326	C18HOP3	20	18	1	0	1	3	0	0.056	0.056	0	0	1.1	-0.78	14.3115
KC9	325.055	1644269	326.062	326.062	0.1601	326	C11H6N10O3	14	11	6	10	3	0	0	0.273	0.545	0.9091	0	-0.5	2.73	11.6743
KC9	325.055	1644269	326.062	326.063	-0.2069	326	C18H16O2P2	12	18	16	0	2	2	0	0.111	0.889	0	0	0.6	-1.22	11.6743
KC2	325.063	5511750	326.071	326.071	-0.3363	326	C18H15O4P	12	18	15	0	4	1	0	0.222	0.833	0	0	0.5	-0.67	15.4523
KC6	325.063	4244323	326.071	326.071	-0.3363	326	C18H15O4P	12	18	15	0	4	1	0	0.222	0.833	0	0	0.5	-0.67	5.94451
KC9	325.093	1581304	326.1	326.1	-0.3411	326	C15H18O8	7	15	18	0	8	0	0	0.533	1.2	0	0	-0.1	-0.13	11.2273
KC15	325.093	6991383	326.1	326.1	0.3029	326	C15H18O8	7	15	18	0	8	0	0	0.533	1.2	0	0	-0.1	-0.13	23.5265
KC2	325.1	4262543	326.107	326.107	-0.3838	326	C19H19O3P	11	19	19	0	3	1	0	0.158	1	0	0	0.5	-0.95	11.9501
KC9	325.128	2276098	326.135	326.135	0.0047	326	C20H24P2	10	20	24	0	0	2	0	0	1.2	0	0	0.4	-1.7	16.1603
KC18	325.128	7100304	326.135	326.135	0.2193	326	C20H24P2	10	20	24	0	0	2	0	0	1.2	0	0	0.4	-1.7	42.8131
KC17	325.128	8553948	326.135	326.135	0.2806	326	C20H24P2	10	20	24	0	0	2	0	0	1.2	0	0	0.4	-1.7	19.1294
KC11	325.129	4133093	326.136	326.137	-0.266	326	C16H22O7	6	16	22	0	7	0	0	0.438	1.375	0	0	-0.1	-0.5	18.9623
KC10	325.129	9965532	326.137	326.137	0.2553	326	C16H22O7	6	16	22	0	7	0	0	0.438	1.375	0	0	-0.1	-0.5	7.24684
KC15	325.129	9883163	326.137	326.137	0.3473	326	C16H22O7	6	16	22	0	7	0	0	0.438	1.375	0	0	-0.1	-0.5	33.2575
KC3	325.129	13444093	326.137	326.137	0.4086	326	C16H22O7	6	16	22	0	7	0	0	0.438	1.375	0	0	-0.1	-0.5	42.771
KC15	325.166	4939296	326.173	326.173	0.2997	326	C17H26O6	5	17	26	0	6	0	0	0.353	1.529	0	0	-0.1	-0.82	16.6211
KC10	325.166	4198373	326.173	326.173	0.453	326	C17H26O6	5	17	26	0	6	0	0	0.353	1.529	0	0	-0.1	-0.82	3.05302
KC3	325.166	5276671	326.173	326.173	0.4836	326	C17H26O6	5	17	26	0	6	0	0	0.353	1.529	0	0	-0.1	-0.82	16.7872
KC21	326.075	2363080	327.082	327.082	-0.113	327	C13H20N3OP3	7	13	20	3	1	3	0	0.077	1.538	0.2308	0	0	-1.85	11.5501
KC21	326.131	1659095	327.138	327.138	0.3421	327	C13H23N5OP2	6	13	23	5	1	2	0	0.077	1.769	0.3846	0	-0.4	-1.23	8.10924
KC9	326.181	1709620	327.188	327.188	-0.0377	327	C17H31NOP2	4	17	31	1	1	2	0	0.059	1.824	0.0588	0	0	-2.12	12.1383
KC21	326.925	1964972	327.933	327.933	-0.1387	328	C14H2O6P2	15	14	2	0	6	2	0	0.429	0.143	0	0	1.2	0	9.6043
KC2	326.925	4147395	327.933	327.933	-0.0472	328	C14H2O6P2	15	14	2	0	6	2	0	0.429	0.143	0	0	1.2	0	11.6273
KC9	326.985	1575200	327.993	327.993	0.124	328	C19H5O4P	18	19	5	0	4	1	0	0.211	0.263	0	0	0.9	-0.11	11.184
KC6	327.043	4272204	328.05	328.05	-0.4396	328	C17H13O5P	12	17	13	0	5	1	0	0.294	0.765	0	0	0.5	-0.47	5.98356
KC2	327.064	3783127	328.071	328.071	-0.4072	328	C14H17O7P	7	14	17	0	7	1	0	0.5	1.214	0	0	-0.2	-0.57	10.606
KC6	327.079	4108424	328.086	328.086	-0.3649	328	C18H17O4P	11	18	17	0	4	1	0	0.222	0.944	0	0	0.5	-0.78	5.75417
KC2	327.079	4988405	328.086	328.086	-0.1516	328	C18H17O4P	11	18	17	0	4	1	0	0.222	0.944	0	0	0.5	-0.78	13.9851
KC3	327.087	4035706	328.095	328.095	0.2684	328	C18H16O6	11	18	16	0	6	0	0	0.333	0.889	0	0	0.4	-0.22	12.8392
KC10	327.109	9011636	328.116	328.116	0.3313	328	C15H20O8	6	15	20	0	8	0	0	0.533	1.333	0	0	-0.3	-0.27	6.55317
KC15	327.109	7159576	328.116	328.116	0.3618	328	C15H20O8	6	15	20	0	8	0	0	0.533	1.333	0	0	-0.3	-0.27	24.0925
KC18	327.144	4028631	328.151	328.151	0.0349	328	C20H26P2	9	20	26	0	0	2	0	0	1.3	0	0	0.4	-1.8	24.2917
KC9	327.144	1843023	328.151	328.151	0.1568	328	C20H26P2	9	20	26	0	0	2	0	0	1.3	0	0	0.4	-1.8	13.0855
KC16	327.145	5057743	328.152	328.152	0.1926	328	C16H24O7	5	16	24	0	7	0	0	0.438	1.5	0	0	-0.2	-0.62	16.1021
KC10	327.145	6754750	328.152	328.152	0.3145	328	C16H24O7	5	16	24	0	7	0	0	0.438	1.5	0	0	-0.2	-0.62	4.91199
KC3	327.145	6407294	328.152	328.152	0.4668	328	C16H24O7	5	16	24	0	7	0	0	0.438	1.5	0	0	-0.2	-0.62	20.3842
KC15	327.145	5037853	328.152	328.152	0.4973	328	C16H24O7	5	16	24	0	7	0	0	0.438	1.5	0	0	-0.2	-0.62	16.9527
KC10	327.181	3951046	328.189	328.189	0.2367	328	C17H28O6	4	17	28	0	6	0	0	0.353	1.647	0	0	-0.2	-0.94	2.87316
KC14	327.181	4017503	328.189	328.189	0.3281	328	C17H28O6	4	17	28	0	6	0	0	0.353	1.647	0	0	-0.2	-0.94	9.02552
KC9	327.291	1605498	328.298	328.298	0.4604	328	C20H40O3	1	20	40	0	3	0	0	0.15	2	0	0	-0.1	-1.7	11.3991
KC9	328.038	1539159	329.045	329.045	-0.0401	329	C16H12NO5P	12	16	12	1	5	1	0	0.312	0.75	0.0625	0	0.6	-0.25	10.9281
KC6	328.09	4200212	329.098	329.098	0.0698	329	C13H22N3OP3	6	13	22	3	1	3	0	0.077	1.692	0.2308	0	-0.2	-2	5.88273
KC6	328.127	4241232	329.134	329.134	0.0834	329	C14H26N3P3	5	14	26	3	0	3	0	0	1.857	0.2143	0	-0.1	-2.29	5.94018
KC9	328.934	1743201	329.941	329.941	-0.0049	330	C10H3O11P	10	10	3	0	11	1	0	1.1	0.3	0	0	1	1.4	12.3768
KC20	328.956	1731035	329.963	329.964	-0.2779	330	C18H4O3P2	18	18	4	0	3	2	0	0.167	0.222	0	0	1	-0.44	8.46087
KC5	328.999	3841301	330.006	330.006	0.423	330	C12H12O7P2	8	12	12	0	7	2	0	0.583	1	0	0	-0.3	-0.67	6.87418
KC9	329.035	1664895	330.042	330.042	0.3759	330	C13H16O6P2	7	13	16	0	6	2	0	0.462	1.231	0	0	-0.2	-1.08	11.8208
KC6	329.058	6212940	330.066	330.066	-0.4068	330	C17H15O5P	11	17	15	0	5	1	0	0.294	0.882	0	0	0.5	-0.59	8.70171
KC2	329.058	4843862	330.066	330.066	-0.3462	330	C17H15O5P	11	17	15	0	5	1	0	0.294	0.882	0	0	0.5	-0.59	13.5798
KC15	329.088	3940382	330.095	330.095	0.2549	330	C14H18O9	6	14	18	0	9	0	0	0.643	1.286	0	0	-0.6	0	13.2596
KC6	329.095	3775880	330.102	330.102	-0.3932	330	C18H19O4P	10	18	19	0	4	1	0	0.222	1.056	0	0	0.4	-0.89	5.28842
KC2	329.095	3807646	330.102	330.102	-0.2114	330	C18H19O4P	10	18	19	0	4	1	0	0.222	1.056	0	0	0.4	-0.89	10.6748
KC15	329.103	3961376	330.11	330.11	0.0848	330	C18H18O6	10	18	18	0	6	0	0	0.333	1	0	0	0.3	-0.33	13.3303
KC3	329.103	3958028	330.11	330.11	0.3272	330	C18H18O6	10	18	18	0	6	0	0	0.333	1	0	0	0.3	-0.33	12.5921
KC20	329.116	2028040	330.123	330.123	-0.4518	330	C15H23O6P	5	15	23	0	6	1	0	0.4	1.533	0	0	-0.2	-1.07	9.91256
KC20	329.121	1856010	330.128	330.128	0.2905	330	C12H29O4P3	0	12	29	0	4	3	0	0.333	2.417	0	0	-1.4	-3	9.07172
KC5	329.123	6696190	330.13	330.13	0.4753	330	C19H24OP2	9	19	24	0	1	2	0	0.053	1.263	0	0	0.4	-1.68	11.9831
KC10	329.124	6976432	330.132	330.131	0.3896	330	C15H22O8	5	15	22	0	8	0	0	0.533	1.467	0	0	-0.4	-0.4	5.07319
KC15	329.124	4034595	330.132	330.131	0.4502	330	C15H22O8	5	15	22	0	8	0	0	0.533	1.467	0	0	-0.4	-0.4	13.5767
KC3	329.124	5604622	330.132	330.131	0.4502	330	C15H22O8	5	15	22	0	8	0	0	0.533	1.467	0	0	-0.4	-0.4	17.8305
KC15	329.14	4614181	330.147	330.147	0.3104	330	C19H22O5	9	19	22	0	5	0	0	0.263	1.158	0	0	0.3	-0.63	15.527
KC9	329.159	1740708	330.167	330.167	-0.0866	330	C20H28P2	8	20	28	0	0	2	0	0	1.4	0	0	0.3	-1.9	12.3591
KC5	329.159	4383991	330.167	330.167	0.3677	330	C20H28P2	8	20	28	0	0	2	0	0	1.4	0	0	0.3	-1.9	7.84535
KC3	329.176	3951890	330.183	330.183	0.2029	330	C20H26O4	8	20	26	0	4	0	0	0.2	1.3	0	0	0.2	-0.9	12.5725
KC10	329.233	3838924	330.241	330.241	0.3092	330	C18H34O5	2	18	34	0	5	0	0	0.278	1.889	0	0	-0.2	-1.33	2.79163
KC6	330.106	6464506	331.113	331.113	0.039	331	C13H24N3OP3	5	13	24	3	1	3	0	0.077	1.846	0.2308	0	-0.3	-2.15	9.05405
KC2	330.106	4034925	331.113	331.113	0.4014	331	C13H24N3OP3	5	13	24	3	1	3	0	0.077	1.846	0.2308	0	-0.3	-2.15	11.312
KC6	330.142	5739573	331.15	331.15	0.1129	331	C14H28N3P3	4	14	28	3	0	3	0	0	2	0.2143	0	-0.2	-2.43	8.03872
KC20	330.933	1753617	331.94	331.94	-0.2629	332	C10H7O7P3	9	10	7	0	7	3	0	0.7	0.7	0	0	-999	-0.8	8.57124
KC4	331.081	3871924	332.088	332.088	0.1558	332	C21H18P2	14	21	18	0	0	2	0	0	0.857	0	0	0.6	-1.33	8.97989
KC3	331.082	4978085	332.09	332.09	0.3717	332	C17H16O7	10	17	16	0	7	0	0	0.412	0.941	0	0	0.3	-0.12	15.8373
KC2	331.095	6465796	332.102	332.102	-0.4628	332	C14H21O7P	5	14	21	0	7	1	0	0.5	1.5	0	0	-0.5	-0.86	18.1269
KC10	331.104	4224433	332.111	332.111	0.2833	332	C14H20O9	5	14	20	0	9	0	0	0.643	1.429	0	0	-0.8	-0.14	3.07197
KC3	331.104	3999143	332.111	332.111	0.4639	332	C14H20O9	5	14	20	0	9	0	0	0.643	1.429	0	0	-0.8	-0.14	12.7229
KC15	331.119	4520235	332.126	332.126	0.0841	332	C18H20O6	9	18	20	0	6	0	0	0.333	1.111	0	0	0.2	-0.44	15.2109
KC3	331.119	6145448	332.126	332.126	0.3852	332	C18H20O6	9	18	20	0	6	0	0	0.333	1.111	0	0	0.2	-0.44	19.5511
KC5	331.139	3931033	332.146	332.146	0.3217	332	C19H26OP2	8	19	26	0	1	2	0	0.053	1.368	0	0	0.3	-1.79	7.03476
KC6	331.149	15313551	332.156	332.157	-0.3141	332	C26H20	17	26	20	0	0	0	0	0	0.769	0	0	0.7	-0.77	21.4478
KC2	331.149	9595246	332.156	332.157	-0.1937	332	C26H20	17	26	20	0	0	0	0	0	0.769	0	0	0.7	-0.77	26.9004
KC15	331.155	4981040	332.162	332.162	0.0675	332	C19H24O5	8	19	24	0	5	0	0	0.263	1.263	0	0	0.2	-0.74	16.7615
KC3	331.155	5633451	332.163	332.162	0.4288	332	C19H24O5	8	19	24	0	5	0	0	0.263	1.263	0	0	0.2	-0.74	17.9223
KC17	331.264	4443436	332.272	332.272	0.3488	332	C22H36O2	5	22	36	0	2	0	0	0.091	1.636	0	0	0.2	-1.45	9.93698
KC6	332.122	8339618	333.129	333.129	0.0685	333	C13H26N3OP3	4	13	26	3	1	3	0	0.077	2	0.2308	0	-0.5	-2.31	11.6803
KC20	333.003	1663095	334.01	334.01	-0.1436	334	C22H8P2	20	22	8	0	0	2	0	0	0.364	0	0	0.9	-0.82	8.1288
KC9	333.004	1540652	334.011	334.011	-0.2282	334	C18H6O7	16	18	6	0	7	0	0	0.389	0.333	0	0	0.8	0.44	10.9387
KC20	333.011	1977977	334.018	334.018	0.3588	334	C22H7O2P	20	22	7	0	2	1	0	0.091	0.318	0	0	0.9	-0.36	9.66786
KC6	333.092	3831454	334.099	334.099	-0.4292	334	C24H14O2	18	24	14	0	2	0	0	0.083	0.583	0	0	0.7	-0.42	5.36625
KC5	333.097	4340314	334.104	334.104	0.4539	334	C21H20P2	13	21	20	0	0	2	0	0	0.952	0	0	0.6	-1.43	7.76718
KC10	333.098	3840955	334.105	334.105	0.1298	334	C17H18O7	9	17	18	0	7	0	0	0.412	1.059	0	0	0.2	-0.24	2.79311
KC15	333.098	4745768	334.105	334.105	0.1897	334	C17H18O7	9	17	18	0	7	0	0	0.412	1.059	0	0	0.2	-0.24	15.9698
KC3	333.134	7059012	334.142	334.142	0.3228	334	C18H22O6	8	18	22	0	6	0	0	0.333	1.222	0	0	0.2	-0.56	22.4575
KC10	333.134	6027204	334.142	334.142	0.3827	334	C18H22O6	8	18	22	0	6	0	0	0.333	1.222	0	0	0.2	-0.56	4.38292
KC15	333.135	5411372	334.142	334.142	0.4126	334	C18H22O6	8	18	22	0	6	0	0	0.333	1.222	0	0	0.2	-0.56	18.2096
KC20	333.141	1676449	334.149	334.149	0.0716	334	C22H23OP	12	22	23	0	1	1	0	0.045	1.045	0	0	0.5	-1.18	8.19407
KC15	333.171	5915185	334.178	334.178	0.3961	334	C19H26O5	7	19	26	0	5	0	0	0.263	1.368	0	0	0.1	-0.84	19.905
KC20	333.222	1756857	334.23	334.23	-0.0577	334	C24H30O	10	24	30	0	1	0	0	0.042	1.25	0	0	0.4	-1.17	8.58708
KC9	333.938	1563976	334.945	334.945	-0.0987	335	C16H4NO2P3	17	16	4	1	2	3	0	0.125	0.25	0.0625	0	1.1	-0.75	11.1043
KC14	334.939	4883121	335.946	335.946	-0.158	336	C16HO7P	17	16	1	0	7	1	0	0.438	0.062	0	0	1.1	0.5	10.9702
KC20	334.975	1621717	335.982	335.982	-0.1446	336	C17H5O6P	16	17	5	0	6	1	0	0.353	0.294	0	0	0.9	0.12	7.92655
KC20	334.998	1830108	336.006	336.006	-0.3182	336	C21H4O5	20	21	4	0	5	0	0	0.238	0.19	0	0	0.9	0.29	8.94511
KC16	335.005	3823474	336.012	336.012	0.2674	336	C14H8O10	11	14	8	0	10	0	0	0.714	0.571	0	0	0.2	0.86	12.1726
KC9	335.017	1543314	336.025	336.025	-0.2896	336	C11H13O10P	6	11	13	0	10	1	0	0.909	1.182	0	0	-999	0.18	10.9576
KC1	335.063	3903564	336.07	336.07	-0.1658	336	C23H13OP	18	23	13	0	1	1	0	0.043	0.565	0	0	0.8	-0.7	17.9537
KC9	335.071	1640098	336.079	336.079	-0.2319	336	C23H12O3	18	23	12	0	3	0	0	0.13	0.522	0	0	0.8	-0.26	11.6447
KC5	335.076	4208944	336.083	336.083	0.4972	336	C20H18OP2	13	20	18	0	1	2	0	0.05	0.9	0	0	0.6	-1.3	7.53209
KC15	335.077	4674321	336.085	336.085	0.2643	336	C16H16O8	9	16	16	0	8	0	0	0.5	1	0	0	0.1	0	15.7294
KC10	335.077	4147643	336.085	336.085	0.3536	336	C16H16O8	9	16	16	0	8	0	0	0.5	1	0	0	0.1	0	3.01613
KC2	335.09	3925733	336.097	336.097	-0.4116	336	C13H21O8P	4	13	21	0	8	1	0	0.615	1.615	0	0	-1.2	-0.77	11.0058
KC18	335.112	4751262	336.12	336.12	-0.1143	336	C21H22P2	12	21	22	0	0	2	0	0	1.048	0	0	0.5	-1.52	28.649
KC17	335.112	4010785	336.12	336.12	0.2725	336	C21H22P2	12	21	22	0	0	2	0	0	1.048	0	0	0.5	-1.52	8.96943
KC19	335.112	4278043	336.12	336.12	0.2725	336	C21H22P2	12	21	22	0	0	2	0	0	1.048	0	0	0.5	-1.52	12.1176
KC5	335.113	7522603	336.12	336.12	0.332	336	C21H22P2	12	21	22	0	0	2	0	0	1.048	0	0	0.5	-1.52	13.462
KC9	335.113	1867439	336.12	336.12	0.332	336	C21H22P2	12	21	22	0	0	2	0	0	1.048	0	0	0.5	-1.52	13.2589
KC6	335.113	8602321	336.12	336.12	0.451	336	C21H22P2	12	21	22	0	0	2	0	0	1.048	0	0	0.5	-1.52	12.0482
KC16	335.114	5687192	336.121	336.121	0.1884	336	C17H20O7	8	17	20	0	7	0	0	0.412	1.176	0	0	0.1	-0.35	18.106
KC15	335.114	7111445	336.121	336.121	0.3074	336	C17H20O7	8	17	20	0	7	0	0	0.412	1.176	0	0	0.1	-0.35	23.9305
KC3	335.114	9684694	336.121	336.121	0.4264	336	C17H20O7	8	17	20	0	7	0	0	0.412	1.176	0	0	0.1	-0.35	30.8109
KC15	335.15	7447321	336.157	336.157	0.2612	336	C18H24O6	7	18	24	0	6	0	0	0.333	1.333	0	0	0.1	-0.67	25.0607
KC3	335.15	10315481	336.157	336.157	0.3207	336	C18H24O6	7	18	24	0	6	0	0	0.333	1.333	0	0	0.1	-0.67	32.8177
KC10	335.15	8165838	336.157	336.157	0.41	336	C18H24O6	7	18	24	0	6	0	0	0.333	1.333	0	0	0.1	-0.67	5.93812
KC11	335.186	4351334	336.194	336.194	0.1258	336	C19H28O5	6	19	28	0	5	0	0	0.263	1.474	0	0	0.1	-0.95	19.9636
KC3	335.187	6366939	336.194	336.194	0.4233	336	C19H28O5	6	19	28	0	5	0	0	0.263	1.474	0	0	0.1	-0.95	20.2558
KC15	335.187	4455197	336.194	336.194	0.4828	336	C19H28O5	6	19	28	0	5	0	0	0.263	1.474	0	0	0.1	-0.95	14.992
KC9	336.112	1565664	337.119	337.119	0.2764	337	C15H20N3O4P	8	15	20	3	4	1	0	0.267	1.333	0.2	0	0	-0.53	11.1162
KC18	336.901	4006241	337.909	337.909	-0.335	338	C15HO4P3	17	15	1	0	4	3	0	0.267	0.067	0	0	1.2	-0.53	24.1567
KC9	336.917	1746135	337.924	337.924	0.1203	338	C19HOP3	21	19	1	0	1	3	0	0.053	0.053	0	0	1.1	-0.74	12.3976
KC9	337.011	1735923	338.018	338.018	-0.0584	338	C18H13OP3	14	18	13	0	1	3	0	0.056	0.722	0	0	0.7	-1.44	12.3251
KC17	337.055	4026812	338.063	338.063	-0.0516	338	C19H16O2P2	13	19	16	0	2	2	0	0.105	0.842	0	0	0.6	-1.16	9.00527
KC2	337.063	3712255	338.071	338.071	-0.3244	338	C19H15O4P	13	19	15	0	4	1	0	0.211	0.789	0	0	0.6	-0.63	10.4074
KC1	337.092	4070287	338.099	338.099	-0.2454	338	C20H20OP2	12	20	20	0	1	2	0	0.05	1	0	0	0.5	-1.4	18.7205
KC18	337.092	4321682	338.099	338.099	-0.1566	338	C20H20OP2	12	20	20	0	1	2	0	0.05	1	0	0	0.5	-1.4	26.0587
KC9	337.092	1647884	338.099	338.099	-0.0679	338	C20H20OP2	12	20	20	0	1	2	0	0.05	1	0	0	0.5	-1.4	11.7
KC17	337.092	4112859	338.099	338.099	0.08	338	C20H20OP2	12	20	20	0	1	2	0	0.05	1	0	0	0.5	-1.4	9.1977
KC5	337.092	4532245	338.099	338.099	0.1983	338	C20H20OP2	12	20	20	0	1	2	0	0.05	1	0	0	0.5	-1.4	8.11065
KC15	337.093	5932000	338.1	338.1	0.1442	338	C16H18O8	8	16	18	0	8	0	0	0.5	1.125	0	0	0	-0.12	19.9616
KC3	337.093	6694745	338.1	338.1	0.44	338	C16H18O8	8	16	18	0	8	0	0	0.5	1.125	0	0	0	-0.12	21.2987
KC10	337.093	5442484	338.1	338.1	0.4992	338	C16H18O8	8	16	18	0	8	0	0	0.5	1.125	0	0	0	-0.12	3.95772
KC20	337.115	1576829	338.122	338.122	-0.4475	338	C24H19P	16	24	19	0	0	1	0	0	0.792	0	0	0.7	-1	7.70715
KC20	337.121	1921919	338.128	338.128	0.1345	338	C17H23O5P	7	17	23	0	5	1	0	0.294	1.353	0	0	0.1	-1.06	9.39386
KC9	337.128	1978647	338.135	338.135	0.0331	338	C14H14N10O	13	14	14	10	1	0	0	0.071	1	0.7143	0	0.7	1.29	14.0484
KC9	337.128	1978647	338.135	338.135	-0.3208	338	C21H24P2	11	21	24	0	0	2	0	0	1.143	0	0	0.5	-1.62	14.0484
KC18	337.128	5652891	338.135	338.135	-0.1433	338	C21H24P2	11	21	24	0	0	2	0	0	1.143	0	0	0.5	-1.62	34.0856
KC17	337.128	8004089	338.135	338.135	0.0341	338	C21H24P2	11	21	24	0	0	2	0	0	1.143	0	0	0.5	-1.62	17.8998
KC19	337.128	6764547	338.135	338.135	0.2707	338	C21H24P2	11	21	24	0	0	2	0	0	1.143	0	0	0.5	-1.62	19.1607
KC1	337.128	4930498	338.135	338.135	0.3594	338	C21H24P2	11	21	24	0	0	2	0	0	1.143	0	0	0.5	-1.62	22.6768
KC5	337.128	12552208	338.135	338.135	0.4186	338	C21H24P2	11	21	24	0	0	2	0	0	1.143	0	0	0.5	-1.62	22.4627
KC12	337.128	8423740	338.135	338.135	0.4777	338	C21H24P2	11	21	24	0	0	2	0	0	1.143	0	0	0.5	-1.62	16.8412
KC11	337.129	6360019	338.136	338.137	-0.2861	338	C17H22O7	7	17	22	0	7	0	0	0.412	1.294	0	0	0	-0.47	29.1793
KC7	337.129	6993082	338.137	338.137	-0.0495	338	C17H22O7	7	17	22	0	7	0	0	0.412	1.294	0	0	0	-0.47	15.4177
KC15	337.129	11830244	338.137	338.137	0.2758	338	C17H22O7	7	17	22	0	7	0	0	0.412	1.294	0	0	0	-0.47	39.8096
KC10	337.129	11385789	338.137	338.137	0.3054	338	C17H22O7	7	17	22	0	7	0	0	0.412	1.294	0	0	0	-0.47	8.27964
KC3	337.129	13703003	338.137	338.137	0.4237	338	C17H22O7	7	17	22	0	7	0	0	0.412	1.294	0	0	0	-0.47	43.5947
KC15	337.166	6110183	338.173	338.173	0.3777	338	C18H26O6	6	18	26	0	6	0	0	0.333	1.444	0	0	0	-0.78	20.5612
KC10	337.166	7248838	338.173	338.173	0.4073	338	C18H26O6	6	18	26	0	6	0	0	0.333	1.444	0	0	0	-0.78	5.27128
KC3	337.166	7841629	338.173	338.173	0.4665	338	C18H26O6	6	18	26	0	6	0	0	0.333	1.444	0	0	0	-0.78	24.9474
KC9	337.179	1663271	338.186	338.186	0.0609	338	C15H31O6P	1	15	31	0	6	1	0	0.4	2.067	0	0	-0.8	-1.6	11.8093
KC9	337.196	1559340	338.204	338.203	0.1936	338	C26H26	14	26	26	0	0	0	0	0	1	0	0	0.5	-1	11.0713
KC2	338.075	3847170	339.082	339.082	0.0974	339	C14H20N3OP3	8	14	20	3	1	3	0	0.071	1.429	0.2143	0	0.1	-1.71	10.7856
KC12	338.932	14529264	339.94	339.94	-0.3807	340	C19H3OP3	20	19	3	0	1	3	0	0.053	0.158	0	0	1.1	-0.84	29.0477
KC4	338.932	8873730	339.94	339.94	-0.3513	340	C19H3OP3	20	19	3	0	1	3	0	0.053	0.158	0	0	1.1	-0.84	20.5802
KC13	338.933	7126929	339.94	339.94	0.3547	340	C19H3OP3	20	19	3	0	1	3	0	0.053	0.158	0	0	1.1	-0.84	32.0497
KC3	338.933	5695420	339.941	339.941	-0.4933	340	C15HO8P	16	15	1	0	8	1	0	0.533	0.067	0	0	1.2	0.67	18.1194
KC16	338.934	23117008	339.941	339.941	-0.2579	340	C15HO8P	16	15	1	0	8	1	0	0.533	0.067	0	0	1.2	0.67	73.5964
KC14	338.934	44512700	339.941	339.941	0.0656	340	C15HO8P	16	15	1	0	8	1	0	0.533	0.067	0	0	1.2	0.67	100
KC20	338.945	1719765	339.953	339.953	0.4219	340	C16H8OP4	15	16	8	0	1	4	0	0.062	0.5	0	0	0.9	-1.62	8.40578
KC20	338.99	1683940	339.997	339.997	-0.0126	340	C17H11O2P3	14	17	11	0	2	3	0	0.118	0.647	0	0	0.8	-1.29	8.23068
KC20	339.024	1557488	340.031	340.031	0.2534	340	C28H4	27	28	4	0	0	0	0	0	0.143	0	0	1	-0.14	7.61261
KC9	339.037	1572704	340.044	340.044	0.497	340	C25H9P	22	25	9	0	0	1	0	0	0.36	0	0	0.9	-0.56	11.1662
KC20	339.064	1646077	340.071	340.071	-0.481	340	C15H17O7P	8	15	17	0	7	1	0	0.467	1.133	0	0	0	-0.53	8.04562
KC5	339.071	4126478	340.078	340.078	0.4778	340	C19H18O2P2	12	19	18	0	2	2	0	0.105	0.947	0	0	0.5	-1.26	7.38451
KC3	339.072	4581315	340.079	340.079	0.1006	340	C15H16O9	8	15	16	0	9	0	0	0.6	1.067	0	0	-0.2	0.13	14.575
KC2	339.079	4817614	340.086	340.086	-0.3226	340	C19H17O4P	12	19	17	0	4	1	0	0.211	0.895	0	0	0.5	-0.74	13.5062
KC1	339.107	4937263	340.114	340.115	-0.3029	340	C20H22OP2	11	20	22	0	1	2	0	0.05	1.1	0	0	0.5	-1.5	22.708
KC18	339.107	5018522	340.115	340.115	-0.1265	340	C20H22OP2	11	20	22	0	1	2	0	0.05	1.1	0	0	0.5	-1.5	30.2605
KC17	339.107	4106309	340.115	340.115	-0.0089	340	C20H22OP2	11	20	22	0	1	2	0	0.05	1.1	0	0	0.5	-1.5	9.18305
KC19	339.107	4597967	340.115	340.115	0.2263	340	C20H22OP2	11	20	22	0	1	2	0	0.05	1.1	0	0	0.5	-1.5	13.0238
KC5	339.107	9414409	340.115	340.115	0.2851	340	C20H22OP2	11	20	22	0	1	2	0	0.05	1.1	0	0	0.5	-1.5	16.8475
KC15	339.109	8266888	340.116	340.116	0.3196	340	C16H20O8	7	16	20	0	8	0	0	0.5	1.25	0	0	-0.1	-0.25	27.8186
KC3	339.109	9627588	340.116	340.116	0.3784	340	C16H20O8	7	16	20	0	8	0	0	0.5	1.25	0	0	-0.1	-0.25	30.6292
KC10	339.109	7708049	340.116	340.116	0.4078	340	C16H20O8	7	16	20	0	8	0	0	0.5	1.25	0	0	-0.1	-0.25	5.60522
KC1	339.144	5518943	340.151	340.151	-0.3191	340	C21H26P2	10	21	26	0	0	2	0	0	1.238	0	0	0.4	-1.71	25.3833
KC9	339.144	1913728	340.151	340.151	-0.2015	340	C21H26P2	10	21	26	0	0	2	0	0	1.238	0	0	0.4	-1.71	13.5875
KC18	339.144	5743523	340.151	340.151	-0.1721	340	C21H26P2	10	21	26	0	0	2	0	0	1.238	0	0	0.4	-1.71	34.6321
KC19	339.144	4528338	340.151	340.151	0.0925	340	C21H26P2	10	21	26	0	0	2	0	0	1.238	0	0	0.4	-1.71	12.8266
KC5	339.144	11151108	340.151	340.151	0.1807	340	C21H26P2	10	21	26	0	0	2	0	0	1.238	0	0	0.4	-1.71	19.9554
KC17	339.144	6254690	340.151	340.151	0.3865	340	C21H26P2	10	21	26	0	0	2	0	0	1.238	0	0	0.4	-1.71	13.9875
KC20	339.144	4059672	340.151	340.151	0.4747	340	C21H26P2	10	21	26	0	0	2	0	0	1.238	0	0	0.4	-1.71	19.8427
KC15	339.145	9872522	340.152	340.152	0.3328	340	C17H24O7	6	17	24	0	7	0	0	0.412	1.412	0	0	-0.1	-0.59	33.2217
KC3	339.145	10336198	340.152	340.152	0.3622	340	C17H24O7	6	17	24	0	7	0	0	0.412	1.412	0	0	-0.1	-0.59	32.8836
KC10	339.145	8580505	340.152	340.152	0.3916	340	C17H24O7	6	17	24	0	7	0	0	0.412	1.412	0	0	-0.1	-0.59	6.23966
KC6	340.09	3841787	341.098	341.098	-0.1965	341	C14H22N3OP3	7	14	22	3	1	3	0	0.071	1.571	0.2143	0	0	-1.86	5.38073
KC20	340.111	1845597	341.119	341.119	-0.3999	341	C11H26N3O3P3	2	11	26	3	3	3	0	0.273	2.364	0.2727	0	-3.5	-2.36	9.02082
KC6	340.111	13197079	341.119	341.119	0.0105	341	C11H26N3O3P3	2	11	26	3	3	3	0	0.273	2.364	0.2727	0	-3.5	-2.36	18.4835
KC2	340.112	7301531	341.119	341.119	0.2451	341	C11H26N3O3P3	2	11	26	3	3	3	0	0.273	2.364	0.2727	0	-3.5	-2.36	20.4699
KC9	340.988	1564595	341.995	341.995	0.1689	342	C23H2O4	23	23	2	0	4	0	0	0.174	0.087	0	0	1	0.26	11.1087
KC20	341.066	1588387	342.073	342.073	0.161	342	C12H15N4O6P	8	12	15	4	6	1	0	0.5	1.25	0.3333	0	-3	0.33	7.76364
KC5	341.087	4429324	342.094	342.094	0.4748	342	C19H20O2P2	11	19	20	0	2	2	0	0.105	1.053	0	0	0.5	-1.37	7.92647
KC10	341.088	4528961	342.095	342.095	0.2752	342	C15H18O9	7	15	18	0	9	0	0	0.6	1.2	0	0	-0.3	0	3.29342
KC15	341.088	3896572	342.095	342.095	0.4798	342	C15H18O9	7	15	18	0	9	0	0	0.6	1.2	0	0	-0.3	0	13.1122
KC2	341.095	6033380	342.102	342.102	-0.1748	342	C19H19O4P	11	19	19	0	4	1	0	0.211	1	0	0	0.4	-0.84	16.9147
KC15	341.103	3921149	342.11	342.11	0.4326	342	C19H18O6	11	19	18	0	6	0	0	0.316	0.947	0	0	0.4	-0.32	13.1949
KC1	341.108	4100109	342.115	342.115	-0.488	342	C16H24O4P2	6	16	24	0	4	2	0	0.25	1.5	0	0	0	-1.62	18.8576
KC17	341.108	4410911	342.115	342.115	0.0381	342	C16H24O4P2	6	16	24	0	4	2	0	0.25	1.5	0	0	0	-1.62	9.86424
KC19	341.108	5040507	342.115	342.115	0.3012	342	C16H24O4P2	6	16	24	0	4	2	0	0.25	1.5	0	0	0	-1.62	14.2773
KC5	341.108	4912650	342.115	342.115	0.3889	342	C16H24O4P2	6	16	24	0	4	2	0	0.25	1.5	0	0	0	-1.62	8.7914
KC9	341.108	2112984	342.116	342.116	-0.2402	342	C25H14N2	20	25	14	2	0	0	0	0	0.56	0.08	0	0.8	-0.32	15.0022
KC11	341.109	3991464	342.116	342.116	-0.3076	342	C12H22O11	2	12	22	0	11	0	0	0.917	1.833	0	0	-9	0	18.3125
KC16	341.109	4693924	342.116	342.116	0.2186	342	C12H22O11	2	12	22	0	11	0	0	0.917	1.833	0	0	-9	0	14.9438
KC1	341.123	5701663	342.13	342.13	-0.4182	342	C20H24OP2	10	20	24	0	1	2	0	0.05	1.2	0	0	0.4	-1.6	26.2237
KC18	341.123	5604773	342.13	342.13	-0.2136	342	C20H24OP2	10	20	24	0	1	2	0	0.05	1.2	0	0	0.4	-1.6	33.7954
KC17	341.123	6352426	342.13	342.13	0.1079	342	C20H24OP2	10	20	24	0	1	2	0	0.05	1.2	0	0	0.4	-1.6	14.2061
KC19	341.123	4581756	342.13	342.13	0.1079	342	C20H24OP2	10	20	24	0	1	2	0	0.05	1.2	0	0	0.4	-1.6	12.9779
KC5	341.123	8697351	342.13	342.13	0.4002	342	C20H24OP2	10	20	24	0	1	2	0	0.05	1.2	0	0	0.4	-1.6	15.5643
KC4	341.123	6557641	342.13	342.13	0.4879	342	C20H24OP2	10	20	24	0	1	2	0	0.05	1.2	0	0	0.4	-1.6	15.2087
KC15	341.124	7046398	342.132	342.131	0.1714	342	C16H22O8	6	16	22	0	8	0	0	0.5	1.375	0	0	-0.2	-0.38	23.7116
KC10	341.124	8060744	342.132	342.131	0.4052	342	C16H22O8	6	16	22	0	8	0	0	0.5	1.375	0	0	-0.2	-0.38	5.86169
KC3	341.124	8382479	342.132	342.131	0.4929	342	C16H22O8	6	16	22	0	8	0	0	0.5	1.375	0	0	-0.2	-0.38	26.668
KC5	341.159	6823427	342.167	342.167	0.2379	342	C21H28P2	9	21	28	0	0	2	0	0	1.333	0	0	0.4	-1.81	12.2108
KC17	341.159	4800067	342.167	342.167	0.2379	342	C21H28P2	9	21	28	0	0	2	0	0	1.333	0	0	0.4	-1.81	10.7345
KC15	341.161	4498687	342.168	342.168	0.0384	342	C17H26O7	5	17	26	0	7	0	0	0.412	1.529	0	0	-0.2	-0.71	15.1384
KC10	341.161	6365008	342.168	342.168	0.3891	342	C17H26O7	5	17	26	0	7	0	0	0.412	1.529	0	0	-0.2	-0.71	4.62857
KC3	341.161	6547472	342.168	342.168	0.4475	342	C17H26O7	5	17	26	0	7	0	0	0.412	1.529	0	0	-0.2	-0.71	20.8301
KC9	341.172	1544683	342.18	342.18	0.3046	342	C18H33P3	4	18	33	0	0	3	0	0	1.833	0	0	0.1	-2.67	10.9673
KC9	342.933	1591298	343.94	343.94	-0.4863	344	C11H7O7P3	10	11	7	0	7	3	0	0.636	0.636	0	0	0	-0.73	11.2982
KC22	343.025	3868646	344.032	344.032	-0.2955	344	C20H8O6	17	20	8	0	6	0	0	0.3	0.4	0	0	0.8	0.2	22.0731
KC20	343.032	1809232	344.039	344.039	-0.2198	344	C24H9OP	21	24	9	0	1	1	0	0.042	0.375	0	0	0.9	-0.5	8.84308
KC9	343.038	1709089	344.045	344.045	-0.3163	344	C17H13O6P	12	17	13	0	6	1	0	0.353	0.765	0	0	0.5	-0.35	12.1346
KC6	343.074	4324929	344.081	344.081	-0.4195	344	C18H17O5P	11	18	17	0	5	1	0	0.278	0.944	0	0	0.4	-0.67	6.0574
KC6	343.081	4345418	344.088	344.088	0.005	344	C22H18P2	15	22	18	0	0	2	0	0	0.818	0	0	0.6	-1.27	6.0861
KC11	343.082	4132018	344.09	344.09	0.01	344	C18H16O7	11	18	16	0	7	0	0	0.389	0.889	0	0	0.4	-0.11	18.9574
KC3	343.082	4810800	344.09	344.09	0.3006	344	C18H16O7	11	18	16	0	7	0	0	0.389	0.889	0	0	0.4	-0.11	15.3051
KC5	343.102	5666065	344.11	344.11	0.3556	344	C19H22O2P2	10	19	22	0	2	2	0	0.105	1.158	0	0	0.4	-1.47	10.1397
KC10	343.104	4270279	344.111	344.111	0.2153	344	C15H20O9	6	15	20	0	9	0	0	0.6	1.333	0	0	-0.5	-0.13	3.10531
KC3	343.104	4782128	344.111	344.111	0.2443	344	C15H20O9	6	15	20	0	9	0	0	0.6	1.333	0	0	-0.5	-0.13	15.2139
KC2	343.11	4680738	344.118	344.118	-0.2321	344	C19H21O4P	10	19	21	0	4	1	0	0.211	1.105	0	0	0.4	-0.95	13.1225
KC15	343.119	4990263	344.126	344.126	0.1974	344	C19H20O6	10	19	20	0	6	0	0	0.316	1.053	0	0	0.3	-0.42	16.7926
KC3	343.119	5285936	344.126	344.126	0.459	344	C19H20O6	10	19	20	0	6	0	0	0.316	1.053	0	0	0.3	-0.42	16.8167
KC5	343.139	6968588	344.146	344.146	0.1071	344	C20H26OP2	9	20	26	0	1	2	0	0.05	1.3	0	0	0.4	-1.7	12.4706
KC17	343.139	4429680	344.146	344.146	0.1071	344	C20H26OP2	9	20	26	0	1	2	0	0.05	1.3	0	0	0.4	-1.7	9.90621
KC15	343.14	4056375	344.147	344.147	0.2864	344	C16H24O8	5	16	24	0	8	0	0	0.5	1.5	0	0	-0.4	-0.5	13.65
KC10	343.14	6717645	344.147	344.147	0.4317	344	C16H24O8	5	16	24	0	8	0	0	0.5	1.5	0	0	-0.4	-0.5	4.88501
KC3	343.14	4737072	344.147	344.147	0.4317	344	C16H24O8	5	16	24	0	8	0	0	0.5	1.5	0	0	-0.4	-0.5	15.0705
KC9	343.14	1600064	344.147	344.147	-0.1955	344	C11H21N8O3P	6	11	21	8	3	1	0	0.273	1.909	0.7273	0	6	0.36	11.3605
KC15	343.155	5989687	344.162	344.162	0.2686	344	C20H24O5	9	20	24	0	5	0	0	0.25	1.2	0	0	0.3	-0.7	20.1557
KC14	343.155	3840205	344.163	344.162	0.4429	344	C20H24O5	9	20	24	0	5	0	0	0.25	1.2	0	0	0.3	-0.7	8.62721
KC3	343.155	4028464	344.163	344.162	0.4429	344	C20H24O5	9	20	24	0	5	0	0	0.25	1.2	0	0	0.3	-0.7	12.8162
KC9	343.175	1544267	344.182	344.182	-0.2867	344	C21H30P2	8	21	30	0	0	2	0	0	1.429	0	0	0.3	-1.9	10.9643
KC4	343.249	3946634	344.256	344.256	0.3545	344	C19H36O5	2	19	36	0	5	0	0	0.263	1.895	0	0	-0.2	-1.37	9.15316
KC20	343.277	1631655	344.284	344.284	-0.1489	344	C20H41O2P	1	20	41	0	2	1	0	0.1	2.05	0	0	-0.1	-2.1	7.97512
KC6	344.085	4092700	345.092	345.092	-0.1787	345	C13H22N3O2P3	6	13	22	3	2	3	0	0.154	1.692	0.2308	0	-0.4	-1.85	5.73215
KC6	344.122	5452616	345.129	345.129	0.0372	345	C14H26N3OP3	5	14	26	3	1	3	0	0.071	1.857	0.2143	0	-0.3	-2.14	7.63682
KC2	344.122	4452844	345.129	345.129	0.24	345	C14H26N3OP3	5	14	26	3	1	3	0	0.071	1.857	0.2143	0	-0.3	-2.14	12.4836
KC6	344.158	5534580	345.165	345.165	-0.0657	345	C15H30N3P3	4	15	30	3	0	3	0	0	2	0.2	0	-0.2	-2.4	7.75162
KC20	344.936	1675259	345.943	345.943	-0.1161	346	C14H4O7P2	14	14	4	0	7	2	0	0.5	0.286	0	0	1	0	8.18825
KC20	345.038	1856032	346.045	346.045	0.3099	346	C13H15O9P	7	13	15	0	9	1	0	0.692	1.154	0	0	-1	-0.15	9.07182
KC2	345.09	7989050	346.097	346.097	-0.2439	346	C18H19O5P	10	18	19	0	5	1	0	0.278	1.056	0	0	0.3	-0.78	22.3974
KC9	345.097	1579661	346.104	346.104	-0.2552	346	C22H20P2	14	22	20	0	0	2	0	0	0.909	0	0	0.6	-1.36	11.2156
KC12	345.097	4194530	346.104	346.104	0.3226	346	C22H20P2	14	22	20	0	0	2	0	0	0.909	0	0	0.6	-1.36	8.38593
KC5	345.097	4080665	346.104	346.104	0.3804	346	C22H20P2	14	22	20	0	0	2	0	0	0.909	0	0	0.6	-1.36	7.30253
KC15	345.098	4384044	346.105	346.105	0.2698	346	C18H18O7	10	18	18	0	7	0	0	0.389	1	0	0	0.3	-0.22	14.7526
KC16	345.098	4609111	346.105	346.105	0.4432	346	C18H18O7	10	18	18	0	7	0	0	0.389	1	0	0	0.3	-0.22	14.6738
KC5	345.118	3986454	346.125	346.125	0.1222	346	C19H24O2P2	9	19	24	0	2	2	0	0.105	1.263	0	0	0.3	-1.58	7.13394
KC15	345.135	6485291	346.142	346.142	0.4272	346	C19H22O6	9	19	22	0	6	0	0	0.316	1.158	0	0	0.2	-0.53	21.8234
KC3	345.135	5730335	346.142	346.142	0.4272	346	C19H22O6	9	19	22	0	6	0	0	0.316	1.158	0	0	0.2	-0.53	18.2305
KC10	345.135	4477459	346.142	346.142	0.4561	346	C19H22O6	9	19	22	0	6	0	0	0.316	1.158	0	0	0.2	-0.53	3.25596
KC9	345.154	1732254	346.161	346.161	0.1053	346	C13H18N10O2	10	13	18	10	2	0	0	0.154	1.385	0.7692	0	-2	1.23	12.299
KC9	345.154	1732254	346.161	346.162	-0.2404	346	C20H28OP2	8	20	28	0	1	2	0	0.05	1.4	0	0	0.3	-1.8	12.299
KC10	345.156	4043286	346.163	346.163	0.3712	346	C16H26O8	4	16	26	0	8	0	0	0.5	1.625	0	0	-0.5	-0.62	2.94024
KC15	345.171	4461866	346.178	346.178	0.2957	346	C20H26O5	8	20	26	0	5	0	0	0.25	1.3	0	0	0.2	-0.8	15.0145
KC3	345.171	6096926	346.178	346.178	0.4979	346	C20H26O5	8	20	26	0	5	0	0	0.25	1.3	0	0	0.2	-0.8	19.3968
KC9	345.256	1830077	346.264	346.264	-0.2478	346	C19H39O3P	1	19	39	0	3	1	0	0.158	2.053	0	0	-0.2	-2	12.9936
KC9	346.952	1748149	347.959	347.959	0.373	348	C14H6O7P2	13	14	6	0	7	2	0	0.5	0.429	0	0	0.8	-0.14	12.4119
KC20	346.964	1796327	347.972	347.972	-0.1362	348	C11H11O7P3	8	11	11	0	7	3	0	0.636	1	0	0	-2	-1.09	8.78
KC20	347.037	1921282	348.044	348.045	-0.1103	348	C13H19O5P3	6	13	19	0	5	3	0	0.385	1.462	0	0	-0.4	-1.85	9.39075
KC9	347.062	1675989	348.069	348.069	-0.3305	348	C13H16O11	6	13	16	0	11	0	0	0.846	1.231	0	0	-2.5	0.46	11.8996
KC3	347.077	4696022	348.085	348.085	0.485	348	C17H16O8	10	17	16	0	8	0	0	0.471	0.941	0	0	0.2	0	14.9399
KC20	347.084	1563411	348.092	348.092	-0.0721	348	C21H17O3P	14	21	17	0	3	1	0	0.143	0.81	0	0	0.6	-0.76	7.64156
KC9	347.087	1636572	348.094	348.094	-0.1554	348	C28H12	23	28	12	0	0	0	0	0	0.429	0	0	0.8	-0.43	11.6197
KC19	347.112	3889751	348.12	348.12	0.1195	348	C22H22P2	13	22	22	0	0	2	0	0	1	0	0	0.6	-1.45	11.0178
KC5	347.112	7131931	348.12	348.12	0.2631	348	C22H22P2	13	22	22	0	0	2	0	0	1	0	0	0.6	-1.45	12.7629
KC4	347.113	4245974	348.12	348.12	0.4929	348	C22H22P2	13	22	22	0	0	2	0	0	1	0	0	0.6	-1.45	9.8474
KC11	347.114	3822807	348.121	348.121	-0.3352	348	C18H20O7	9	18	20	0	7	0	0	0.389	1.111	0	0	0.2	-0.33	17.5388
KC15	347.114	8418513	348.121	348.121	0.383	348	C18H20O7	9	18	20	0	7	0	0	0.389	1.111	0	0	0.2	-0.33	28.3289
KC10	347.114	5915409	348.121	348.121	0.383	348	C18H20O7	9	18	20	0	7	0	0	0.389	1.111	0	0	0.2	-0.33	4.30163
KC11	347.15	4072678	348.157	348.157	-0.1499	348	C19H24O6	8	19	24	0	6	0	0	0.316	1.263	0	0	0.2	-0.63	18.6851
KC15	347.15	7996623	348.157	348.157	0.3958	348	C19H24O6	8	19	24	0	6	0	0	0.316	1.263	0	0	0.2	-0.63	26.9092
KC3	347.15	9467858	348.157	348.157	0.4245	348	C19H24O6	8	19	24	0	6	0	0	0.316	1.263	0	0	0.2	-0.63	30.121
KC10	347.186	3965721	348.194	348.194	0.1789	348	C20H28O5	7	20	28	0	5	0	0	0.25	1.4	0	0	0.1	-0.9	2.88383
KC15	347.187	6823116	348.194	348.194	0.3225	348	C20H28O5	7	20	28	0	5	0	0	0.25	1.4	0	0	0.1	-0.9	22.9602
KC3	347.187	5019600	348.194	348.194	0.4661	348	C20H28O5	7	20	28	0	5	0	0	0.25	1.4	0	0	0.1	-0.9	15.9694
KC20	347.202	1648959	348.209	348.209	-0.1259	348	C24H28O2	11	24	28	0	2	0	0	0.083	1.167	0	0	0.4	-1	8.0597
KC21	348.967	1828829	349.974	349.975	-0.458	350	C14H8O7P2	12	14	8	0	7	2	0	0.5	0.571	0	0	0.6	-0.29	8.93886
KC21	348.97	1802206	349.977	349.977	-0.1408	350	C21H3O4P	21	21	3	0	4	1	0	0.19	0.143	0	0	1	0	8.80874
KC9	349.092	1674023	350.099	350.099	-0.3512	350	C21H20OP2	13	21	20	0	1	2	0	0.048	0.952	0	0	0.6	-1.33	11.8856
KC1	349.092	3868279	350.099	350.099	-0.0941	350	C21H20OP2	13	21	20	0	1	2	0	0.048	0.952	0	0	0.6	-1.33	17.7914
KC5	349.092	6824473	350.099	350.099	0.1915	350	C21H20OP2	13	21	20	0	1	2	0	0.048	0.952	0	0	0.6	-1.33	12.2127
KC4	349.092	4008554	350.099	350.099	0.3057	350	C21H20OP2	13	21	20	0	1	2	0	0.048	0.952	0	0	0.6	-1.33	9.29677
KC15	349.093	5874721	350.1	350.1	0.2535	350	C17H18O8	9	17	18	0	8	0	0	0.471	1.059	0	0	0.1	-0.12	19.7688
KC10	349.093	5641152	350.1	350.1	0.3392	350	C17H18O8	9	17	18	0	8	0	0	0.471	1.059	0	0	0.1	-0.12	4.10219
KC3	349.093	7259977	350.1	350.1	0.3964	350	C17H18O8	9	17	18	0	8	0	0	0.471	1.059	0	0	0.1	-0.12	23.0969
KC1	349.128	6495888	350.135	350.135	-0.4526	350	C22H24P2	12	22	24	0	0	2	0	0	1.091	0	0	0.5	-1.55	29.8765
KC9	349.128	2343730	350.135	350.135	-0.4526	350	C22H24P2	12	22	24	0	0	2	0	0	1.091	0	0	0.5	-1.55	16.6405
KC18	349.128	6421818	350.135	350.135	-0.3098	350	C22H24P2	12	22	24	0	0	2	0	0	1.091	0	0	0.5	-1.55	38.722
KC17	349.128	6434456	350.135	350.135	0.1186	350	C22H24P2	12	22	24	0	0	2	0	0	1.091	0	0	0.5	-1.55	14.3895
KC19	349.128	5687838	350.135	350.135	0.1757	350	C22H24P2	12	22	24	0	0	2	0	0	1.091	0	0	0.5	-1.55	16.1109
KC5	349.128	11280916	350.135	350.135	0.2329	350	C22H24P2	12	22	24	0	0	2	0	0	1.091	0	0	0.5	-1.55	20.1877
KC4	349.128	7580269	350.135	350.135	0.3185	350	C22H24P2	12	22	24	0	0	2	0	0	1.091	0	0	0.5	-1.55	17.5804
KC15	349.129	11314205	350.137	350.137	0.4091	350	C18H22O7	8	18	22	0	7	0	0	0.389	1.222	0	0	0.1	-0.44	38.0731
KC3	349.129	13698885	350.137	350.137	0.4948	350	C18H22O7	8	18	22	0	7	0	0	0.389	1.222	0	0	0.1	-0.44	43.5816
KC6	349.154	4196512	350.161	350.161	-0.4363	350	C16H34P4	2	16	34	0	0	4	0	0	2.125	0	0	-0.2	-3.38	5.87755
KC11	349.166	3991474	350.173	350.173	0.3362	350	C19H26O6	7	19	26	0	6	0	0	0.316	1.368	0	0	0.1	-0.74	18.3126
KC15	349.166	10822680	350.173	350.173	0.3934	350	C19H26O6	7	19	26	0	6	0	0	0.316	1.368	0	0	0.1	-0.74	36.419
KC10	349.166	9847749	350.173	350.173	0.3934	350	C19H26O6	7	19	26	0	6	0	0	0.316	1.368	0	0	0.1	-0.74	7.16119
KC9	349.173	1582399	350.18	350.18	0.4392	350	C23H27OP	11	23	27	0	1	1	0	0.043	1.174	0	0	0.4	-1.3	11.2351
KC15	349.202	4011028	350.209	350.209	0.3776	350	C20H30O5	6	20	30	0	5	0	0	0.25	1.5	0	0	0.1	-1	13.4974
KC3	349.202	4235071	350.209	350.209	0.4633	350	C20H30O5	6	20	30	0	5	0	0	0.25	1.5	0	0	0.1	-1	13.4735
KC4	349.384	3996286	350.391	350.391	0.3559	350	C25H50	1	25	50	0	0	0	0	0	2	0	0	0	-2	9.26831
KC21	350.991	2370287	351.998	351.998	-0.3198	352	C14H9O9P	11	14	9	0	9	1	0	0.643	0.643	0	0	0.2	0.29	11.5854
KC21	351.022	1706747	352.029	352.029	-0.2694	352	C22H9O3P	19	22	9	0	3	1	0	0.136	0.409	0	0	0.8	-0.36	8.34216
KC21	351.071	1664782	352.078	352.078	-0.277	352	C20H18O2P2	13	20	18	0	2	2	0	0.1	0.9	0	0	0.6	-1.2	8.13704
KC5	351.071	3879181	352.078	352.078	0.0355	352	C20H18O2P2	13	20	18	0	2	2	0	0.1	0.9	0	0	0.6	-1.2	6.94197
KC21	351.106	1607452	352.114	352.114	-0.0041	352	C15H23N4P3	8	15	23	4	0	3	0	0	1.533	0.2667	0	0.1	-1.73	7.85683
KC18	351.107	4355795	352.114	352.115	-0.3778	352	C21H22OP2	12	21	22	0	1	2	0	0.048	1.048	0	0	0.5	-1.43	26.2644
KC1	351.107	5010266	352.115	352.115	-0.1222	352	C21H22OP2	12	21	22	0	1	2	0	0.048	1.048	0	0	0.5	-1.43	23.0437
KC19	351.107	5560730	352.115	352.115	0.1618	352	C21H22OP2	12	21	22	0	1	2	0	0.048	1.048	0	0	0.5	-1.43	15.7508
KC5	351.107	9535752	352.115	352.115	0.1902	352	C21H22OP2	12	21	22	0	1	2	0	0.048	1.048	0	0	0.5	-1.43	17.0646
KC11	351.108	4176260	352.116	352.116	-0.1173	352	C17H20O8	8	17	20	0	8	0	0	0.471	1.176	0	0	0	-0.24	19.1604
KC15	351.109	7963407	352.116	352.116	0.2803	352	C17H20O8	8	17	20	0	8	0	0	0.471	1.176	0	0	0	-0.24	26.7974
KC10	351.109	8201243	352.116	352.116	0.4223	352	C17H20O8	8	17	20	0	8	0	0	0.471	1.176	0	0	0	-0.24	5.96386
KC22	351.133	16967528	352.14	352.14	-0.2196	352	C15H32OP4	2	15	32	0	1	4	0	0.067	2.133	0	0	-0.3	-3.33	96.8107
KC1	351.133	21742440	352.14	352.14	-0.1344	352	C15H32OP4	2	15	32	0	1	4	0	0.067	2.133	0	0	-0.3	-3.33	100
KC9	351.133	14084466	352.14	352.14	-0.0493	352	C15H32OP4	2	15	32	0	1	4	0	0.067	2.133	0	0	-0.3	-3.33	100
KC18	351.133	16584408	352.14	352.14	0.0075	352	C15H32OP4	2	15	32	0	1	4	0	0.067	2.133	0	0	-0.3	-3.33	100
KC17	351.133	44716176	352.14	352.14	0.3767	352	C15H32OP4	2	15	32	0	1	4	0	0.067	2.133	0	0	-0.3	-3.33	100
KC21	351.134	20459304	352.141	352.141	-0.3103	352	C14H21N6O3P	8	14	21	6	3	1	0	0.214	1.5	0.4286	0	-0.5	-0.14	100
KC1	351.144	5546861	352.151	352.151	-0.4502	352	C22H26P2	11	22	26	0	0	2	0	0	1.182	0	0	0.4	-1.64	25.5117
KC9	351.144	3271029	352.151	352.151	-0.4218	352	C22H26P2	11	22	26	0	0	2	0	0	1.182	0	0	0.4	-1.64	23.2244
KC18	351.144	6287066	352.151	352.151	-0.3366	352	C22H26P2	11	22	26	0	0	2	0	0	1.182	0	0	0.4	-1.64	37.9095
KC21	351.144	3505963	352.151	352.151	-0.223	352	C22H26P2	11	22	26	0	0	2	0	0	1.182	0	0	0.4	-1.64	17.1363
KC5	351.144	17350914	352.151	352.151	0.1177	352	C22H26P2	11	22	26	0	0	2	0	0	1.182	0	0	0.4	-1.64	31.0502
KC17	351.144	8773778	352.151	352.151	0.1177	352	C22H26P2	11	22	26	0	0	2	0	0	1.182	0	0	0.4	-1.64	19.621
KC19	351.144	6805911	352.151	352.151	0.3165	352	C22H26P2	11	22	26	0	0	2	0	0	1.182	0	0	0.4	-1.64	19.2778
KC4	351.144	10160879	352.151	352.151	0.4585	352	C22H26P2	11	22	26	0	0	2	0	0	1.182	0	0	0.4	-1.64	23.5654
KC12	351.144	9799618	352.151	352.151	0.4585	352	C22H26P2	11	22	26	0	0	2	0	0	1.182	0	0	0.4	-1.64	19.5919
KC11	351.145	5396875	352.152	352.152	-0.1897	352	C18H24O7	7	18	24	0	7	0	0	0.389	1.333	0	0	0	-0.56	24.7605
KC15	351.145	13157129	352.152	352.152	0.3782	352	C18H24O7	7	18	24	0	7	0	0	0.389	1.333	0	0	0	-0.56	44.2746
KC10	351.145	10593308	352.152	352.152	0.4634	352	C18H24O7	7	18	24	0	7	0	0	0.389	1.333	0	0	0	-0.56	7.70335
KC3	351.145	13592175	352.152	352.152	0.4918	352	C18H24O7	7	18	24	0	7	0	0	0.389	1.333	0	0	0	-0.56	43.2421
KC15	351.181	7545604	352.189	352.189	0.4193	352	C19H28O6	6	19	28	0	6	0	0	0.316	1.474	0	0	0	-0.84	25.3915
KC10	351.181	6186013	352.189	352.189	0.4193	352	C19H28O6	6	19	28	0	6	0	0	0.316	1.474	0	0	0	-0.84	4.49841
KC16	352.949	7068340	353.957	353.957	-0.1067	354	C16H3O8P	16	16	3	0	8	1	0	0.5	0.188	0	0	1	0.5	22.5031
KC14	352.949	15531447	353.957	353.957	0.0911	354	C16H3O8P	16	16	3	0	8	1	0	0.5	0.188	0	0	1	0.5	34.8922
KC9	353.001	1577858	354.008	354.008	-0.196	354	C21H7O4P	19	21	7	0	4	1	0	0.19	0.333	0	0	0.9	-0.19	11.2028
KC21	353.048	1604129	354.055	354.055	-0.0087	354	C12H21O6P3	4	12	21	0	6	3	0	0.5	1.75	0	0	-1.7	-2	7.84058
KC9	353.048	1689999	354.055	354.055	0.2172	354	C12H21O6P3	4	12	21	0	6	3	0	0.5	1.75	0	0	-1.7	-2	11.999
KC6	353.058	4449720	354.066	354.066	-0.4922	354	C19H15O5P	13	19	15	0	5	1	0	0.263	0.789	0	0	0.5	-0.53	6.23218
KC2	353.058	4237468	354.066	354.066	-0.464	354	C19H15O5P	13	19	15	0	5	1	0	0.263	0.789	0	0	0.5	-0.53	11.8798
KC4	353.063	4016987	354.07	354.07	0.0587	354	C16H21O3P3	8	16	21	0	3	3	0	0.188	1.312	0	0	0.2	-1.88	9.31633
KC5	353.065	3989494	354.073	354.073	-0.1362	354	C23H16P2	17	23	16	0	0	2	0	0	0.696	0	0	0.7	-1.13	7.13938
KC4	353.066	4680539	354.073	354.073	0.2592	354	C23H16P2	17	23	16	0	0	2	0	0	0.696	0	0	0.7	-1.13	10.8553
KC5	353.087	5988339	354.094	354.094	0.3175	354	C20H20O2P2	12	20	20	0	2	2	0	0.1	1	0	0	0.5	-1.3	10.7164
KC21	353.087	1603120	354.094	354.094	0.3457	354	C20H20O2P2	12	20	20	0	2	2	0	0.1	1	0	0	0.5	-1.3	7.83565
KC12	353.087	3954061	354.094	354.094	0.4304	354	C20H20O2P2	12	20	20	0	2	2	0	0.1	1	0	0	0.5	-1.3	7.90517
KC4	353.087	4008796	354.094	354.094	0.4587	354	C20H20O2P2	12	20	20	0	2	2	0	0.1	1	0	0	0.5	-1.3	9.29733
KC10	353.088	5559332	354.095	354.095	0.2376	354	C16H18O9	8	16	18	0	9	0	0	0.562	1.125	0	0	-0.1	0	4.04269
KC9	353.121	1776036	354.128	354.128	0.3837	354	C14H29O4P3	2	14	29	0	4	3	0	0.286	2.071	0	0	-0.7	-2.57	12.6099
KC18	353.123	6705233	354.13	354.13	-0.3476	354	C21H24OP2	11	21	24	0	1	2	0	0.048	1.143	0	0	0.4	-1.52	40.4309
KC17	353.123	5798310	354.13	354.13	-0.1782	354	C21H24OP2	11	21	24	0	1	2	0	0.048	1.143	0	0	0.4	-1.52	12.9669
KC19	353.123	5245133	354.13	354.13	0.0478	354	C21H24OP2	11	21	24	0	1	2	0	0.048	1.143	0	0	0.4	-1.52	14.8569
KC5	353.123	14753773	354.13	354.13	0.1325	354	C21H24OP2	11	21	24	0	1	2	0	0.048	1.143	0	0	0.4	-1.52	26.4025
KC4	353.123	6716254	354.13	354.13	0.3866	354	C21H24OP2	11	21	24	0	1	2	0	0.048	1.143	0	0	0.4	-1.52	15.5766
KC12	353.123	8236456	354.13	354.13	0.4713	354	C21H24OP2	11	21	24	0	1	2	0	0.048	1.143	0	0	0.4	-1.52	16.4668
KC11	353.124	3836556	354.131	354.131	-0.258	354	C17H22O8	7	17	22	0	8	0	0	0.471	1.294	0	0	-0.1	-0.35	17.6018
KC21	353.124	1985087	354.131	354.131	0.0244	354	C17H22O8	7	17	22	0	8	0	0	0.471	1.294	0	0	-0.1	-0.35	9.70261
KC15	353.124	9896357	354.132	354.131	0.3632	354	C17H22O8	7	17	22	0	8	0	0	0.471	1.294	0	0	-0.1	-0.35	33.3019
KC10	353.124	10462243	354.132	354.131	0.3915	354	C17H22O8	7	17	22	0	8	0	0	0.471	1.294	0	0	-0.1	-0.35	7.60804
KC2	353.131	23066836	354.138	354.138	-0.382	354	C21H23O3P	11	21	23	0	3	1	0	0.143	1.095	0	0	0.4	-1.05	64.6682
KC9	353.159	1884078	354.166	354.167	-0.4478	354	C22H28P2	10	22	28	0	0	2	0	0	1.273	0	0	0.4	-1.73	13.377
KC18	353.159	4730967	354.166	354.167	-0.3631	354	C22H28P2	10	22	28	0	0	2	0	0	1.273	0	0	0.4	-1.73	28.5266
KC17	353.159	8516009	354.167	354.167	-0.1372	354	C22H28P2	10	22	28	0	0	2	0	0	1.273	0	0	0.4	-1.73	19.0446
KC5	353.159	14565352	354.167	354.167	0.1169	354	C22H28P2	10	22	28	0	0	2	0	0	1.273	0	0	0.4	-1.73	26.0653
KC19	353.159	4901064	354.167	354.167	0.1734	354	C22H28P2	10	22	28	0	0	2	0	0	1.273	0	0	0.4	-1.73	13.8823
KC4	353.159	8653664	354.167	354.167	0.3992	354	C22H28P2	10	22	28	0	0	2	0	0	1.273	0	0	0.4	-1.73	20.0699
KC12	353.159	7056834	354.167	354.167	0.4275	354	C22H28P2	10	22	28	0	0	2	0	0	1.273	0	0	0.4	-1.73	14.1084
KC10	353.161	10036259	354.168	354.168	0.2912	354	C18H26O7	6	18	26	0	7	0	0	0.389	1.444	0	0	-0.1	-0.67	7.29827
KC15	353.161	8085918	354.168	354.168	0.4041	354	C18H26O7	6	18	26	0	7	0	0	0.389	1.444	0	0	-0.1	-0.67	27.2097
KC15	353.197	5935511	354.204	354.204	0.3321	354	C19H30O6	5	19	30	0	6	0	0	0.316	1.579	0	0	-0.1	-0.95	19.9734
KC3	353.197	4482385	354.204	354.204	0.445	354	C19H30O6	5	19	30	0	6	0	0	0.316	1.579	0	0	-0.1	-0.95	14.2603
KC9	353.212	1684413	354.219	354.219	-0.2781	354	C23H30O3	9	23	30	0	3	0	0	0.13	1.304	0	0	0.3	-1.04	11.9594
KC9	353.218	1600959	354.225	354.225	-0.4002	354	C16H34O8	0	16	34	0	8	0	0	0.5	2.125	0	0	-1	-1.12	11.3668
KC6	354.07	3901604	355.077	355.077	0.4461	355	C14H20N3O2P3	8	14	20	3	2	3	0	0.143	1.429	0.2143	0	0	-1.57	5.4645
KC21	354.927	2192667	355.934	355.935	-0.4328	356	C19H3O2P3	20	19	3	0	2	3	0	0.105	0.158	0	0	1.1	-0.74	10.7172
KC9	354.936	1659804	355.943	355.943	0.2072	356	C19H2O4P2	20	19	2	0	4	2	0	0.211	0.105	0	0	1.1	-0.21	11.7846
KC11	354.964	3857094	355.971	355.971	-0.3077	356	C20H7OP3	19	20	7	0	1	3	0	0.05	0.35	0	0	0.9	-1	17.6961
KC9	355.051	1790396	356.058	356.058	-0.0449	356	C15H18O6P2	8	15	18	0	6	2	0	0.4	1.2	0	0	0	-1.07	12.7118
KC5	355.055	3899097	356.063	356.063	-0.1515	356	C29H8	26	29	8	0	0	0	0	0	0.276	0	0	0.9	-0.28	6.97761
KC9	355.067	1630144	356.074	356.074	-0.1977	356	C15H16O10	8	15	16	0	10	0	0	0.667	1.067	0	0	-0.4	0.27	11.5741
KC2	355.074	4447777	356.081	356.081	-0.4335	356	C19H17O5P	12	19	17	0	5	1	0	0.263	0.895	0	0	0.5	-0.63	12.4694
KC6	355.074	5466975	356.081	356.081	-0.4335	356	C19H17O5P	12	19	17	0	5	1	0	0.263	0.895	0	0	0.5	-0.63	7.65693
KC18	355.102	3846568	356.109	356.11	-0.4427	356	C20H22O2P2	11	20	22	0	2	2	0	0.1	1.1	0	0	0.4	-1.4	23.1939
KC5	355.102	8613586	356.11	356.11	0.0628	356	C20H22O2P2	11	20	22	0	2	2	0	0.1	1.1	0	0	0.4	-1.4	15.4144
KC4	355.102	4828094	356.11	356.11	0.3436	356	C20H22O2P2	11	20	22	0	2	2	0	0.1	1.1	0	0	0.4	-1.4	11.1975
KC15	355.104	5316596	356.111	356.111	0.208	356	C16H20O9	7	16	20	0	9	0	0	0.562	1.25	0	0	-0.3	-0.12	17.8907
KC10	355.104	5665762	356.111	356.111	0.3765	356	C16H20O9	7	16	20	0	9	0	0	0.562	1.25	0	0	-0.3	-0.12	4.12009
KC18	355.138	4436398	356.146	356.146	-0.4581	356	C21H26OP2	10	21	26	0	1	2	0	0.048	1.238	0	0	0.4	-1.62	26.7504
KC17	355.139	6087148	356.146	356.146	-0.2054	356	C21H26OP2	10	21	26	0	1	2	0	0.048	1.238	0	0	0.4	-1.62	13.6129
KC5	355.139	10763981	356.146	356.146	0.1315	356	C21H26OP2	10	21	26	0	1	2	0	0.048	1.238	0	0	0.4	-1.62	19.2626
KC4	355.139	6708159	356.146	356.146	0.3281	356	C21H26OP2	10	21	26	0	1	2	0	0.048	1.238	0	0	0.4	-1.62	15.5578
KC12	355.139	5894892	356.146	356.146	0.3562	356	C21H26OP2	10	21	26	0	1	2	0	0.048	1.238	0	0	0.4	-1.62	11.7854
KC11	355.14	3871427	356.147	356.147	0.1645	356	C17H24O8	6	17	24	0	8	0	0	0.471	1.412	0	0	-0.2	-0.47	17.7618
KC10	355.14	9184224	356.147	356.147	0.3329	356	C17H24O8	6	17	24	0	8	0	0	0.471	1.412	0	0	-0.2	-0.47	6.67868
KC15	355.14	8163308	356.147	356.147	0.3891	356	C17H24O8	6	17	24	0	8	0	0	0.471	1.412	0	0	-0.2	-0.47	27.4701
KC17	355.175	4628972	356.182	356.182	-0.0805	356	C22H30P2	9	22	30	0	0	2	0	0	1.364	0	0	0.4	-1.82	10.3519
KC5	355.175	8834760	356.182	356.182	0.0599	356	C22H30P2	9	22	30	0	0	2	0	0	1.364	0	0	0.4	-1.82	15.8102
KC4	355.175	5241793	356.182	356.182	0.2845	356	C22H30P2	9	22	30	0	0	2	0	0	1.364	0	0	0.4	-1.82	12.1569
KC3	355.176	5272580	356.184	356.184	0.2893	356	C18H28O7	5	18	28	0	7	0	0	0.389	1.556	0	0	-0.2	-0.78	16.7742
KC10	355.176	5538782	356.184	356.184	0.4297	356	C18H28O7	5	18	28	0	7	0	0	0.389	1.556	0	0	-0.2	-0.78	4.02775
KC6	356.077	5926382	357.084	357.084	0.3376	357	C14H23N3P4	7	14	23	3	0	4	0	0	1.643	0.2143	0	0	-2.43	8.30036
KC6	356.122	4247050	357.129	357.129	-0.0201	357	C15H26N3OP3	6	15	26	3	1	3	0	0.067	1.733	0.2	0	-0.1	-2	5.94833
KC6	356.158	4095521	357.165	357.165	-0.2315	357	C16H30N3P3	5	16	30	3	0	3	0	0	1.875	0.1875	0	-0.1	-2.25	5.7361
KC19	356.968	3847831	357.975	357.975	0.3891	358	C19H2O8	19	19	2	0	8	0	0	0.421	0.105	0	0	1	0.74	10.899
KC9	356.983	1884108	357.99	357.99	-0.0471	358	C23H2O5	23	23	2	0	5	0	0	0.217	0.087	0	0	1	0.35	13.3772
KC21	356.985	1651307	357.992	357.992	-0.2872	358	C13H13O6P3	9	13	13	0	6	3	0	0.462	1	0	0	0	-1.23	8.07118
KC8	357.015	3893716	358.022	358.022	-0.0123	358	C10H16O10P2	4	10	16	0	10	2	0	1	1.6	0	0	4	-0.6	5.37111
KC5	357.081	5123508	358.089	358.089	-0.0341	358	C19H20O3P2	11	19	20	0	3	2	0	0.158	1.053	0	0	0.4	-1.26	9.16874
KC9	357.083	1553383	358.09	358.09	-0.3364	358	C15H18O10	7	15	18	0	10	0	0	0.667	1.2	0	0	-0.6	0.13	11.0291
KC10	357.083	3965790	358.09	358.09	0.4455	358	C15H18O10	7	15	18	0	10	0	0	0.667	1.2	0	0	-0.6	0.13	2.88388
KC21	357.087	1608342	358.095	358.095	-0.0152	358	C12H24O8P2	2	12	24	0	8	2	0	0.667	2	0	0	-4	-1.5	7.86118
KC6	357.09	3679321	358.097	358.097	-0.4591	358	C19H19O5P	11	19	19	0	5	1	0	0.263	1	0	0	0.4	-0.74	5.15318
KC4	357.097	4862993	358.104	358.104	0.2001	358	C23H20P2	15	23	20	0	0	2	0	0	0.87	0	0	0.6	-1.3	11.2784
KC15	357.098	4722170	358.105	358.105	0.0374	358	C19H18O7	11	19	18	0	7	0	0	0.368	0.947	0	0	0.3	-0.21	15.8904
KC19	357.118	4019837	358.125	358.125	-0.4962	358	C20H24O2P2	10	20	24	0	2	2	0	0.1	1.2	0	0	0.4	-1.5	11.3862
KC5	357.118	7757231	358.125	358.125	0.0064	358	C20H24O2P2	10	20	24	0	2	2	0	0.1	1.2	0	0	0.4	-1.5	13.8819
KC4	357.118	4226066	358.125	358.125	0.2019	358	C20H24O2P2	10	20	24	0	2	2	0	0.1	1.2	0	0	0.4	-1.5	9.80123
KC9	357.118	1758193	358.125	358.125	0.3973	358	C20H24O2P2	10	20	24	0	2	2	0	0.1	1.2	0	0	0.4	-1.5	12.4832
KC10	357.119	5237595	358.127	358.126	0.3463	358	C16H22O9	6	16	22	0	9	0	0	0.562	1.375	0	0	-0.4	-0.25	3.80873
KC15	357.119	4959732	358.127	358.126	0.4021	358	C16H22O9	6	16	22	0	9	0	0	0.562	1.375	0	0	-0.4	-0.25	16.6898
KC3	357.119	7316108	358.127	358.126	0.458	358	C16H22O9	6	16	22	0	9	0	0	0.562	1.375	0	0	-0.4	-0.25	23.2755
KC3	357.134	4203145	358.142	358.142	-0.0059	358	C20H22O6	10	20	22	0	6	0	0	0.3	1.1	0	0	0.3	-0.5	13.3719
KC17	357.154	4288876	358.161	358.162	-0.3999	358	C21H28OP2	9	21	28	0	1	2	0	0.048	1.333	0	0	0.3	-1.71	9.59133
KC5	357.154	8289705	358.162	358.162	0.0469	358	C21H28OP2	9	21	28	0	1	2	0	0.048	1.333	0	0	0.3	-1.71	14.8348
KC4	357.154	4424723	358.162	358.162	0.2702	358	C21H28OP2	9	21	28	0	1	2	0	0.048	1.333	0	0	0.3	-1.71	10.262
KC12	357.154	4134784	358.162	358.162	0.3261	358	C21H28OP2	9	21	28	0	1	2	0	0.048	1.333	0	0	0.3	-1.71	8.26648
KC10	357.156	5339992	358.163	358.163	0.3588	358	C17H26O8	5	17	26	0	8	0	0	0.471	1.529	0	0	-0.3	-0.59	3.88319
KC15	357.171	6020582	358.178	358.178	0.3137	358	C21H26O5	9	21	26	0	5	0	0	0.238	1.238	0	0	0.2	-0.76	20.2597
KC6	358.137	3908271	359.144	359.145	-0.2429	359	C15H28N3OP3	5	15	28	3	1	3	0	0.067	1.867	0.2	0	-0.2	-2.13	5.47384
KC6	358.174	4938435	359.181	359.181	-0.1747	359	C16H32N3P3	4	16	32	3	0	3	0	0	2	0.1875	0	-0.2	-2.38	6.91667
KC9	358.943	1946076	359.95	359.951	-0.4112	360	C15H7O5P3	14	15	7	0	5	3	0	0.333	0.467	0	0	0.9	-0.8	13.8172
KC9	358.954	1924574	359.961	359.961	-0.0534	360	C22HO4P	23	22	1	0	4	1	0	0.182	0.045	0	0	1.1	0.09	13.6645
KC21	358.959	1576869	359.966	359.966	-0.2894	360	C19H7O2P3	18	19	7	0	2	3	0	0.105	0.368	0	0	0.9	-0.95	7.70734
KC21	358.996	1594805	360.003	360.004	-0.411	360	C16H9O8P	13	16	9	0	8	1	0	0.5	0.562	0	0	0.6	0.12	7.79501
KC21	359.026	1692097	360.033	360.033	-0.1375	360	C13H12O12	8	13	12	0	12	0	0	0.923	0.923	0	0	-4	0.92	8.27055
KC20	359.026	1692097	360.033	360.033	-0.4407	360	C18H10N4OP2	17	18	10	4	1	2	0	0.056	0.556	0.2222	0	0.9	-0.33	8.27055
KC9	359.056	1565690	360.064	360.063	0.4116	360	C21H12O6	16	21	12	0	6	0	0	0.286	0.571	0	0	0.7	0	11.1164
KC9	359.098	1612293	360.106	360.106	-0.1126	360	C15H20O10	6	15	20	0	10	0	0	0.667	1.333	0	0	-0.8	0	11.4473
KC9	359.106	1702407	360.113	360.114	-0.3162	360	C20H25PS2	9	20	25	0	0	1	2	0	1.25	0	0.1	0.4	-1.3	12.0871
KC5	359.112	5565582	360.12	360.12	0.06	360	C23H22P2	14	23	22	0	0	2	0	0	0.957	0	0	0.6	-1.39	9.95985
KC4	359.112	4947035	360.12	360.12	0.0877	360	C23H22P2	14	23	22	0	0	2	0	0	0.957	0	0	0.6	-1.39	11.4733
KC12	359.113	5315416	360.12	360.12	0.2821	360	C23H22P2	14	23	22	0	0	2	0	0	0.957	0	0	0.6	-1.39	10.6269
KC15	359.114	7383995	360.121	360.121	0.398	360	C19H20O7	10	19	20	0	7	0	0	0.368	1.053	0	0	0.2	-0.32	24.8476
KC5	359.127	4099211	360.134	360.134	0.3781	360	C16H25O7P	5	16	25	0	7	1	0	0.438	1.562	0	0	-0.4	-1	7.33572
KC5	359.133	3898506	360.141	360.141	-0.2993	360	C20H26O2P2	9	20	26	0	2	2	0	0.1	1.3	0	0	0.3	-1.6	6.97655
KC10	359.135	4840086	360.142	360.142	0.4552	360	C16H24O9	5	16	24	0	9	0	0	0.562	1.5	0	0	-0.6	-0.38	3.51966
KC11	359.15	4233464	360.157	360.157	-0.2004	360	C20H24O6	9	20	24	0	6	0	0	0.3	1.2	0	0	0.2	-0.6	19.4228
KC10	359.15	4453012	360.157	360.157	0.3826	360	C20H24O6	9	20	24	0	6	0	0	0.3	1.2	0	0	0.2	-0.6	3.23819
KC15	359.15	8952752	360.157	360.157	0.4104	360	C20H24O6	9	20	24	0	6	0	0	0.3	1.2	0	0	0.2	-0.6	30.1266
KC9	359.163	1707030	360.17	360.17	-0.4147	360	C17H29O6P	4	17	29	0	6	1	0	0.353	1.706	0	0	-0.3	-1.29	12.1199
KC15	359.187	4938661	360.194	360.194	0.3395	360	C21H28O5	8	21	28	0	5	0	0	0.238	1.333	0	0	0.2	-0.86	16.6189
KC20	359.28	1637421	360.288	360.288	-0.1057	360	C20H40O5	1	20	40	0	5	0	0	0.25	2	0	0	-0.3	-1.5	8.00331
KC6	360.108	8136358	361.116	361.116	0.195	361	C14H27N3P4	5	14	27	3	0	4	0	0	1.929	0.2143	0	-0.3	-2.71	11.3956
KC9	360.89	1600224	361.897	361.897	0.0874	362	C10H5O7P3S	10	10	5	0	7	3	1	0.7	0.5	0	0.1	1	-0.4	11.3616
KC19	360.893	35304344	361.9	361.901	-0.4725	362	C17H2O2P4	19	17	2	0	2	4	0	0.118	0.118	0	0	1.2	-1.06	100
KC5	360.893	35502988	361.9	361.901	-0.4172	362	C17H2O2P4	19	17	2	0	2	4	0	0.118	0.118	0	0	1.2	-1.06	63.5342
KC4	360.893	43117720	361.9	361.901	-0.1685	362	C17H2O2P4	19	17	2	0	2	4	0	0.118	0.118	0	0	1.2	-1.06	100
KC12	360.893	45694560	361.9	361.901	-0.1409	362	C17H2O2P4	19	17	2	0	2	4	0	0.118	0.118	0	0	1.2	-1.06	91.355
KC20	360.97	1832697	361.977	361.977	0.1678	362	C22H3O4P	22	22	3	0	4	1	0	0.182	0.136	0	0	1	0	8.95777
KC5	361.092	4324209	362.099	362.099	-0.0082	362	C22H20OP2	14	22	20	0	1	2	0	0.045	0.909	0	0	0.6	-1.27	7.73836
KC4	361.092	4689053	362.099	362.099	0.1023	362	C22H20OP2	14	22	20	0	1	2	0	0.045	0.909	0	0	0.6	-1.27	10.875
KC9	361.092	1684501	362.099	362.099	0.1023	362	C22H20OP2	14	22	20	0	1	2	0	0.045	0.909	0	0	0.6	-1.27	11.96
KC12	361.092	5496494	362.099	362.099	0.2956	362	C22H20OP2	14	22	20	0	1	2	0	0.045	0.909	0	0	0.6	-1.27	10.9889
KC3	361.093	6242066	362.1	362.1	0.4385	362	C18H18O8	10	18	18	0	8	0	0	0.444	1	0	0	0.2	-0.11	19.8585
KC9	361.102	4013080	362.109	362.11	-0.3705	362	C29H14	23	29	14	0	0	0	0	0	0.483	0	0	0.8	-0.48	28.493
KC17	361.102	10161769	362.11	362.11	-0.1219	362	C29H14	23	29	14	0	0	0	0	0	0.483	0	0	0.8	-0.48	22.725
KC19	361.102	10031978	362.11	362.11	0.0162	362	C29H14	23	29	14	0	0	0	0	0	0.483	0	0	0.8	-0.48	28.4157
KC5	361.102	4533103	362.11	362.11	0.1818	362	C29H14	23	29	14	0	0	0	0	0	0.483	0	0	0.8	-0.48	8.11219
KC4	361.102	15477917	362.11	362.11	0.3752	362	C29H14	23	29	14	0	0	0	0	0	0.483	0	0	0.8	-0.48	35.8969
KC12	361.102	7577266	362.11	362.11	0.3752	362	C29H14	23	29	14	0	0	0	0	0	0.483	0	0	0.8	-0.48	15.1489
KC5	361.105	4307823	362.112	362.112	0.2758	362	C19H25OP3	9	19	25	0	1	3	0	0.053	1.316	0	0	0.3	-2	7.70904
KC6	361.123	3932285	362.131	362.131	-0.4792	362	C26H18O2	18	26	18	0	2	0	0	0.077	0.692	0	0	0.7	-0.54	5.50747
KC17	361.128	5680738	362.135	362.135	-0.0786	362	C23H24P2	13	23	24	0	0	2	0	0	1.043	0	0	0.5	-1.48	12.704
KC19	361.128	6296420	362.135	362.135	-0.0786	362	C23H24P2	13	23	24	0	0	2	0	0	1.043	0	0	0.5	-1.48	17.8347
KC5	361.128	9853803	362.135	362.135	0.0042	362	C23H24P2	13	23	24	0	0	2	0	0	1.043	0	0	0.5	-1.48	17.6338
KC12	361.128	10067644	362.135	362.135	0.1975	362	C23H24P2	13	23	24	0	0	2	0	0	1.043	0	0	0.5	-1.48	20.1278
KC4	361.128	6589598	362.135	362.135	0.3356	362	C23H24P2	13	23	24	0	0	2	0	0	1.043	0	0	0.5	-1.48	15.2828
KC11	361.129	4286236	362.136	362.137	-0.3224	362	C19H22O7	9	19	22	0	7	0	0	0.368	1.158	0	0	0.2	-0.42	19.6649
KC15	361.129	10320197	362.137	362.137	0.4232	362	C19H22O7	9	19	22	0	7	0	0	0.368	1.158	0	0	0.2	-0.42	34.7282
KC3	361.129	11452169	362.137	362.137	0.4784	362	C19H22O7	9	19	22	0	7	0	0	0.368	1.158	0	0	0.2	-0.42	36.4339
KC2	361.142	4001967	362.149	362.149	-0.3698	362	C16H27O7P	4	16	27	0	7	1	0	0.438	1.688	0	0	-0.5	-1.12	11.2196
KC20	361.166	1730380	362.173	362.173	-0.3652	362	C20H26O6	8	20	26	0	6	0	0	0.3	1.3	0	0	0.1	-0.7	8.45767
KC11	361.166	4069138	362.173	362.173	-0.3376	362	C20H26O6	8	20	26	0	6	0	0	0.3	1.3	0	0	0.1	-0.7	18.6689
KC10	361.166	5634456	362.173	362.173	0.3803	362	C20H26O6	8	20	26	0	6	0	0	0.3	1.3	0	0	0.1	-0.7	4.09732
KC15	361.166	9853241	362.173	362.173	0.4079	362	C20H26O6	8	20	26	0	6	0	0	0.3	1.3	0	0	0.1	-0.7	33.1568
KC20	361.199	1923930	362.206	362.206	0.3851	362	C18H37OP3	2	18	37	0	1	3	0	0.056	2.056	0	0	-0.1	-2.78	9.40369
KC9	361.223	1571383	362.23	362.23	0.0355	362	C18H34O7	2	18	34	0	7	0	0	0.389	1.889	0	0	-0.5	-1.11	11.1569
KC9	362.048	1846031	363.055	363.055	0.1324	363	C11H13N3O11	7	11	13	3	11	0	0	1	1.182	0.2727	0	2.3	1.64	13.1069
KC20	362.93	1786431	363.937	363.937	-0.1935	364	C14H8O4P4	13	14	8	0	4	4	0	0.286	0.571	0	0	0.8	-1.43	8.73163
KC20	362.97	2045520	363.977	363.977	0.1011	364	C18H5O7P	17	18	5	0	7	1	0	0.389	0.278	0	0	0.9	0.22	9.99799
KC9	363.05	1862164	364.057	364.057	0.4171	364	C24H14P2	19	24	14	0	0	2	0	0	0.583	0	0	0.8	-1	13.2214
KC5	363.071	4717144	364.078	364.078	-0.103	364	C21H18O2P2	14	21	18	0	2	2	0	0.095	0.857	0	0	0.6	-1.14	8.44154
KC10	363.072	3862652	364.08	364.079	0.3412	364	C17H16O9	10	17	16	0	9	0	0	0.529	0.941	0	0	0.1	0.12	2.80888
KC2	363.1	6167137	364.107	364.108	-0.3271	364	C18H21O6P	9	18	21	0	6	1	0	0.333	1.167	0	0	0.2	-0.78	17.2896
KC6	363.1	4254643	364.107	364.108	-0.2996	364	C18H21O6P	9	18	21	0	6	1	0	0.333	1.167	0	0	0.2	-0.78	5.95896
KC9	363.101	1777185	364.108	364.108	0.2986	364	C10H27N2O6P3	0	10	27	2	6	3	0	0.6	2.7	0.2	0	11	-2.4	12.6181
KC20	363.105	1818250	364.112	364.112	-0.2857	364	C15H27O4P3	4	15	27	0	4	3	0	0.267	1.8	0	0	-0.4	-2.27	8.88715
KC17	363.107	5540856	364.114	364.115	-0.4477	364	C22H22OP2	13	22	22	0	1	2	0	0.045	1	0	0	0.5	-1.36	12.3912
KC19	363.107	4022692	364.115	364.115	-0.2006	364	C22H22OP2	13	22	22	0	1	2	0	0.045	1	0	0	0.5	-1.36	11.3943
KC5	363.107	8125011	364.115	364.115	-0.0083	364	C22H22OP2	13	22	22	0	1	2	0	0.045	1	0	0	0.5	-1.36	14.5401
KC4	363.107	6474970	364.115	364.115	0.1839	364	C22H22OP2	13	22	22	0	1	2	0	0.045	1	0	0	0.5	-1.36	15.017
KC12	363.107	7217552	364.115	364.115	0.2938	364	C22H22OP2	13	22	22	0	1	2	0	0.045	1	0	0	0.5	-1.36	14.4297
KC20	363.108	2216588	364.116	364.116	-0.4979	364	C18H20O8	9	18	20	0	8	0	0	0.444	1.111	0	0	0.1	-0.22	10.8341
KC11	363.108	4412590	364.116	364.116	-0.1684	364	C18H20O8	9	18	20	0	8	0	0	0.444	1.111	0	0	0.1	-0.22	20.2446
KC15	363.109	10245804	364.116	364.116	0.4358	364	C18H20O8	9	18	20	0	8	0	0	0.444	1.111	0	0	0.1	-0.22	34.4778
KC10	363.109	5931127	364.116	364.116	0.4908	364	C18H20O8	9	18	20	0	8	0	0	0.444	1.111	0	0	0.1	-0.22	4.31306
KC3	363.109	9485598	364.116	364.116	0.4908	364	C18H20O8	9	18	20	0	8	0	0	0.444	1.111	0	0	0.1	-0.22	30.1775
KC20	363.116	2020495	364.123	364.123	0.2328	364	C22H21O3P	13	22	21	0	3	1	0	0.136	0.955	0	0	0.5	-0.91	9.87568
KC18	363.144	6700554	364.151	364.151	-0.4903	364	C23H26P2	12	23	26	0	0	2	0	0	1.13	0	0	0.5	-1.57	40.4027
KC17	363.144	8481771	364.151	364.151	-0.2157	364	C23H26P2	12	23	26	0	0	2	0	0	1.13	0	0	0.5	-1.57	18.968
KC19	363.144	7188892	364.151	364.151	-0.1058	364	C23H26P2	12	23	26	0	0	2	0	0	1.13	0	0	0.5	-1.57	20.3626
KC5	363.144	16742990	364.151	364.151	-0.0234	364	C23H26P2	12	23	26	0	0	2	0	0	1.13	0	0	0.5	-1.57	29.9623
KC12	363.144	12698012	364.151	364.151	0.2237	364	C23H26P2	12	23	26	0	0	2	0	0	1.13	0	0	0.5	-1.57	25.3865
KC4	363.144	10783963	364.151	364.151	0.2786	364	C23H26P2	12	23	26	0	0	2	0	0	1.13	0	0	0.5	-1.57	25.0105
KC11	363.145	5846177	364.152	364.152	0.201	364	C19H24O7	8	19	24	0	7	0	0	0.368	1.263	0	0	0.1	-0.53	26.8218
KC15	363.145	14882464	364.152	364.152	0.3383	364	C19H24O7	8	19	24	0	7	0	0	0.368	1.263	0	0	0.1	-0.53	50.0805
KC10	363.145	10309745	364.152	364.152	0.3658	364	C19H24O7	8	19	24	0	7	0	0	0.368	1.263	0	0	0.1	-0.53	7.49715
KC11	363.181	4375700	364.189	364.189	-0.0613	364	C20H28O6	7	20	28	0	6	0	0	0.3	1.4	0	0	0.1	-0.8	20.0754
KC10	363.181	6148203	364.189	364.189	0.2957	364	C20H28O6	7	20	28	0	6	0	0	0.3	1.4	0	0	0.1	-0.8	4.47091
KC15	363.181	9254547	364.189	364.189	0.3506	364	C20H28O6	7	20	28	0	6	0	0	0.3	1.4	0	0	0.1	-0.8	31.1422
KC15	363.218	4073095	364.225	364.225	0.0609	364	C21H32O5	6	21	32	0	5	0	0	0.238	1.524	0	0	0.1	-1.05	13.7062
KC9	363.319	1626714	364.326	364.326	0.4882	364	C24H45P	3	24	45	0	0	1	0	0	1.875	0	0	0.1	-2.08	11.5497
KC9	364.017	1825550	365.025	365.025	-0.1809	365	C14H14N3O3P3	11	14	14	3	3	3	0	0.214	1	0.2143	0	0.4	-1	12.9614
KC12	364.888	8618937	365.895	365.895	-0.2887	366	C16H2O3P4	18	16	2	0	3	4	0	0.188	0.125	0	0	1.2	-1	17.2314
KC4	364.888	6544655	365.895	365.895	-0.1247	366	C16H2O3P4	18	16	2	0	3	4	0	0.188	0.125	0	0	1.2	-1	15.1786
KC13	364.888	5494855	365.896	365.895	0.4493	366	C16H2O3P4	18	16	2	0	3	4	0	0.188	0.125	0	0	1.2	-1	24.7103
KC9	364.941	1758203	365.948	365.948	-0.0971	366	C17H4O6P2	17	17	4	0	6	2	0	0.353	0.235	0	0	1	-0.12	12.4833
KC20	364.99	1627575	365.998	365.998	0.0049	366	C15H13O5P3	11	15	13	0	5	3	0	0.333	0.867	0	0	0.4	-1.2	7.95518
KC5	365.076	4176196	366.083	366.083	0.3103	366	C14H26O3P4	4	14	26	0	3	4	0	0.214	1.857	0	0	-0.4	-2.86	7.47349
KC9	365.086	2041888	366.094	366.094	-0.2675	366	C14H10N10O3	15	14	10	10	3	0	0	0.214	0.714	0.7143	0	2	1.86	14.4974
KC5	365.087	5351747	366.094	366.094	-0.0753	366	C21H20O2P2	13	21	20	0	2	2	0	0.095	0.952	0	0	0.5	-1.24	9.57719
KC12	365.087	4412402	366.094	366.094	0.2251	366	C21H20O2P2	13	21	20	0	2	2	0	0.095	0.952	0	0	0.5	-1.24	8.82151
KC15	365.088	4903919	366.095	366.095	0.3664	366	C17H18O9	9	17	18	0	9	0	0	0.529	1.059	0	0	0	0	16.502
KC17	365.123	7792886	366.13	366.13	-0.4728	366	C22H24OP2	12	22	24	0	1	2	0	0.045	1.091	0	0	0.5	-1.45	17.4274
KC19	365.123	5992383	366.13	366.13	-0.145	366	C22H24OP2	12	22	24	0	1	2	0	0.045	1.091	0	0	0.5	-1.45	16.9735
KC5	365.123	14203198	366.13	366.13	-0.0904	366	C22H24OP2	12	22	24	0	1	2	0	0.045	1.091	0	0	0.5	-1.45	25.4173
KC22	365.123	4777912	366.13	366.13	-0.0631	366	C22H24OP2	12	22	24	0	1	2	0	0.045	1.091	0	0	0.5	-1.45	27.2611
KC4	365.123	8817942	366.13	366.13	0.1554	366	C22H24OP2	12	22	24	0	1	2	0	0.045	1.091	0	0	0.5	-1.45	20.4509
KC12	365.123	11387900	366.13	366.13	0.2101	366	C22H24OP2	12	22	24	0	1	2	0	0.045	1.091	0	0	0.5	-1.45	22.7673
KC11	365.124	5628331	366.131	366.131	-0.2222	366	C18H22O8	8	18	22	0	8	0	0	0.444	1.222	0	0	0	-0.33	25.8224
KC15	365.124	14226402	366.132	366.131	0.324	366	C18H22O8	8	18	22	0	8	0	0	0.444	1.222	0	0	0	-0.33	47.8728
KC10	365.124	9953058	366.132	366.131	0.4333	366	C18H22O8	8	18	22	0	8	0	0	0.444	1.222	0	0	0	-0.33	7.23777
KC17	365.159	10176743	366.166	366.167	-0.4058	366	C23H28P2	11	23	28	0	0	2	0	0	1.217	0	0	0.4	-1.65	22.7585
KC19	365.159	5824438	366.167	366.167	-0.2693	366	C23H28P2	11	23	28	0	0	2	0	0	1.217	0	0	0.4	-1.65	16.4978
KC5	365.159	22395192	366.167	366.167	-0.1327	366	C23H28P2	11	23	28	0	0	2	0	0	1.217	0	0	0.4	-1.65	40.0772
KC4	365.159	11570455	366.167	366.167	0.1404	366	C23H28P2	11	23	28	0	0	2	0	0	1.217	0	0	0.4	-1.65	26.8346
KC12	365.159	13370374	366.167	366.167	0.2223	366	C23H28P2	11	23	28	0	0	2	0	0	1.217	0	0	0.4	-1.65	26.7308
KC11	365.161	5497244	366.168	366.168	-0.128	366	C19H26O7	7	19	26	0	7	0	0	0.368	1.368	0	0	0	-0.63	25.2209
KC15	365.161	16683989	366.168	366.168	0.3363	366	C19H26O7	7	19	26	0	7	0	0	0.368	1.368	0	0	0	-0.63	56.1427
KC10	365.161	11910940	366.168	366.168	0.3636	366	C19H26O7	7	19	26	0	7	0	0	0.368	1.368	0	0	0	-0.63	8.66152
KC11	365.197	4968845	366.204	366.204	-0.2796	366	C20H30O6	6	20	30	0	6	0	0	0.3	1.5	0	0	0	-0.9	22.7967
KC15	365.197	8410055	366.204	366.204	0.3758	366	C20H30O6	6	20	30	0	6	0	0	0.3	1.5	0	0	0	-0.9	28.3004
KC20	365.197	1639952	366.204	366.204	0.3758	366	C20H30O6	6	20	30	0	6	0	0	0.3	1.5	0	0	0	-0.9	8.01568
KC10	365.197	5324565	366.204	366.204	0.3758	366	C20H30O6	6	20	30	0	6	0	0	0.3	1.5	0	0	0	-0.9	3.87197
KC3	365.197	11565825	366.204	366.204	0.4577	366	C20H30O6	6	20	30	0	6	0	0	0.3	1.5	0	0	0	-0.9	36.7955
KC9	365.28	1714770	366.287	366.287	0.2861	366	C15H39N6O2P	0	15	39	6	2	1	0	0.133	2.6	0.4	0	-1.5	-1.47	12.1749
KC9	365.379	1565291	366.386	366.386	0.1367	366	C25H50O	1	25	50	0	1	0	0	0.04	2	0	0	0	-1.92	11.1136
KC20	366.086	1744785	367.093	367.093	-0.2615	367	C15H18N3O6P	9	15	18	3	6	1	0	0.4	1.2	0.2	0	-0.2	-0.13	8.52808
KC14	366.875	5498546	367.882	367.883	-0.457	368	C16HO3PS3	17	16	1	0	3	1	3	0.188	0.062	0	0.1875	1.1	0.38	12.3528
KC9	366.995	1566213	368.003	368.003	-0.4622	368	C25H5O2P	24	25	5	0	2	1	0	0.08	0.2	0	0	1	-0.24	11.1201
KC20	367.008	1893665	368.015	368.016	-0.2915	368	C22H10O2P2	19	22	10	0	2	2	0	0.091	0.455	0	0	0.8	-0.73	9.25576
KC5	367.045	4028479	368.052	368.052	-0.1705	368	C23H14OP2	18	23	14	0	1	2	0	0.043	0.609	0	0	0.8	-0.96	7.20914
KC5	367.092	4773945	368.099	368.099	0.1998	368	C14H28O3P4	3	14	28	0	3	4	0	0.214	2	0	0	-0.6	-3	8.54319
KC17	367.092	4015502	368.099	368.099	0.2813	368	C14H28O3P4	3	14	28	0	3	4	0	0.214	2	0	0	-0.6	-3	8.97998
KC4	367.092	4246864	368.099	368.099	0.4986	368	C14H28O3P4	3	14	28	0	3	4	0	0.214	2	0	0	-0.6	-3	9.84946
KC17	367.102	3855753	368.109	368.11	-0.3468	368	C21H22O2P2	12	21	22	0	2	2	0	0.095	1.048	0	0	0.5	-1.33	8.62273
KC5	367.102	7262264	368.109	368.11	-0.1838	368	C21H22O2P2	12	21	22	0	2	2	0	0.095	1.048	0	0	0.5	-1.33	12.9961
KC12	367.102	5617143	368.109	368.11	-0.1566	368	C21H22O2P2	12	21	22	0	2	2	0	0.095	1.048	0	0	0.5	-1.33	11.2301
KC4	367.102	5607761	368.109	368.11	-0.0208	368	C21H22O2P2	12	21	22	0	2	2	0	0.095	1.048	0	0	0.5	-1.33	13.0057
KC20	367.102	3060042	368.11	368.11	0.4682	368	C21H22O2P2	12	21	22	0	2	2	0	0.095	1.048	0	0	0.5	-1.33	14.9567
KC11	367.103	4034111	368.111	368.111	-0.2606	368	C17H20O9	8	17	20	0	9	0	0	0.529	1.176	0	0	-0.1	-0.12	18.5082
KC15	367.104	7434503	368.111	368.111	0.3099	368	C17H20O9	8	17	20	0	9	0	0	0.529	1.176	0	0	-0.1	-0.12	25.0176
KC10	367.104	5975475	368.111	368.111	0.3914	368	C17H20O9	8	17	20	0	9	0	0	0.529	1.176	0	0	-0.1	-0.12	4.34531
KC3	367.104	9148675	368.111	368.111	0.4457	368	C17H20O9	8	17	20	0	9	0	0	0.529	1.176	0	0	-0.1	-0.12	29.1056
KC20	367.106	5101900	368.113	368.113	0.1881	368	C19H12N8O	18	19	12	8	1	0	0	0.053	0.632	0.4211	0	0.9	0.74	24.9368
KC7	367.107	6711151	368.114	368.114	-0.0071	368	C18H28P4	7	18	28	0	0	4	0	0	1.556	0	0	0.2	-2.67	14.7961
KC10	367.107	19324338	368.114	368.114	0.2374	368	C18H28P4	7	18	28	0	0	4	0	0	1.556	0	0	0.2	-2.67	14.0525
KC15	367.107	6451461	368.114	368.114	0.2646	368	C18H28P4	7	18	28	0	0	4	0	0	1.556	0	0	0.2	-2.67	21.7096
KC3	367.107	5970178	368.114	368.114	0.2918	368	C18H28P4	7	18	28	0	0	4	0	0	1.556	0	0	0.2	-2.67	18.9935
KC9	367.116	1999396	368.124	368.124	0.0731	368	C14H25O9P	3	14	25	0	9	1	0	0.643	1.786	0	0	-1.8	-0.86	14.1958
KC18	367.125	3913651	368.132	368.132	0.0128	368	C14H24O11	3	14	24	0	11	0	0	0.786	1.714	0	0	-2.7	-0.14	23.5984
KC4	367.128	5500241	368.135	368.135	0.4565	368	C15H32O2P4	2	15	32	0	2	4	0	0.133	2.133	0	0	-0.4	-3.2	12.7563
KC9	367.138	3985962	368.146	368.146	-0.4975	368	C22H26OP2	11	22	26	0	1	2	0	0.045	1.182	0	0	0.4	-1.55	28.3004
KC19	367.138	7450051	368.146	368.146	-0.4703	368	C22H26OP2	11	22	26	0	1	2	0	0.045	1.182	0	0	0.4	-1.55	21.1024
KC17	367.138	9897335	368.146	368.146	-0.3889	368	C22H26OP2	11	22	26	0	1	2	0	0.045	1.182	0	0	0.4	-1.55	22.1337
KC18	367.139	5785524	368.146	368.146	-0.253	368	C22H26OP2	11	22	26	0	1	2	0	0.045	1.182	0	0	0.4	-1.55	34.8853
KC5	367.139	22132786	368.146	368.146	-0.1172	368	C22H26OP2	11	22	26	0	1	2	0	0.045	1.182	0	0	0.4	-1.55	39.6076
KC12	367.139	12895744	368.146	368.146	0.1001	368	C22H26OP2	11	22	26	0	1	2	0	0.045	1.182	0	0	0.4	-1.55	25.7819
KC4	367.139	10784081	368.146	368.146	0.1544	368	C22H26OP2	11	22	26	0	1	2	0	0.045	1.182	0	0	0.4	-1.55	25.0108
KC11	367.14	4623918	368.147	368.147	-0.2484	368	C18H24O8	7	18	24	0	8	0	0	0.444	1.333	0	0	-0.1	-0.44	21.2142
KC15	367.14	13832441	368.147	368.147	0.3492	368	C18H24O8	7	18	24	0	8	0	0	0.444	1.333	0	0	-0.1	-0.44	46.5471
KC10	367.14	10309035	368.147	368.147	0.4036	368	C18H24O8	7	18	24	0	8	0	0	0.444	1.333	0	0	-0.1	-0.44	7.49663
KC20	367.158	2045282	368.166	368.166	-0.4587	368	C19H28O5S	6	19	28	0	5	0	1	0.263	1.474	0	0.0526	0	-0.84	9.99683
KC17	367.175	9020774	368.182	368.182	-0.4853	368	C23H30P2	10	23	30	0	0	2	0	0	1.304	0	0	0.4	-1.74	20.1734
KC19	367.175	4533690	368.182	368.182	-0.268	368	C23H30P2	10	23	30	0	0	2	0	0	1.304	0	0	0.4	-1.74	12.8417
KC5	367.175	15448110	368.182	368.182	-0.1593	368	C23H30P2	10	23	30	0	0	2	0	0	1.304	0	0	0.4	-1.74	27.6451
KC12	367.175	8709640	368.182	368.182	0.1394	368	C23H30P2	10	23	30	0	0	2	0	0	1.304	0	0	0.4	-1.74	17.4128
KC4	367.175	9604435	368.182	368.182	0.1666	368	C23H30P2	10	23	30	0	0	2	0	0	1.304	0	0	0.4	-1.74	22.2749
KC20	367.175	5122410	368.182	368.182	0.3296	368	C23H30P2	10	23	30	0	0	2	0	0	1.304	0	0	0.4	-1.74	25.0371
KC11	367.176	4722204	368.183	368.184	-0.2361	368	C19H28O7	6	19	28	0	7	0	0	0.368	1.474	0	0	-0.1	-0.74	21.6651
KC15	367.176	10997995	368.184	368.184	0.3614	368	C19H28O7	6	19	28	0	7	0	0	0.368	1.474	0	0	-0.1	-0.74	37.009
KC10	367.176	7028133	368.184	368.184	0.47	368	C19H28O7	6	19	28	0	7	0	0	0.368	1.474	0	0	-0.1	-0.74	5.11079
KC11	367.234	4054529	368.241	368.241	0.0765	368	C17H36O8	0	17	36	0	8	0	0	0.471	2.118	0	0	-0.9	-1.18	18.6019
KC6	368.085	4112882	369.092	369.092	-0.14	369	C15H22N3O2P3	8	15	22	3	2	3	0	0.133	1.467	0.2	0	0	-1.6	5.76042
KC20	368.263	1590082	369.27	369.27	0.1057	369	C13H35N7O5	0	13	35	7	5	0	0	0.385	2.692	0.5385	0	-12	-0.31	7.77193
KC9	368.88	1633247	369.887	369.887	-0.0614	370	C10H11OPS6	6	10	11	0	1	1	6	0.1	1.1	0	0.6	-1	-0.2	11.5961
KC11	368.953	4135597	369.96	369.96	0.285	370	C16H2O11	16	16	2	0	11	0	0	0.688	0.125	0	0	1	1.25	18.9738
KC14	368.977	4300410	369.984	369.984	0.1605	370	C14H14O4P4	10	14	14	0	4	4	0	0.286	1	0	0	0.3	-1.86	9.66109
KC6	369.053	3654375	370.06	370.061	-0.4294	370	C19H15O6P	13	19	15	0	6	1	0	0.316	0.789	0	0	0.5	-0.42	5.11824
KC5	369.071	5003072	370.078	370.078	-0.0919	370	C30H10	26	30	10	0	0	0	0	0	0.333	0	0	0.9	-0.33	8.95322
KC4	369.071	3894670	370.078	370.078	0.3134	370	C30H10	26	30	10	0	0	0	0	0	0.333	0	0	0.9	-0.33	9.03264
KC9	369.075	1731599	370.082	370.082	0.356	370	C16H19O8P	8	16	19	0	8	1	0	0.5	1.188	0	0	-0.1	-0.5	12.2944
KC5	369.081	4106047	370.089	370.089	-0.087	370	C20H20O3P2	12	20	20	0	3	2	0	0.15	1	0	0	0.5	-1.2	7.34795
KC3	369.083	5211882	370.09	370.09	0.323	370	C16H18O10	8	16	18	0	10	0	0	0.625	1.125	0	0	-0.3	0.12	16.5811
KC10	369.083	4611112	370.09	370.09	0.4581	370	C16H18O10	8	16	18	0	10	0	0	0.625	1.125	0	0	-0.3	0.12	3.35316
KC20	369.095	1737900	370.102	370.102	0.4611	370	C17H25O3P3	7	17	25	0	3	3	0	0.176	1.471	0	0	0.1	-2	8.49442
KC5	369.107	4544316	370.115	370.115	0.1985	370	C14H30O3P4	2	14	30	0	3	4	0	0.214	2.143	0	0	-0.7	-3.14	8.13225
KC9	369.111	1715736	370.118	370.118	-0.1993	370	C17H23O7P	7	17	23	0	7	1	0	0.412	1.353	0	0	-0.1	-0.82	12.1818
KC5	369.118	10286906	370.125	370.125	-0.21	370	C21H24O2P2	11	21	24	0	2	2	0	0.095	1.143	0	0	0.4	-1.43	18.4089
KC19	369.118	4201410	370.125	370.125	-0.0208	370	C21H24O2P2	11	21	24	0	2	2	0	0.095	1.143	0	0	0.4	-1.43	11.9005
KC4	369.118	6684047	370.125	370.125	0.0872	370	C21H24O2P2	11	21	24	0	2	2	0	0.095	1.143	0	0	0.4	-1.43	15.5019
KC12	369.118	6309796	370.125	370.125	0.1683	370	C21H24O2P2	11	21	24	0	2	2	0	0.095	1.143	0	0	0.4	-1.43	12.6149
KC10	369.119	8526880	370.126	370.126	0.281	370	C17H22O9	7	17	22	0	9	0	0	0.529	1.294	0	0	-0.2	-0.24	6.20066
KC15	369.119	9129480	370.127	370.126	0.3621	370	C17H22O9	7	17	22	0	9	0	0	0.529	1.294	0	0	-0.2	-0.24	30.7213
KC3	369.119	11769568	370.127	370.126	0.4701	370	C17H22O9	7	17	22	0	9	0	0	0.529	1.294	0	0	-0.2	-0.24	37.4437
KC4	369.126	7220624	370.133	370.133	-0.2429	370	C21H23O4P	11	21	23	0	4	1	0	0.19	1.095	0	0	0.4	-0.95	16.7463
KC15	369.134	4554242	370.142	370.142	0.2644	370	C21H22O6	11	21	22	0	6	0	0	0.286	1.048	0	0	0.3	-0.48	15.3253
KC2	369.147	5249887	370.154	370.155	-0.4844	370	C18H27O6P	6	18	27	0	6	1	0	0.333	1.5	0	0	-0.1	-1.11	14.7181
KC17	369.154	8290698	370.161	370.162	-0.4139	370	C22H28OP2	10	22	28	0	1	2	0	0.045	1.273	0	0	0.4	-1.64	18.5407
KC5	369.154	14530358	370.161	370.162	-0.1978	370	C22H28OP2	10	22	28	0	1	2	0	0.045	1.273	0	0	0.4	-1.64	26.0027
KC19	369.154	4082617	370.162	370.162	0.0723	370	C22H28OP2	10	22	28	0	1	2	0	0.045	1.273	0	0	0.4	-1.64	11.5641
KC12	369.154	6621099	370.162	370.162	0.0994	370	C22H28OP2	10	22	28	0	1	2	0	0.045	1.273	0	0	0.4	-1.64	13.2373
KC4	369.154	9039248	370.162	370.162	0.1264	370	C22H28OP2	10	22	28	0	1	2	0	0.045	1.273	0	0	0.4	-1.64	20.9641
KC20	369.154	4365510	370.162	370.162	0.3425	370	C22H28OP2	10	22	28	0	1	2	0	0.045	1.273	0	0	0.4	-1.64	21.3375
KC11	369.155	4827715	370.163	370.163	-0.3282	370	C18H26O8	6	18	26	0	8	0	0	0.444	1.444	0	0	-0.2	-0.56	22.1492
KC15	369.156	7863802	370.163	370.163	0.3201	370	C18H26O8	6	18	26	0	8	0	0	0.444	1.444	0	0	-0.2	-0.56	26.4622
KC10	369.156	9444377	370.163	370.163	0.4282	370	C18H26O8	6	18	26	0	8	0	0	0.444	1.444	0	0	-0.2	-0.56	6.86786
KC5	369.191	7915313	370.198	370.198	-0.1586	370	C23H32P2	9	23	32	0	0	2	0	0	1.391	0	0	0.3	-1.83	14.1648
KC12	369.191	4280242	370.198	370.198	-0.0506	370	C23H32P2	9	23	32	0	0	2	0	0	1.391	0	0	0.3	-1.83	8.55729
KC20	369.191	2262230	370.198	370.198	0.0304	370	C23H32P2	9	23	32	0	0	2	0	0	1.391	0	0	0.3	-1.83	11.0572
KC4	369.191	6188434	370.198	370.198	0.2465	370	C23H32P2	9	23	32	0	0	2	0	0	1.391	0	0	0.3	-1.83	14.3524
KC10	369.192	5282834	370.199	370.199	0.2782	370	C19H30O7	5	19	30	0	7	0	0	0.368	1.579	0	0	-0.2	-0.84	3.84163
KC9	370.034	1823486	371.041	371.041	-0.3708	371	C9H11N9O4P2	10	9	11	9	4	2	0	0.444	1.222	1	0	0.8	1.56	12.9468
KC6	370.137	3822565	371.144	371.145	-0.4506	371	C16H28N3OP3	6	16	28	3	1	3	0	0.062	1.75	0.1875	0	-0.1	-2	5.3538
KC20	370.943	1628624	371.951	371.951	-0.3442	372	C16H7O5P3	15	16	7	0	5	3	0	0.312	0.438	0	0	0.9	-0.75	7.96031
KC9	370.967	1725413	371.974	371.974	0.4399	372	C20H6O4P2	19	20	6	0	4	2	0	0.2	0.3	0	0	0.9	-0.4	12.2505
KC9	371.004	1606894	372.012	372.012	-0.4305	372	C17H8O10	14	17	8	0	10	0	0	0.588	0.471	0	0	0.6	0.71	11.409
KC9	371.008	1670639	372.015	372.015	0.4924	372	C18H16OP4	13	18	16	0	1	4	0	0.056	0.889	0	0	0.6	-1.89	11.8616
KC6	371.069	3765423	372.076	372.076	-0.1316	372	C19H17O6P	12	19	17	0	6	1	0	0.316	0.895	0	0	0.4	-0.53	5.27377
KC20	371.074	1699848	372.081	372.081	0.0432	372	C16H23O4P3	7	16	23	0	4	3	0	0.25	1.438	0	0	0	-1.88	8.30844
KC5	371.087	4130386	372.094	372.094	-0.3066	372	C30H12	25	30	12	0	0	0	0	0	0.4	0	0	0.8	-0.4	7.39151
KC19	371.087	4211132	372.094	372.094	-0.011	372	C30H12	25	30	12	0	0	0	0	0	0.4	0	0	0.8	-0.4	11.9281
KC5	371.097	4548177	372.104	372.104	-0.2211	372	C20H22O3P2	11	20	22	0	3	2	0	0.15	1.1	0	0	0.4	-1.3	8.13916
KC20	371.097	1821715	372.104	372.104	0.1552	372	C20H22O3P2	11	20	22	0	3	2	0	0.15	1.1	0	0	0.4	-1.3	8.90409
KC3	371.099	4396230	372.106	372.106	0.4017	372	C16H20O10	7	16	20	0	10	0	0	0.625	1.25	0	0	-0.5	0	13.9862
KC4	371.112	4296147	372.12	372.12	-0.157	372	C24H22P2	15	24	22	0	0	2	0	0	0.917	0	0	0.6	-1.33	9.96376
KC12	371.112	5777666	372.12	372.12	0.0849	372	C24H22P2	15	24	22	0	0	2	0	0	0.917	0	0	0.6	-1.33	11.551
KC15	371.114	5671684	372.121	372.121	0.1702	372	C20H20O7	11	20	20	0	7	0	0	0.35	1	0	0	0.3	-0.3	19.0856
KC3	371.114	5903554	372.121	372.121	0.4926	372	C20H20O7	11	20	20	0	7	0	0	0.35	1	0	0	0.3	-0.3	18.7816
KC5	371.123	4027982	372.13	372.13	-0.0714	372	C14H32O3P4	1	14	32	0	3	4	0	0.214	2.286	0	0	-0.9	-3.29	7.20825
KC4	371.123	4320724	372.13	372.13	0.1704	372	C14H32O3P4	1	14	32	0	3	4	0	0.214	2.286	0	0	-0.9	-3.29	10.0208
KC17	371.133	4914513	372.141	372.141	-0.3433	372	C21H26O2P2	10	21	26	0	2	2	0	0.095	1.238	0	0	0.4	-1.52	10.9905
KC5	371.133	8083021	372.141	372.141	-0.2627	372	C21H26O2P2	10	21	26	0	2	2	0	0.095	1.238	0	0	0.4	-1.52	14.4649
KC4	371.134	5148116	372.141	372.141	0.0329	372	C21H26O2P2	10	21	26	0	2	2	0	0.095	1.238	0	0	0.4	-1.52	11.9397
KC12	371.134	4614406	372.141	372.141	0.221	372	C21H26O2P2	10	21	26	0	2	2	0	0.095	1.238	0	0	0.4	-1.52	9.22537
KC15	371.135	5892860	372.142	372.142	0.2256	372	C17H24O9	6	17	24	0	9	0	0	0.529	1.412	0	0	-0.4	-0.35	19.8299
KC3	371.135	7423164	372.142	372.142	0.4137	372	C17H24O9	6	17	24	0	9	0	0	0.529	1.412	0	0	-0.4	-0.35	23.6161
KC10	371.135	4651642	372.142	372.142	0.4406	372	C17H24O9	6	17	24	0	9	0	0	0.529	1.412	0	0	-0.4	-0.35	3.38263
KC15	371.15	5966582	372.157	372.157	0.4778	372	C21H24O6	10	21	24	0	6	0	0	0.286	1.143	0	0	0.3	-0.57	20.0779
KC20	371.164	1769008	372.172	372.172	0.1699	372	C19H25N4O2P	10	19	25	4	2	1	0	0.105	1.316	0.2105	0	0.2	-0.74	8.64647
KC17	371.17	4484412	372.177	372.177	-0.17	372	C22H30OP2	9	22	30	0	1	2	0	0.045	1.364	0	0	0.3	-1.73	10.0286
KC5	371.17	6805065	372.177	372.177	-0.1163	372	C22H30OP2	9	22	30	0	1	2	0	0.045	1.364	0	0	0.3	-1.73	12.178
KC4	371.17	5725653	372.177	372.177	0.018	372	C22H30OP2	9	22	30	0	1	2	0	0.045	1.364	0	0	0.3	-1.73	13.2791
KC12	371.17	4067083	372.177	372.177	0.0718	372	C22H30OP2	9	22	30	0	1	2	0	0.045	1.364	0	0	0.3	-1.73	8.13113
KC20	371.17	2789426	372.177	372.177	0.3942	372	C22H30OP2	9	22	30	0	1	2	0	0.045	1.364	0	0	0.3	-1.73	13.634
KC10	371.171	4790898	372.179	372.178	0.2914	372	C18H28O8	5	18	28	0	8	0	0	0.444	1.556	0	0	-0.3	-0.67	3.48389
KC15	371.171	5294830	372.179	372.178	0.3182	372	C18H28O8	5	18	28	0	8	0	0	0.444	1.556	0	0	-0.3	-0.67	17.8175
KC9	371.202	1708575	372.209	372.209	-0.1447	372	C26H28O2	13	26	28	0	2	0	0	0.077	1.077	0	0	0.5	-0.92	12.1309
KC16	371.368	3943377	372.376	372.376	0.4156	372	C27H48	4	27	48	0	0	0	0	0	1.778	0	0	0.1	-1.78	12.5543
KC6	372.08	3814780	373.087	373.087	0.01	373	C14H22N3O3P3	7	14	22	3	3	3	0	0.214	1.571	0.2143	0	-0.4	-1.57	5.3429
KC6	372.108	6157697	373.116	373.116	0.2155	373	C15H27N3P4	6	15	27	3	0	4	0	0	1.8	0.2	0	-0.1	-2.53	8.62434
KC2	372.116	4868594	373.124	373.124	-0.38	373	C15H26N3O2P3	6	15	26	3	2	3	0	0.133	1.733	0.2	0	-0.3	-1.87	13.6492
KC6	372.116	6419843	373.124	373.124	-0.2192	373	C15H26N3O2P3	6	15	26	3	2	3	0	0.133	1.733	0.2	0	-0.3	-1.87	8.9915
KC6	372.189	4875665	373.197	373.197	-0.1147	373	C17H34N3P3	4	17	34	3	0	3	0	0	2	0.1765	0	-0.2	-2.35	6.82875
KC9	372.942	1844170	373.949	373.95	-0.362	374	C23H2O2S2	23	23	2	0	2	0	2	0.087	0.087	0	0.087	1	0.26	13.0936
KC20	373.06	1931111	374.067	374.067	-0.2738	374	C19H22P4	11	19	22	0	0	4	0	0	1.158	0	0	0.5	-2.21	9.43879
KC9	373.113	1751027	374.12	374.12	-0.1666	374	C20H24O3P2	10	20	24	0	3	2	0	0.15	1.2	0	0	0.3	-1.4	12.4323
KC3	373.114	4414119	374.121	374.121	0.2924	374	C16H22O10	6	16	22	0	10	0	0	0.625	1.375	0	0	-0.7	-0.12	14.0431
KC9	373.115	2002932	374.123	374.122	0.3707	374	C27H19P	19	27	19	0	0	1	0	0	0.704	0	0	0.7	-0.89	14.2209
KC2	373.123	3793212	374.131	374.131	-0.0094	374	C27H18O2	19	27	18	0	2	0	0	0.074	0.667	0	0	0.7	-0.52	10.6343
KC19	373.128	4114338	374.135	374.135	-0.2365	374	C24H24P2	14	24	24	0	0	2	0	0	1	0	0	0.5	-1.42	11.6539
KC5	373.128	5563765	374.135	374.135	-0.183	374	C24H24P2	14	24	24	0	0	2	0	0	1	0	0	0.5	-1.42	9.9566
KC20	373.128	2036612	374.135	374.135	-0.0226	374	C24H24P2	14	24	24	0	0	2	0	0	1	0	0	0.5	-1.42	9.95445
KC12	373.128	8022569	374.135	374.135	0.0575	374	C24H24P2	14	24	24	0	0	2	0	0	1	0	0	0.5	-1.42	16.0391
KC4	373.128	5123616	374.135	374.135	0.0843	374	C24H24P2	14	24	24	0	0	2	0	0	1	0	0	0.5	-1.42	11.8829
KC11	373.129	5169541	374.137	374.137	-0.1249	374	C20H22O7	10	20	22	0	7	0	0	0.35	1.1	0	0	0.2	-0.4	23.7175
KC15	373.129	8230898	374.137	374.137	0.3294	374	C20H22O7	10	20	22	0	7	0	0	0.35	1.1	0	0	0.2	-0.4	27.6975
KC3	373.129	7983779	374.137	374.137	0.4631	374	C20H22O7	10	20	22	0	7	0	0	0.35	1.1	0	0	0.2	-0.4	25.3996
KC5	373.149	4310386	374.156	374.156	-0.3149	374	C21H28O2P2	9	21	28	0	2	2	0	0.095	1.333	0	0	0.3	-1.62	7.71363
KC10	373.151	4196550	374.158	374.158	0.2777	374	C17H26O9	5	17	26	0	9	0	0	0.529	1.529	0	0	-0.5	-0.47	3.05169
KC15	373.166	7718884	374.173	374.173	0.288	374	C21H26O6	9	21	26	0	6	0	0	0.286	1.238	0	0	0.2	-0.67	25.9746
KC20	373.238	1732276	374.246	374.246	-0.4897	374	C23H34O4	7	23	34	0	4	0	0	0.174	1.478	0	0	0.2	-1.13	8.46694
KC9	373.239	1884690	374.246	374.246	0.2852	374	C23H34O4	7	23	34	0	4	0	0	0.174	1.478	0	0	0.2	-1.13	13.3813
KC6	374.124	8730353	375.131	375.131	0.1609	375	C15H29N3P4	5	15	29	3	0	4	0	0	1.933	0.2	0	-0.2	-2.67	12.2275
KC2	374.124	4823150	375.131	375.131	0.4008	375	C15H29N3P4	5	15	29	3	0	4	0	0	1.933	0.2	0	-0.2	-2.67	13.5218
KC6	374.132	10262258	375.139	375.139	-0.1649	375	C15H28N3O2P3	5	15	28	3	2	3	0	0.133	1.867	0.2	0	-0.4	-2	14.3731
KC6	374.168	7788280	375.176	375.176	-0.3928	375	C16H32N3OP3	4	16	32	3	1	3	0	0.062	2	0.1875	0	-0.3	-2.25	10.9081
KC2	374.168	4681828	375.176	375.176	-0.3395	375	C16H32N3OP3	4	16	32	3	1	3	0	0.062	2	0.1875	0	-0.3	-2.25	13.1256
KC20	374.902	1658500	375.909	375.909	-0.418	376	C14H3O7P3	15	14	3	0	7	3	0	0.5	0.214	0	0	1.2	-0.29	8.10634
KC12	374.909	15371014	375.916	375.916	-0.4285	376	C18H4O2P4	19	18	4	0	2	4	0	0.111	0.222	0	0	1.1	-1.11	30.7306
KC4	374.909	13545069	375.916	375.916	-0.4018	376	C18H4O2P4	19	18	4	0	2	4	0	0.111	0.222	0	0	1.1	-1.11	31.4142
KC13	374.909	10287273	375.916	375.916	0.1302	376	C18H4O2P4	19	18	4	0	2	4	0	0.111	0.222	0	0	1.1	-1.11	46.2617
KC7	374.91	8112506	375.917	375.917	-0.3441	376	C14H2O9P2	15	14	2	0	9	2	0	0.643	0.143	0	0	1.3	0.43	17.8857
KC10	374.91	18503490	375.917	375.917	0.0284	376	C14H2O9P2	15	14	2	0	9	2	0	0.643	0.143	0	0	1.3	0.43	13.4556
KC15	374.91	6403390	375.917	375.917	0.055	376	C14H2O9P2	15	14	2	0	9	2	0	0.643	0.143	0	0	1.3	0.43	21.5478
KC3	374.91	9965774	375.917	375.917	0.188	376	C14H2O9P2	15	14	2	0	9	2	0	0.643	0.143	0	0	1.3	0.43	31.7051
KC16	374.91	22383288	375.918	375.917	0.4274	376	C14H2O9P2	15	14	2	0	9	2	0	0.643	0.143	0	0	1.3	0.43	71.2605
KC9	374.938	1590703	375.945	375.946	-0.273	376	C15H7O6P3	14	15	7	0	6	3	0	0.4	0.467	0	0	0.8	-0.67	11.294
KC9	374.983	1758138	375.99	375.99	0.0522	376	C16H10O7P2	13	16	10	0	7	2	0	0.438	0.625	0	0	0.6	-0.38	12.4828
KC20	374.996	1688236	376.003	376.003	-0.4455	376	C13H15O7P3	8	13	15	0	7	3	0	0.538	1.154	0	0	-0.7	-1.23	8.25168
KC20	375.03	1849019	376.037	376.037	-0.1517	376	C24H8O5	21	24	8	0	5	0	0	0.208	0.333	0	0	0.8	0.08	9.03755
KC2	375.061	4573080	376.069	376.069	-0.1718	376	C11H22O10P2	2	11	22	0	10	2	0	0.909	2	0	0	10	-1.09	12.8207
KC9	375.072	1635791	376.079	376.079	0.1707	376	C18H16O9	11	18	16	0	9	0	0	0.5	0.889	0	0	0.2	0.11	11.6141
KC9	375.092	1922516	376.099	376.099	-0.4171	376	C19H22O4P2	10	19	22	0	4	2	0	0.211	1.158	0	0	0.3	-1.26	13.6499
KC4	375.097	4304502	376.104	376.104	-0.0315	376	C16H28O2P4	5	16	28	0	2	4	0	0.125	1.75	0	0	-0.1	-2.75	9.98314
KC19	375.107	3880350	376.114	376.115	-0.46	376	C23H22OP2	14	23	22	0	1	2	0	0.043	0.957	0	0	0.6	-1.3	10.9911
KC5	375.107	5674163	376.114	376.115	-0.3537	376	C23H22OP2	14	23	22	0	1	2	0	0.043	0.957	0	0	0.6	-1.3	10.1542
KC20	375.107	2281180	376.115	376.115	-0.008	376	C23H22OP2	14	23	22	0	1	2	0	0.043	0.957	0	0	0.6	-1.3	11.1498
KC12	375.107	6621981	376.115	376.115	0.0185	376	C23H22OP2	14	23	22	0	1	2	0	0.043	0.957	0	0	0.6	-1.3	13.239
KC4	375.107	5934711	376.115	376.115	0.0717	376	C23H22OP2	14	23	22	0	1	2	0	0.043	0.957	0	0	0.6	-1.3	13.764
KC15	375.109	8692977	376.116	376.116	0.3422	376	C19H20O8	10	19	20	0	8	0	0	0.421	1.053	0	0	0.2	-0.21	29.2524
KC3	375.109	9318554	376.116	376.116	0.4485	376	C19H20O8	10	19	20	0	8	0	0	0.421	1.053	0	0	0.2	-0.21	29.6461
KC10	375.109	3927831	376.116	376.116	0.4751	376	C19H20O8	10	19	20	0	8	0	0	0.421	1.053	0	0	0.2	-0.21	2.85628
KC8	375.113	5607985	376.12	376.12	-0.2559	376	C16H26O6P2	5	16	26	0	6	2	0	0.375	1.625	0	0	-0.4	-1.5	7.73582
KC14	375.12	4244899	376.127	376.127	-0.3195	376	C20H27OP3	9	20	27	0	1	3	0	0.05	1.35	0	0	0.3	-2	9.53638
KC10	375.13	4314899	376.137	376.137	0.3173	376	C16H24O10	5	16	24	0	10	0	0	0.625	1.5	0	0	-0.8	-0.25	3.13775
KC19	375.144	6882708	376.151	376.151	-0.3949	376	C24H26P2	13	24	26	0	0	2	0	0	1.083	0	0	0.5	-1.5	19.4954
KC5	375.144	10482864	376.151	376.151	-0.262	376	C24H26P2	13	24	26	0	0	2	0	0	1.083	0	0	0.5	-1.5	18.7595
KC4	375.144	7450232	376.151	376.151	0.0039	376	C24H26P2	13	24	26	0	0	2	0	0	1.083	0	0	0.5	-1.5	17.2788
KC12	375.144	11914017	376.151	376.151	0.0039	376	C24H26P2	13	24	26	0	0	2	0	0	1.083	0	0	0.5	-1.5	23.8191
KC20	375.144	3575532	376.151	376.151	0.2697	376	C24H26P2	13	24	26	0	0	2	0	0	1.083	0	0	0.5	-1.5	17.4763
KC11	375.145	4549806	376.152	376.152	-0.1244	376	C20H24O7	9	20	24	0	7	0	0	0.35	1.2	0	0	0.2	-0.5	20.8742
KC15	375.145	13042915	376.152	376.152	0.3807	376	C20H24O7	9	20	24	0	7	0	0	0.35	1.2	0	0	0.2	-0.5	43.8903
KC10	375.145	5887759	376.152	376.152	0.487	376	C20H24O7	9	20	24	0	7	0	0	0.35	1.2	0	0	0.2	-0.5	4.28152
KC3	375.145	13856913	376.152	376.152	0.487	376	C20H24O7	9	20	24	0	7	0	0	0.35	1.2	0	0	0.2	-0.5	44.0844
KC15	375.181	8987861	376.189	376.189	0.2862	376	C21H28O6	8	21	28	0	6	0	0	0.286	1.333	0	0	0.1	-0.76	30.2448
KC9	375.181	1701866	376.189	376.189	0.4723	376	C21H28O6	8	21	28	0	6	0	0	0.286	1.333	0	0	0.1	-0.76	12.0833
KC3	375.182	7196808	376.189	376.189	0.4989	376	C21H28O6	8	21	28	0	6	0	0	0.286	1.333	0	0	0.1	-0.76	22.8959
KC11	375.218	5155968	376.225	376.225	-0.1803	376	C22H32O5	7	22	32	0	5	0	0	0.227	1.455	0	0	0.1	-1	23.6552
KC20	375.218	2215692	376.225	376.225	-0.1537	376	C22H32O5	7	22	32	0	5	0	0	0.227	1.455	0	0	0.1	-1	10.8298
KC15	375.218	9036999	376.225	376.225	0.3779	376	C22H32O5	7	22	32	0	5	0	0	0.227	1.455	0	0	0.1	-1	30.4101
KC10	375.218	4159231	376.225	376.225	0.4842	376	C22H32O5	7	22	32	0	5	0	0	0.227	1.455	0	0	0.1	-1	3.02455
KC9	375.282	1584130	376.29	376.29	0.0887	376	C24H41OP	5	24	41	0	1	1	0	0.042	1.708	0	0	0.1	-1.83	11.2474
KC20	375.327	2042683	376.334	376.334	-0.2773	376	C25H44O2	4	25	44	0	2	0	0	0.08	1.76	0	0	0.1	-1.6	9.98413
KC6	376.103	8759346	377.111	377.11	0.148	377	C14H27N3OP4	5	14	27	3	1	4	0	0.071	1.929	0.2143	0	-0.5	-2.57	12.2682
KC6	376.14	9177144	377.147	377.147	0.1334	377	C15H31N3P4	4	15	31	3	0	4	0	0	2.067	0.2	0	-0.4	-2.8	12.8533
KC20	376.949	1752565	377.957	377.957	0.4822	378	C18H3O8P	18	18	3	0	8	1	0	0.444	0.167	0	0	1	0.44	8.5661
KC19	377.076	3949481	378.083	378.083	0.1153	378	C15H26O3P4	5	15	26	0	3	4	0	0.2	1.733	0	0	-0.2	-2.67	11.187
KC9	377.084	9921459	378.091	378.091	-0.393	378	C15H25O5P3	5	15	25	0	5	3	0	0.333	1.667	0	0	-0.4	-2	70.4426
KC18	377.084	13212398	378.091	378.091	-0.3401	378	C15H25O5P3	5	15	25	0	5	3	0	0.333	1.667	0	0	-0.4	-2	79.6676
KC17	377.084	23883514	378.091	378.091	-0.0756	378	C15H25O5P3	5	15	25	0	5	3	0	0.333	1.667	0	0	-0.4	-2	53.4114
KC19	377.084	27599782	378.092	378.091	0.0831	378	C15H25O5P3	5	15	25	0	5	3	0	0.333	1.667	0	0	-0.4	-2	78.1767
KC5	377.084	30094346	378.092	378.091	0.1095	378	C15H25O5P3	5	15	25	0	5	3	0	0.333	1.667	0	0	-0.4	-2	53.8552
KC12	377.084	34884592	378.092	378.091	0.4004	378	C15H25O5P3	5	15	25	0	5	3	0	0.333	1.667	0	0	-0.4	-2	69.7431
KC4	377.084	36990684	378.092	378.091	0.4269	378	C15H25O5P3	5	15	25	0	5	3	0	0.333	1.667	0	0	-0.4	-2	85.79
KC11	377.086	13936597	378.093	378.093	0.3521	378	C11H23O12P	1	11	23	0	12	1	0	1.091	2.091	0	0	6	-0.36	63.9401
KC7	377.086	18258354	378.093	378.093	0.4843	378	C11H23O12P	1	11	23	0	12	1	0	1.091	2.091	0	0	6	-0.36	40.2543
KC5	377.086	5944329	378.094	378.094	-0.3639	378	C22H20O2P2	14	22	20	0	2	2	0	0.091	0.909	0	0	0.6	-1.18	10.6376
KC9	377.086	1605044	378.094	378.094	-0.2581	378	C22H20O2P2	14	22	20	0	2	2	0	0.091	0.909	0	0	0.6	-1.18	11.3958
KC12	377.087	4402162	378.094	378.094	0.0857	378	C22H20O2P2	14	22	20	0	2	2	0	0.091	0.909	0	0	0.6	-1.18	8.80104
KC15	377.088	4243964	378.095	378.095	0.1696	378	C18H18O9	10	18	18	0	9	0	0	0.5	1	0	0	0.1	0	14.2812
KC3	377.088	6581925	378.095	378.095	0.3812	378	C18H18O9	10	18	18	0	9	0	0	0.5	1	0	0	0.1	0	20.9397
KC20	377.097	1866292	378.105	378.104	0.2942	378	C29H14O	23	29	14	0	1	0	0	0.034	0.483	0	0	0.8	-0.41	9.12197
KC5	377.112	3888135	378.12	378.12	0.0214	378	C16H30O2P4	4	16	30	0	2	4	0	0.125	1.875	0	0	-0.2	-2.88	6.95799
KC20	377.122	1664575	378.129	378.129	-0.1385	378	C12H27O11P	0	12	27	0	11	1	0	0.917	2.25	0	0	-999	-0.83	8.13603
KC19	377.123	6988701	378.13	378.13	-0.4578	378	C23H24OP2	13	23	24	0	1	2	0	0.043	1.043	0	0	0.5	-1.39	19.7956
KC5	377.123	13349894	378.13	378.13	-0.2991	378	C23H24OP2	13	23	24	0	1	2	0	0.043	1.043	0	0	0.5	-1.39	23.8902
KC17	377.123	5627617	378.13	378.13	-0.2991	378	C23H24OP2	13	23	24	0	1	2	0	0.043	1.043	0	0	0.5	-1.39	12.5852
KC12	377.123	10537974	378.13	378.13	-0.114	378	C23H24OP2	13	23	24	0	1	2	0	0.043	1.043	0	0	0.5	-1.39	21.0681
KC4	377.123	7294684	378.13	378.13	-0.0611	378	C23H24OP2	13	23	24	0	1	2	0	0.043	1.043	0	0	0.5	-1.39	16.9181
KC9	377.123	2341821	378.13	378.13	0.2298	378	C23H24OP2	13	23	24	0	1	2	0	0.043	1.043	0	0	0.5	-1.39	16.627
KC13	377.123	6493118	378.13	378.13	0.4943	378	C23H24OP2	13	23	24	0	1	2	0	0.043	1.043	0	0	0.5	-1.39	29.1995
KC11	377.124	5638076	378.131	378.131	-0.1358	378	C19H22O8	9	19	22	0	8	0	0	0.421	1.158	0	0	0.1	-0.32	25.8671
KC15	377.124	14336494	378.132	378.131	0.3931	378	C19H22O8	9	19	22	0	8	0	0	0.421	1.158	0	0	0.1	-0.32	48.2433
KC5	377.136	4371461	378.143	378.143	0.2373	378	C20H29OP3	8	20	29	0	1	3	0	0.05	1.45	0	0	0.2	-2.1	7.82292
KC2	377.155	4736380	378.162	378.162	0.149	378	C27H22O2	17	27	22	0	2	0	0	0.074	0.815	0	0	0.6	-0.67	13.2785
KC14	377.157	3972440	378.164	378.164	0.1068	378	C17H33O3P3	3	17	33	0	3	3	0	0.176	1.941	0	0	-0.3	-2.47	8.92428
KC17	377.159	9731785	378.166	378.167	-0.4458	378	C24H28P2	12	24	28	0	0	2	0	0	1.167	0	0	0.5	-1.58	21.7635
KC19	377.159	7562132	378.166	378.167	-0.4458	378	C24H28P2	12	24	28	0	0	2	0	0	1.167	0	0	0.5	-1.58	21.4198
KC5	377.159	19428356	378.167	378.167	-0.2872	378	C24H28P2	12	24	28	0	0	2	0	0	1.167	0	0	0.5	-1.58	34.7679
KC12	377.159	14044154	378.167	378.167	-0.0756	378	C24H28P2	12	24	28	0	0	2	0	0	1.167	0	0	0.5	-1.58	28.0778
KC4	377.159	12160734	378.167	378.167	-0.0492	378	C24H28P2	12	24	28	0	0	2	0	0	1.167	0	0	0.5	-1.58	28.2036
KC11	377.16	5883812	378.168	378.168	-0.2562	378	C20H26O7	8	20	26	0	7	0	0	0.35	1.3	0	0	0.1	-0.6	26.9945
KC15	377.161	16613856	378.168	378.168	0.352	378	C20H26O7	8	20	26	0	7	0	0	0.35	1.3	0	0	0.1	-0.6	55.9067
KC10	377.161	8885588	378.168	378.168	0.4578	378	C20H26O7	8	20	26	0	7	0	0	0.35	1.3	0	0	0.1	-0.6	6.46151
KC20	377.173	1698389	378.181	378.181	-0.1429	378	C17H31O7P	3	17	31	0	7	1	0	0.412	1.824	0	0	-0.6	-1.29	8.3013
KC11	377.197	4147084	378.204	378.204	-0.2707	378	C21H30O6	7	21	30	0	6	0	0	0.286	1.429	0	0	0.1	-0.86	19.0265
KC10	377.197	4560204	378.204	378.204	0.4167	378	C21H30O6	7	21	30	0	6	0	0	0.286	1.429	0	0	0.1	-0.86	3.31614
KC15	377.197	7795154	378.204	378.204	0.4696	378	C21H30O6	7	21	30	0	6	0	0	0.286	1.429	0	0	0.1	-0.86	26.2312
KC9	377.298	1821671	378.305	378.305	0.1673	378	C24H43OP	4	24	43	0	1	1	0	0.042	1.792	0	0	0.1	-1.92	12.9339
KC13	378.904	3882892	379.911	379.911	-0.1729	380	C17H4O3P4	18	17	4	0	3	4	0	0.176	0.235	0	0	1.1	-1.06	17.4613
KC15	378.905	4982612	379.912	379.912	0.0686	380	C13H2O10P2	14	13	2	0	10	2	0	0.769	0.154	0	0	2	0.62	16.7668
KC3	378.905	8473840	379.912	379.912	0.1212	380	C13H2O10P2	14	13	2	0	10	2	0	0.769	0.154	0	0	2	0.62	26.9587
KC10	378.905	5944282	379.912	379.912	0.1475	380	C13H2O10P2	14	13	2	0	10	2	0	0.769	0.154	0	0	2	0.62	4.32262
KC16	378.905	31410504	379.912	379.912	0.4107	380	C13H2O10P2	14	13	2	0	10	2	0	0.769	0.154	0	0	2	0.62	100
KC17	378.92	4168248	379.928	379.928	-0.1319	380	C17H2O7P2	18	17	2	0	7	2	0	0.412	0.118	0	0	1.1	0.12	9.32157
KC3	378.944	3943655	379.951	379.951	0.2673	380	C21HO6P	22	21	1	0	6	1	0	0.286	0.048	0	0	1.1	0.29	12.5463
KC9	378.97	1972597	379.977	379.977	0.0454	380	C15H11O6P3	12	15	11	0	6	3	0	0.4	0.733	0	0	0.5	-0.93	14.0055
KC9	378.985	1581433	379.992	379.992	0.0555	380	C19H11O3P3	16	19	11	0	3	3	0	0.158	0.579	0	0	0.8	-1.05	11.2282
KC9	379	1568125	380.007	380.007	0.1854	380	C21H4N2O6	21	21	4	2	6	0	0	0.286	0.19	0.0952	0	1	0.67	11.1337
KC8	379.013	4343917	380.02	380.02	-0.4268	380	C20H16P4	15	20	16	0	0	4	0	0	0.8	0	0	0.7	-1.8	5.99213
KC8	379.056	5335121	380.064	380.064	-0.2611	380	C10H22O11P2	1	10	22	0	11	2	0	1.1	2.2	0	0	4	-1	7.35942
KC14	379.058	7093527	380.065	380.065	-0.0524	380	C21H19OP3	14	21	19	0	1	3	0	0.048	0.905	0	0	0.6	-1.52	15.936
KC20	379.061	1649018	380.069	380.068	0.2968	380	C24H12O5	19	24	12	0	5	0	0	0.208	0.5	0	0	0.7	-0.08	8.05999
KC20	379.063	1665403	380.071	380.071	-0.0872	380	C14H23O6P3	5	14	23	0	6	3	0	0.429	1.643	0	0	-0.8	-1.86	8.14008
KC3	379.067	4201674	380.074	380.074	0.3936	380	C17H16O10	10	17	16	0	10	0	0	0.588	0.941	0	0	0	0.24	13.3672
KC22	379.081	5083919	380.088	380.088	-0.2586	380	C25H18P2	18	25	18	0	0	2	0	0	0.72	0	0	0.7	-1.12	29.007
KC1	379.081	4988307	380.088	380.088	-0.1533	380	C25H18P2	18	25	18	0	0	2	0	0	0.72	0	0	0.7	-1.12	22.9427
KC18	379.081	5495678	380.088	380.088	-0.0744	380	C25H18P2	18	25	18	0	0	2	0	0	0.72	0	0	0.7	-1.12	33.1376
KC9	379.081	2981264	380.088	380.088	-0.0744	380	C25H18P2	18	25	18	0	0	2	0	0	0.72	0	0	0.7	-1.12	21.167
KC17	379.081	8088012	380.088	380.088	0.3202	380	C25H18P2	18	25	18	0	0	2	0	0	0.72	0	0	0.7	-1.12	18.0874
KC9	379.085	1720209	380.092	380.092	0.0197	380	C11H27O8P3	0	11	27	0	8	3	0	0.727	2.455	0	0	-999	-2.36	12.2135
KC5	379.092	4383608	380.099	380.099	0.0619	380	C15H28O3P4	4	15	28	0	3	4	0	0.2	1.867	0	0	-0.4	-2.8	7.84466
KC15	379.093	3981070	380.1	380.1	0.4874	380	C11H26O10P2	0	11	26	0	10	2	0	0.909	2.364	0	0	12	-1.45	13.3966
KC19	379.102	4497850	380.109	380.11	-0.2832	380	C22H22O2P2	13	22	22	0	2	2	0	0.091	1	0	0	0.5	-1.27	12.7402
KC5	379.102	7385975	380.109	380.11	-0.2569	380	C22H22O2P2	13	22	22	0	2	2	0	0.091	1	0	0	0.5	-1.27	13.2175
KC4	379.102	4661072	380.109	380.11	-0.1253	380	C22H22O2P2	13	22	22	0	2	2	0	0.091	1	0	0	0.5	-1.27	10.8101
KC12	379.102	5258427	380.109	380.11	-0.0464	380	C22H22O2P2	13	22	22	0	2	2	0	0.091	1	0	0	0.5	-1.27	10.5129
KC15	379.104	8601354	380.111	380.111	0.379	380	C18H20O9	9	18	20	0	9	0	0	0.5	1.111	0	0	0	-0.11	28.9441
KC3	379.104	8998082	380.111	380.111	0.458	380	C18H20O9	9	18	20	0	9	0	0	0.5	1.111	0	0	0	-0.11	28.6265
KC10	379.107	4727727	380.114	380.114	0.4404	380	C19H28P4	8	19	28	0	0	4	0	0	1.474	0	0	0.3	-2.53	3.43796
KC5	379.128	3994486	380.135	380.135	-0.1104	380	C16H32O2P4	3	16	32	0	2	4	0	0.125	2	0	0	-0.3	-3	7.14831
KC19	379.139	8733105	380.146	380.146	-0.2977	380	C23H26OP2	12	23	26	0	1	2	0	0.043	1.13	0	0	0.4	-1.48	24.7366
KC5	379.139	22721396	380.146	380.146	-0.2714	380	C23H26OP2	12	23	26	0	1	2	0	0.043	1.13	0	0	0.4	-1.48	40.6609
KC4	379.139	12431186	380.146	380.146	-0.0609	380	C23H26OP2	12	23	26	0	1	2	0	0.043	1.13	0	0	0.4	-1.48	28.8308
KC12	379.139	14814398	380.146	380.146	-0.0346	380	C23H26OP2	12	23	26	0	1	2	0	0.043	1.13	0	0	0.4	-1.48	29.6177
KC20	379.139	5856667	380.146	380.146	0.2548	380	C23H26OP2	12	23	26	0	1	2	0	0.043	1.13	0	0	0.4	-1.48	28.6259
KC13	379.139	9146106	380.146	380.146	0.4389	380	C23H26OP2	12	23	26	0	1	2	0	0.043	1.13	0	0	0.4	-1.48	41.1299
KC11	379.14	8872590	380.147	380.147	-0.2142	380	C19H24O8	8	19	24	0	8	0	0	0.421	1.263	0	0	0	-0.42	40.7068
KC7	379.14	7215574	380.147	380.147	0.0488	380	C19H24O8	8	19	24	0	8	0	0	0.421	1.263	0	0	0	-0.42	15.9082
KC15	379.14	18104062	380.147	380.147	0.3645	380	C19H24O8	8	19	24	0	8	0	0	0.421	1.263	0	0	0	-0.42	60.9214
KC17	379.175	12405133	380.182	380.182	-0.4699	380	C24H30P2	11	24	30	0	0	2	0	0	1.25	0	0	0.4	-1.67	27.7419
KC5	379.175	23376754	380.182	380.182	-0.3121	380	C24H30P2	11	24	30	0	0	2	0	0	1.25	0	0	0.4	-1.67	41.8337
KC19	379.175	6693288	380.182	380.182	-0.2595	380	C24H30P2	11	24	30	0	0	2	0	0	1.25	0	0	0.4	-1.67	18.9588
KC4	379.175	9813845	380.182	380.182	-0.0754	380	C24H30P2	11	24	30	0	0	2	0	0	1.25	0	0	0.4	-1.67	22.7606
KC12	379.175	14765250	380.182	380.182	-0.0491	380	C24H30P2	11	24	30	0	0	2	0	0	1.25	0	0	0.4	-1.67	29.5195
KC20	379.175	6712746	380.182	380.182	0.2139	380	C24H30P2	11	24	30	0	0	2	0	0	1.25	0	0	0.4	-1.67	32.8102
KC13	379.175	4943588	380.182	380.182	0.4244	380	C24H30P2	11	24	30	0	0	2	0	0	1.25	0	0	0.4	-1.67	22.2312
KC11	379.176	6974070	380.184	380.184	0.2185	380	C20H28O7	7	20	28	0	7	0	0	0.35	1.4	0	0	0	-0.7	31.9965
KC10	379.176	10515360	380.184	380.184	0.3763	380	C20H28O7	7	20	28	0	7	0	0	0.35	1.4	0	0	0	-0.7	7.64667
KC15	379.176	16187120	380.184	380.184	0.4289	380	C20H28O7	7	20	28	0	7	0	0	0.35	1.4	0	0	0	-0.7	54.4707
KC3	379.176	20901040	380.184	380.184	0.4815	380	C20H28O7	7	20	28	0	7	0	0	0.35	1.4	0	0	0	-0.7	66.4946
KC9	379.195	1604011	380.202	380.202	-0.3798	380	C21H32O4S	6	21	32	0	4	0	1	0.19	1.524	0	0.0476	0.1	-1.05	11.3885
KC15	379.213	5246691	380.22	380.22	0.4144	380	C21H32O6	6	21	32	0	6	0	0	0.286	1.524	0	0	0	-0.95	17.6555
KC20	379.256	1645516	380.263	380.263	-0.0313	380	C26H37P	9	26	37	0	0	1	0	0	1.423	0	0	0.3	-1.62	8.04287
KC7	380.823	45357548	381.83	381.83	-0.2936	382	C12HO3P3S3	14	12	1	0	3	3	3	0.25	0.083	0	0.25	1.7	-0.33	100
KC10	380.823	137515584	381.83	381.83	0.073	382	C12HO3P3S3	14	12	1	0	3	3	3	0.25	0.083	0	0.25	1.7	-0.33	100
KC20	380.923	1637004	381.93	381.93	0.2051	382	C10H6O12S2	8	10	6	0	12	0	2	1.2	0.6	0	0.2	1.5	2.2	8.00127
KC20	380.923	1637004	381.93	381.93	0.0863	382	C14H10O3P4S	12	14	10	0	3	4	1	0.214	0.714	0	0.0714	0.7	-1.57	8.00127
KC20	380.928	1769614	381.935	381.935	-0.047	382	C17H5O5P3	17	17	5	0	5	3	0	0.294	0.294	0	0	1	-0.59	8.64943
KC20	380.988	1696935	381.995	381.995	-0.1618	382	C22H8O3P2	20	22	8	0	3	2	0	0.136	0.364	0	0	0.9	-0.55	8.2942
KC5	381.071	4223750	382.078	382.078	0.0759	382	C14H26O4P4	4	14	26	0	4	4	0	0.286	1.857	0	0	-0.7	-2.71	7.55859
KC5	381.071	4223750	382.078	382.078	-0.1676	382	C31H10	27	31	10	0	0	0	0	0	0.323	0	0	0.9	-0.32	7.55859
KC9	381.081	1961834	382.089	382.089	-0.2151	382	C21H20O3P2	13	21	20	0	3	2	0	0.143	0.952	0	0	0.5	-1.14	13.9291
KC15	381.083	4222018	382.09	382.09	0.3128	382	C17H18O10	9	17	18	0	10	0	0	0.588	1.059	0	0	-0.1	0.12	14.2074
KC8	381.116	4043609	382.124	382.124	0.1553	382	C14H18N6O7	9	14	18	6	7	0	0	0.5	1.286	0.4286	0	-4	1	5.57787
KC5	381.118	13677316	382.125	382.125	-0.4127	382	C22H24O2P2	12	22	24	0	2	2	0	0.091	1.091	0	0	0.4	-1.36	24.4762
KC19	381.118	7036904	382.125	382.125	-0.308	382	C22H24O2P2	12	22	24	0	2	2	0	0.091	1.091	0	0	0.4	-1.36	19.9321
KC12	381.118	7712129	382.125	382.125	-0.0987	382	C22H24O2P2	12	22	24	0	2	2	0	0.091	1.091	0	0	0.4	-1.36	15.4185
KC4	381.118	7081945	382.125	382.125	-0.0463	382	C22H24O2P2	12	22	24	0	2	2	0	0.091	1.091	0	0	0.4	-1.36	16.4247
KC13	381.118	6720025	382.125	382.125	0.3985	382	C22H24O2P2	12	22	24	0	2	2	0	0.091	1.091	0	0	0.4	-1.36	30.2199
KC11	381.119	6937954	382.126	382.126	-0.225	382	C18H22O9	8	18	22	0	9	0	0	0.5	1.222	0	0	-0.1	-0.22	31.8308
KC15	381.119	11263029	382.127	382.126	0.3769	382	C18H22O9	8	18	22	0	9	0	0	0.5	1.222	0	0	-0.1	-0.22	37.9008
KC10	381.119	9302536	382.127	382.126	0.4292	382	C18H22O9	8	18	22	0	9	0	0	0.5	1.222	0	0	-0.1	-0.22	6.76471
KC2	381.141	3850439	382.149	382.149	0.2458	382	C26H23OP	16	26	23	0	1	1	0	0.038	0.885	0	0	0.6	-1	10.7948
KC19	381.154	7569376	382.161	382.162	-0.4271	382	C23H28OP2	11	23	28	0	1	2	0	0.043	1.217	0	0	0.4	-1.57	21.4404
KC5	381.154	26325762	382.161	382.162	-0.3748	382	C23H28OP2	11	23	28	0	1	2	0	0.043	1.217	0	0	0.4	-1.57	47.1111
KC4	381.154	15110108	382.161	382.162	-0.1654	382	C23H28OP2	11	23	28	0	1	2	0	0.043	1.217	0	0	0.4	-1.57	35.0438
KC12	381.154	14028165	382.161	382.162	-0.1131	382	C23H28OP2	11	23	28	0	1	2	0	0.043	1.217	0	0	0.4	-1.57	28.0459
KC11	381.155	7232842	382.163	382.163	-0.1086	382	C19H26O8	7	19	26	0	8	0	0	0.421	1.368	0	0	-0.1	-0.53	33.1837
KC15	381.156	19217448	382.163	382.163	0.3886	382	C19H26O8	7	19	26	0	8	0	0	0.421	1.368	0	0	-0.1	-0.53	64.668
KC10	381.156	13251073	382.163	382.163	0.4409	382	C19H26O8	7	19	26	0	8	0	0	0.421	1.368	0	0	-0.1	-0.53	9.63605
KC17	381.188	3937340	382.195	382.196	-0.4441	382	C17H37O3P3	1	17	37	0	3	3	0	0.176	2.176	0	0	-0.5	-2.71	8.80518
KC17	381.19	11134010	382.198	382.198	-0.4938	382	C24H32P2	10	24	32	0	0	2	0	0	1.333	0	0	0.4	-1.75	24.8993
KC19	381.19	4939736	382.198	382.198	-0.4938	382	C24H32P2	10	24	32	0	0	2	0	0	1.333	0	0	0.4	-1.75	13.9919
KC5	381.191	17888000	382.198	382.198	-0.363	382	C24H32P2	10	24	32	0	0	2	0	0	1.333	0	0	0.4	-1.75	32.0114
KC9	381.191	2866052	382.198	382.198	-0.2583	382	C24H32P2	10	24	32	0	0	2	0	0	1.333	0	0	0.4	-1.75	20.349
KC12	381.191	9923976	382.198	382.198	-0.1537	382	C24H32P2	10	24	32	0	0	2	0	0	1.333	0	0	0.4	-1.75	19.8405
KC4	381.191	9572319	382.198	382.198	-0.1275	382	C24H32P2	10	24	32	0	0	2	0	0	1.333	0	0	0.4	-1.75	22.2004
KC20	381.191	5783804	382.198	382.198	0.1865	382	C24H32P2	10	24	32	0	0	2	0	0	1.333	0	0	0.4	-1.75	28.2698
KC13	381.191	4033003	382.198	382.198	0.2911	382	C24H32P2	10	24	32	0	0	2	0	0	1.333	0	0	0.4	-1.75	18.1364
KC11	381.192	5938481	382.199	382.199	-0.1491	382	C20H30O7	6	20	30	0	7	0	0	0.35	1.5	0	0	-0.1	-0.8	27.2453
KC15	381.192	11852828	382.199	382.199	-0.4784	382	C15H27N8O2P	7	15	27	8	2	1	0	0.133	1.8	0.5333	0	-1	-0.27	39.8856
KC15	381.192	11852828	382.199	382.199	0.3218	382	C20H30O7	6	20	30	0	7	0	0	0.35	1.5	0	0	-0.1	-0.8	39.8856
KC20	381.22	1912072	382.227	382.227	0.3655	382	C21H35O4P	5	21	35	0	4	1	0	0.19	1.667	0	0	0	-1.52	9.34573
KC14	381.889	5078214	382.897	382.897	-0.3202	383	C14HN3O3P4	18	14	1	3	3	4	0	0.214	0.071	0.2143	0	2	-0.43	11.4085
KC8	382.113	6283525	383.121	383.121	0.3566	383	C11H22N5O8P	4	11	22	5	8	1	0	0.727	2	0.4545	0	3.3	0.36	8.66768
KC20	382.142	2070666	383.149	383.149	0.3814	383	C21H25N3S2	11	21	25	3	0	0	2	0	1.19	0.1429	0.0952	0.4	-0.57	10.1209
KC2	382.15	5103488	383.157	383.157	0.0146	383	C14H33N3OP4	2	14	33	3	1	4	0	0.071	2.357	0.2143	0	-1	-3	14.3077
KC6	382.15	9022369	383.157	383.157	0.0668	383	C14H33N3OP4	2	14	33	3	1	4	0	0.071	2.357	0.2143	0	-1	-3	12.6365
KC9	382.975	1766696	383.983	383.982	0.3423	384	C21H5O6P	20	21	5	0	6	1	0	0.286	0.238	0	0	0.9	0.1	12.5436
KC5	383.061	4092595	384.068	384.068	-0.2259	384	C20H18O4P2	13	20	18	0	4	2	0	0.2	0.9	0	0	0.5	-1	7.32388
KC8	383.061	4513499	384.068	384.068	0.2688	384	C20H18O4P2	13	20	18	0	4	2	0	0.2	0.9	0	0	0.5	-1	6.22605
KC9	383.076	1743168	384.083	384.083	-0.4241	384	C24H18OP2	17	24	18	0	1	2	0	0.042	0.75	0	0	0.7	-1.08	12.3765
KC18	383.076	4146328	384.083	384.083	-0.346	384	C24H18OP2	17	24	18	0	1	2	0	0.042	0.75	0	0	0.7	-1.08	25.0014
KC5	383.087	5169843	384.094	384.094	0.0232	384	C14H28O4P4	3	14	28	0	4	4	0	0.286	2	0	0	-0.8	-2.86	9.25166
KC5	383.087	5169843	384.094	384.094	-0.2189	384	C31H12	26	31	12	0	0	0	0	0	0.387	0	0	0.8	-0.39	9.25166
KC5	383.097	5706418	384.104	384.104	-0.3443	384	C21H22O3P2	12	21	22	0	3	2	0	0.143	1.048	0	0	0.4	-1.24	10.2119
KC13	383.097	5092630	384.105	384.104	0.3586	384	C21H22O3P2	12	21	22	0	3	2	0	0.143	1.048	0	0	0.4	-1.24	22.9015
KC10	383.099	4841597	384.106	384.106	0.4672	384	C17H20O10	8	17	20	0	10	0	0	0.588	1.176	0	0	-0.3	0	3.52076
KC5	383.112	5518002	384.12	384.12	-0.3603	384	C25H22P2	16	25	22	0	0	2	0	0	0.88	0	0	0.6	-1.28	9.87471
KC15	383.114	3897739	384.121	384.121	0.4512	384	C21H20O7	12	21	20	0	7	0	0	0.333	0.952	0	0	0.4	-0.29	13.1162
KC20	383.118	1640479	384.125	384.126	-0.1865	384	C18H26O5P2	7	18	26	0	5	2	0	0.278	1.444	0	0	0	-1.44	8.01825
KC5	383.123	4203185	384.13	384.13	0.087	384	C15H32O3P4	2	15	32	0	3	4	0	0.2	2.133	0	0	-0.6	-3.07	7.52179
KC5	383.133	15938225	384.141	384.141	-0.3847	384	C22H26O2P2	11	22	26	0	2	2	0	0.091	1.182	0	0	0.4	-1.45	28.5222
KC12	383.133	8400467	384.141	384.141	-0.2025	384	C22H26O2P2	11	22	26	0	2	2	0	0.091	1.182	0	0	0.4	-1.45	16.7947
KC4	383.133	8212600	384.141	384.141	-0.1764	384	C22H26O2P2	11	22	26	0	2	2	0	0.091	1.182	0	0	0.4	-1.45	19.0469
KC9	383.134	2482509	384.141	384.141	0.1099	384	C22H26O2P2	11	22	26	0	2	2	0	0.091	1.182	0	0	0.4	-1.45	17.6259
KC9	383.135	2085197	384.142	384.142	-0.1199	384	C18H24O9	7	18	24	0	9	0	0	0.5	1.333	0	0	-0.2	-0.33	14.8049
KC11	383.135	6002711	384.142	384.142	-0.0678	384	C18H24O9	7	18	24	0	9	0	0	0.5	1.333	0	0	-0.2	-0.33	27.54
KC15	383.135	11999620	384.142	384.142	0.3487	384	C18H24O9	7	18	24	0	9	0	0	0.5	1.333	0	0	-0.2	-0.33	40.3795
KC10	383.135	12324982	384.142	384.142	0.4528	384	C18H24O9	7	18	24	0	9	0	0	0.5	1.333	0	0	-0.2	-0.33	8.96261
KC5	383.142	4027057	384.149	384.149	-0.4685	384	C22H25O4P	11	22	25	0	4	1	0	0.182	1.136	0	0	0.4	-1	7.2066
KC4	383.142	6418553	384.149	384.149	-0.3384	384	C22H25O4P	11	22	25	0	4	1	0	0.182	1.136	0	0	0.4	-1	14.8861
KC5	383.17	20492976	384.177	384.177	-0.425	384	C23H30OP2	10	23	30	0	1	2	0	0.043	1.304	0	0	0.4	-1.65	36.6731
KC9	383.17	2072918	384.177	384.177	-0.2428	384	C23H30OP2	10	23	30	0	1	2	0	0.043	1.304	0	0	0.4	-1.65	14.7178
KC19	383.17	4615729	384.177	384.177	-0.2168	384	C23H30OP2	10	23	30	0	1	2	0	0.043	1.304	0	0	0.4	-1.65	13.0741
KC4	383.17	11874427	384.177	384.177	-0.1908	384	C23H30OP2	10	23	30	0	1	2	0	0.043	1.304	0	0	0.4	-1.65	27.5396
KC12	383.17	9440855	384.177	384.177	-0.0866	384	C23H30OP2	10	23	30	0	1	2	0	0.043	1.304	0	0	0.4	-1.65	18.8747
KC11	383.171	4315134	384.178	384.178	-0.0301	384	C19H28O8	6	19	28	0	8	0	0	0.421	1.474	0	0	-0.2	-0.63	19.7975
KC15	383.171	11827576	384.179	384.178	0.3343	384	C19H28O8	6	19	28	0	8	0	0	0.421	1.474	0	0	-0.2	-0.63	39.8006
KC10	383.171	9433199	384.179	384.178	0.3604	384	C19H28O8	6	19	28	0	8	0	0	0.421	1.474	0	0	-0.2	-0.63	6.85973
KC3	383.171	14739810	384.179	384.178	0.4905	384	C19H28O8	6	19	28	0	8	0	0	0.421	1.474	0	0	-0.2	-0.63	46.8932
KC14	383.191	4218025	384.198	384.198	-0.2412	384	C20H34O3P2	5	20	34	0	3	2	0	0.15	1.7	0	0	0	-1.9	9.476
KC17	383.206	5328607	384.213	384.214	-0.3352	384	C24H34P2	9	24	34	0	0	2	0	0	1.417	0	0	0.3	-1.83	11.9165
KC5	383.206	9163438	384.213	384.214	-0.3092	384	C24H34P2	9	24	34	0	0	2	0	0	1.417	0	0	0.3	-1.83	16.3984
KC12	383.206	5033563	384.213	384.214	-0.2832	384	C24H34P2	9	24	34	0	0	2	0	0	1.417	0	0	0.3	-1.83	10.0634
KC4	383.206	6742142	384.214	384.214	-0.0749	384	C24H34P2	9	24	34	0	0	2	0	0	1.417	0	0	0.3	-1.83	15.6366
KC15	383.208	6166892	384.215	384.215	0.4241	384	C20H32O7	5	20	32	0	7	0	0	0.35	1.6	0	0	-0.2	-0.9	20.752
KC6	384.08	3988677	385.087	385.087	-0.25	385	C15H22N3O3P3	8	15	22	3	3	3	0	0.2	1.467	0.2	0	-0.2	-1.47	5.58646
KC6	384.108	7011529	385.115	385.116	-0.1287	385	C16H27N3P4	7	16	27	3	0	4	0	0	1.688	0.1875	0	0	-2.38	9.8202
KC2	384.116	4046070	385.124	385.124	-0.2383	385	C16H26N3O2P3	7	16	26	3	2	3	0	0.125	1.625	0.1875	0	-0.1	-1.75	11.3432
KC6	384.153	4751568	385.16	385.16	-0.3305	385	C17H30N3OP3	6	17	30	3	1	3	0	0.059	1.765	0.1765	0	-0.1	-2	6.65495
KC14	384.871	5504143	385.878	385.878	0.3604	386	C11HO10P3	13	11	1	0	10	3	0	0.909	0.091	0	0	0	0.36	12.3653
KC9	385.018	1595654	386.025	386.025	0.2558	386	C11H15O13P	5	11	15	0	13	1	0	1.182	1.364	0	0	3	0.55	11.3292
KC15	385.093	4142864	386.1	386.1	0.1781	386	C20H18O8	12	20	18	0	8	0	0	0.4	0.9	0	0	0.3	-0.1	13.941
KC3	385.093	4532235	386.1	386.1	0.4112	386	C20H18O8	12	20	18	0	8	0	0	0.4	0.9	0	0	0.3	-0.1	14.4189
KC5	385.113	7066243	386.12	386.12	-0.3945	386	C21H24O3P2	11	21	24	0	3	2	0	0.143	1.143	0	0	0.4	-1.33	12.6454
KC4	385.113	4018476	386.12	386.12	-0.1096	386	C21H24O3P2	11	21	24	0	3	2	0	0.143	1.143	0	0	0.4	-1.33	9.31978
KC15	385.114	4003594	386.121	386.121	0.4387	386	C17H22O10	7	17	22	0	10	0	0	0.588	1.294	0	0	-0.4	-0.12	13.4724
KC9	385.115	1615645	386.122	386.122	0.152	386	C28H19P	20	28	19	0	0	1	0	0	0.679	0	0	0.7	-0.86	11.4711
KC12	385.128	4097853	386.135	386.135	-0.4363	386	C25H24P2	15	25	24	0	0	2	0	0	0.96	0	0	0.6	-1.36	8.19265
KC5	385.128	4903554	386.135	386.135	-0.3845	386	C25H24P2	15	25	24	0	0	2	0	0	0.96	0	0	0.6	-1.36	8.77513
KC15	385.129	6665989	386.137	386.137	0.371	386	C21H22O7	11	21	22	0	7	0	0	0.333	1.048	0	0	0.3	-0.38	22.4315
KC5	385.149	12071554	386.156	386.156	-0.3828	386	C22H28O2P2	10	22	28	0	2	2	0	0.091	1.273	0	0	0.3	-1.55	21.6026
KC4	385.149	6205744	386.156	386.156	-0.2534	386	C22H28O2P2	10	22	28	0	2	2	0	0.091	1.273	0	0	0.3	-1.55	14.3926
KC12	385.149	4996928	386.156	386.156	-0.1757	386	C22H28O2P2	10	22	28	0	2	2	0	0.091	1.273	0	0	0.3	-1.55	9.99013
KC10	385.151	7237376	386.158	386.158	0.3985	386	C18H26O9	6	18	26	0	9	0	0	0.5	1.444	0	0	-0.3	-0.44	5.26295
KC15	385.151	8410878	386.158	386.158	0.4503	386	C18H26O9	6	18	26	0	9	0	0	0.5	1.444	0	0	-0.3	-0.44	28.3032
[truncated: 6,130 more rows]
